# Supplementary material for: Synthesis of polysubstituted oxazolidinones via regioselective addition of azonaphthalenes
Source: Royal Society of Chemistry journal article supplement (doi:10.1039/d3qo00820g), 2023-01-01

## Supporting Information

For

### Synthesis of Poly-substituted Oxazolidinones via Regioselective Addition of Azonaphthalenes

Fuyu Li<sup>a,b,c</sup>, Bei Wang<sup>a,b,c</sup>, Hong Xu<sup>a,b,c</sup>, Yao Xiao<sup>c</sup>, Dongwei Huang<sup>c</sup>, Jiyu Wang<sup>\*,a,b,c</sup>

<sup>a</sup> Chengdu Institute of Organic Chemistry, Chinese Academy of Sciences, Chengdu 610041, P. R. China.

\* E-mail: [Jiyuwang@cioc.ac.cn](mailto:Jiyuwang@cioc.ac.cn).

<sup>b</sup> University of Chinese Academy of Sciences, Beijing 100049, P. R. China.

<sup>c</sup> Department of Chemistry, Xihua University, Chengdu 610039, P. R. China

### Contents

|                                                                     |            |
|---------------------------------------------------------------------|------------|
| 1. General Information                                              | S2         |
| 2. Substrate of Synthesis                                           | S2-S4      |
| 3. Typical Synthesis Procedure of <b>3a</b>                         | S4         |
| 4. Optimization of the Reaction Conditions                          | S4-S5      |
| 5. Scale-up Reaction                                                | S5         |
| 6. Typical Synthesis Procedure of <b>4a</b>                         | S5-S6      |
| 7. Characterization of <b>3</b> , <b>4a</b> , <b>4b</b> , <b>5a</b> | S6-<br>S22 |
| 8. X-Ray Analysis                                                   | S22-S26    |
| 9. References                                                       | S27        |
| 10. Copies of NMR Spectra                                           | S28-S108   |

## 1. General Information:

All template reaction experiments were carried out under atmospheric conditions. Commercially available reagents were used without further purification. Solvents were treated prior to use according to the standard methods.  $^1\text{H}$  NMR,  $^{13}\text{C}$  NMR and  $^{19}\text{F}$  NMR spectra were recorded at 300 or 400MHz on an Agilent spectrometer.  $\text{CDCl}_3$  was used as solvent. Chemical shifts were referenced relative to residual solvent. Coupling constants (J) were reported in Hertz (Hz). Thin layer chromatography was carried out in the ultraviolet light using a GF-254 silica gel plate. Melting points were measured with micro melting point apparatus. HRMS were performed on an Agilent 6210 ESI/TOF.

## 2. Substrate of synthesis:

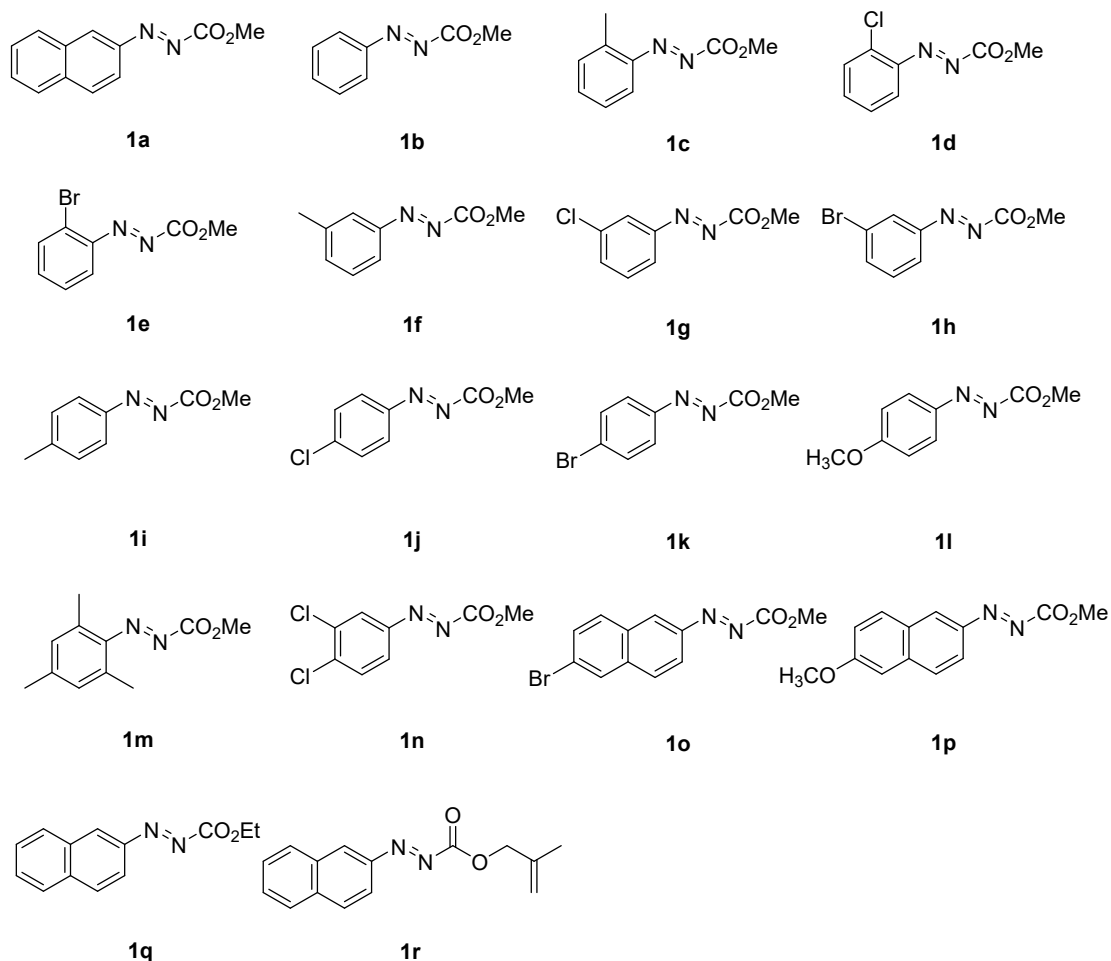

All starting materials **1a-1q** are known compounds and are prepared according to literature. <sup>[1]</sup>**1r** is new compound and is prepared according to literatures. <sup>[2]</sup>

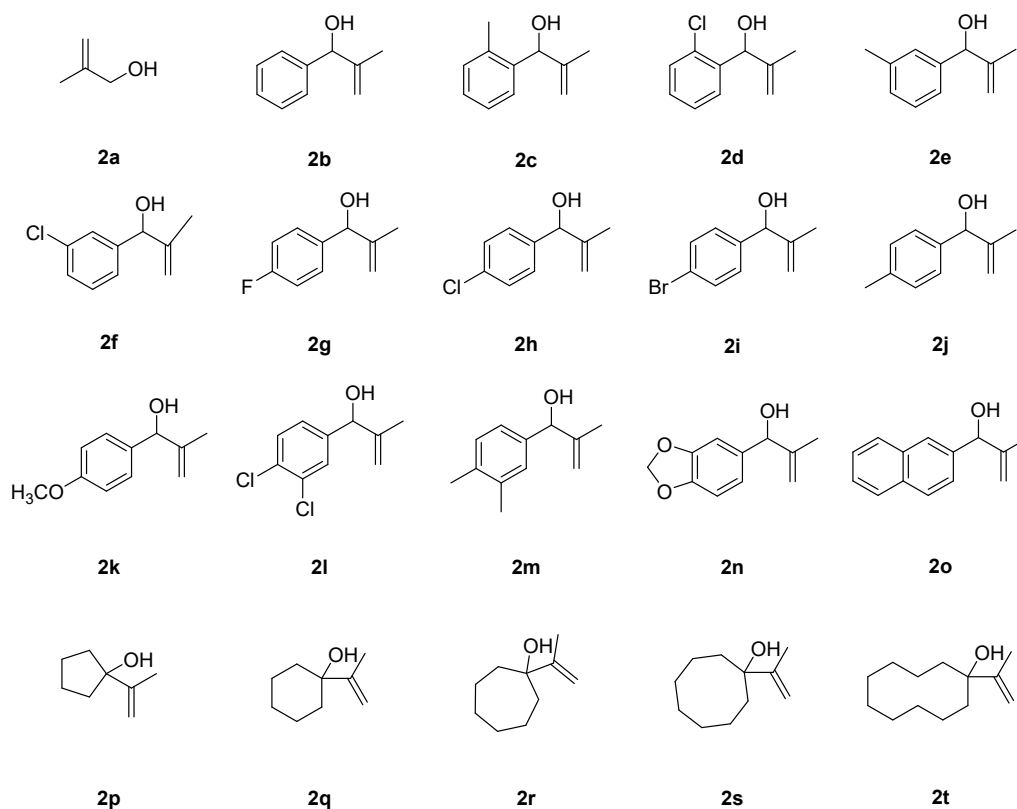

All starting materials **2a-2t** are known compounds. **2a** is commercially available. **2b-2t** are prepared according to literature.<sup>[3]</sup>

### Ethyl (E)-2-(naphthalen-2-yl)diazene-1-carboxylate (**1q**)

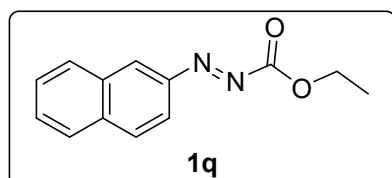

<sup>1</sup>H NMR (400 MHz, CDCl<sub>3</sub>): δ 8.60 (d, *J* = 1.82 Hz, 1H), 8.03 (d, *J* = 7.87 Hz, 1H), 7.92 – 7.87 (m, 3H), 7.65 – 7.56 (m, 2H), 4.56 (t, *J* = 7.14 Hz, 2H), 1.49 (t, *J* = 7.12 Hz, 3H).

<sup>13</sup>C NMR (101 MHz, CDCl<sub>3</sub>): δ 162.2, 149.3, 136.1, 133.1, 130.0, 129.5, 129.1, 128.1, 127.2, 115.5, 64.4, 14.2.

HRMS (ESI-TOF) *m/z*: [M + Na]<sup>+</sup> Calcd for C<sub>13</sub>H<sub>12</sub>N<sub>2</sub>O<sub>2</sub>Na 251.0796; found 251.0797.

### 2-methylallyl (E)-2-(naphthalen-2-yl)diazene-1-carboxylate (**1r**)

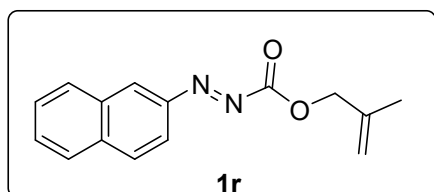

Yellow liquid, yield: 65%; *R*<sub>f</sub> = 0.51 (EtOAc/Petroleum ether 1:7).

<sup>1</sup>H NMR (400 MHz, CDCl<sub>3</sub>): δ 8.58 (s, 1H), 8.00 (d, *J* = 7.90 Hz, 1H), 7.94 – 7.83 (m,

3H), 7.63 – 7.52 (m, 2H), 5.18 (s, 1H), 5.07 (s, 1H), 4.90 (s, 2H), 1.88 (s, 3H).  
 $^{13}\text{C}$  NMR (101 MHz,  $\text{CDCl}_3$ ):  $\delta$  162.2, 149.3, 138.7, 136.1, 133.1, 132.5, 130.0, 129.5, 129.1, 128.1, 127.3, 115.3, 114.7, 71.3, 19.5.  
 HRMS (ESI-TOF)  $m/z$ :  $[\text{M} + \text{Na}]^+$  Calcd for  $\text{C}_{15}\text{H}_{14}\text{N}_2\text{O}_2\text{Na}$  277.0947; found 277.0948.

### 3. Typical Procedure for Synthesis of 3a:

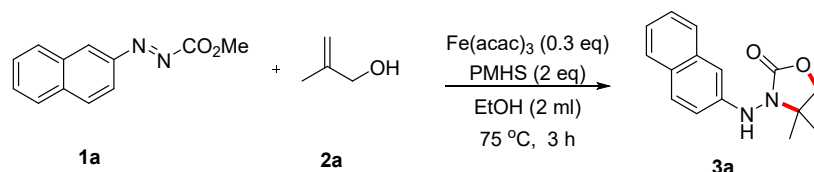

$\text{Fe}(\text{acac})_3$  (32 mg, 0.09 mmol) and methyl-2-(naphthalen-2-yl)diazeno-1-carboxylate **1a** (64.2 mg, 0.3 mmol) are added to the reaction tube and dissolve with ethanol (2 ml). Afterwards, 2-Methyl-2-propen-1-ol **2a** (64.9 mg, 0.9 mmol), and PMHS (36 mg, 0.6 mmol) were added via syringe. The solution was heated to 75 °C for 3 h. After the reaction completed and quenched with water, then ethyl acetate extracted the solution. Finally, the purification by column chromatography on silica gel using ethyl acetate/petroleum ether (v/v, 1:4) as eluent to give **3a** as a white solid. (70 mg, 91% yield).

### 4. Optimization of the Reaction Conditions.

Table 1. Optimization of the Reaction Conditions <sup>a, b</sup>

| entry | Variation from the Standard Conditions                                                     | Yield (%)<br><b>3a</b> |
|-------|--------------------------------------------------------------------------------------------|------------------------|
| 1     | None                                                                                       | 91                     |
| 2     | Without $\text{Fe}(\text{acac})_3$                                                         | 0                      |
| 3     | $\text{Fe}_2(\text{ox})_3 \cdot 6\text{H}_2\text{O}$ instead of $\text{Fe}(\text{acac})_3$ | 0                      |
| 4     | $\text{Cu}(\text{acac})_2$ instead of $\text{Fe}(\text{acac})_3$                           | 0                      |
| 5     | $\text{Co}(\text{acac})_2$ instead of $\text{Fe}(\text{acac})_3$                           | 0                      |
| 6     | $\text{Ni}(\text{acac})_2$ instead of $\text{Fe}(\text{acac})_3$                           | 0                      |
| 7     | $\text{Pd}(\text{OAc})_2$ instead of $\text{Fe}(\text{acac})_3$                            | 0                      |
| 8     | $\text{FeCl}_3$ instead of $\text{Fe}(\text{acac})_3$                                      | 0                      |
| 9     | $\text{PhSiH}_3$ instead of PMHS                                                           | 50                     |
| 10    | $(\text{EtO})_3\text{SiH}$ instead of PMHS                                                 | 86                     |
| 11    | $\text{Et}_3\text{SiH}$ instead of PMHS                                                    | 0                      |

|    |                                    |       |
|----|------------------------------------|-------|
| 12 | NaBH <sub>4</sub> instead of PMHS  | 0     |
| 13 | THF instead of EtOH                | 30    |
| 14 | CH <sub>3</sub> CN instead of EtOH | 15    |
| 15 | CH <sub>3</sub> OH instead of EtOH | 31    |
| 16 | Toluene instead of EtOH            | 0     |
| 17 | At 90 °C,                          | 58    |
| 18 | At 60 °C,                          | trace |
| 19 | Fe(acac) <sub>3</sub> (20 mol %)   | 38    |
| 20 | Fe(acac) <sub>3</sub> (40 mol %)   | 78    |
| 21 | PMHS (2 equiv)                     | 68    |
| 22 | PMHS (4 equiv)                     | 62    |

<sup>a</sup> Reaction conditions: **1a** (0.1 mmol), **2a** (0.3 mmol), catalyst (30 mol %), reductant (2 equiv), solvent (2 mL), 75 °C, 3h; <sup>b</sup> yield refers to isolated product.

## 5. Scale-up Reaction

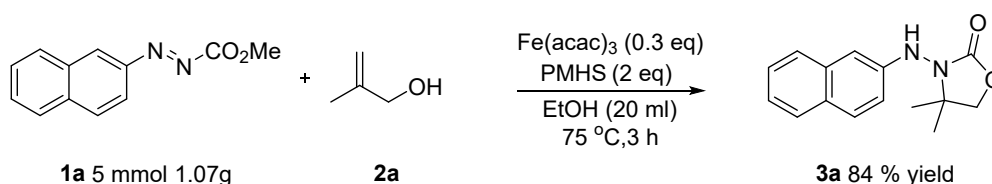

Fe(acac)<sub>3</sub> (529 mg, 0.3 eq) and methyl-2-(naphthalen-2-yl)diazene-1-carboxylate **1a** (1070 mg, 5 mmol) are added to the reaction tube and dissolve with ethanol (20 ml). Afterwards, 2-Methyl-2-propen-1-ol **2a** (1081 mg, 3 eq), and PMHS (600 mg, 2 eq) were added via syringe. The solution was heated to 75 °C for 3 h. After the reaction completed and quenched with water, then ethyl acetate extracted the solution. Finally, the purification by column chromatography on silica gel using ethyl acetate/petroleum ether (v/v, 1:4) as eluent to give **3a** as a white solid. (1075 mg, 84% yield).

## 6. Typical Procedure for Synthesis of 4a,4b

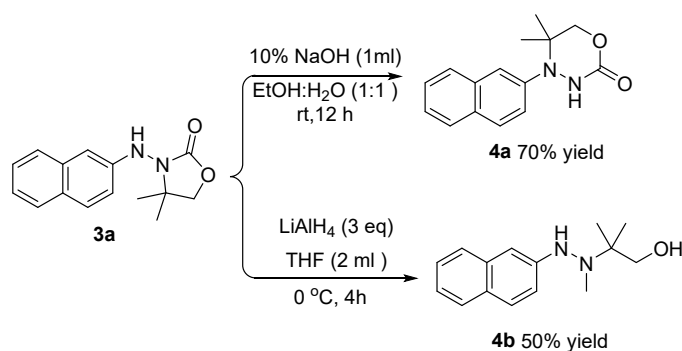

**4a:** Oxazolidinone **3a** (51.2 mg, 0.2 mmol), 10% NaOH aqueous solution (1.0 mL) and EtOH (1 mL) was added. The reaction mixture was stirred for 12 h at room temperature (monitored by TLC). After the reaction completed and then extracted with EtOAc three times. Finally, the purification by column chromatography on silica gel using ethyl acetate/petroleum ether (v/v, 1:1) as eluent to give **4a** as a white solid. (35.8 mg, 70% yield).

**4b:** Oxazolidinone **3a** (51.2 mg, 0.2 mmol), LiAlH<sub>4</sub> (24 mg, 3 eq) was added and dissolve with THF (2 ml) under argon atmosphere. The reaction mixture was stirred for 4 h at 0 °C (monitored by TLC). After the reaction completed and then extracted with EtOAc three times. Finally, the purification by column chromatography on silica gel using ethyl acetate/petroleum ether (v/v, 1:5) as eluent to give **4a** as a colorless liquid. (24.4 mg, 50% yield).

## 7. Characterization of 3, 4a, 4b, 5a:

### 4,4-dimethyl-3-(naphthalen-2-ylamino) oxazolidin-2-one (3a)

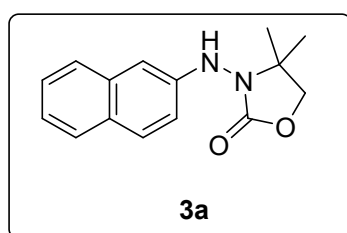

White solid, m.p.124-127 °C, 70 mg, yield: 91%; R<sub>f</sub> = 0.35 (EtOAc/Petroleum ether 1:3).

**<sup>1</sup>H NMR (300 MHz, CDCl<sub>3</sub>):** δ 7.74 – 7.64 (m, 3H), 7.40 (ddd, *J* = 8.24, 6.83, 1.37 Hz, 1H), 7.35 – 7.27 (m, 1H), 7.20 (d, *J* = 2.32 Hz, 1H), 7.07 (dd, *J* = 8.81, 2.34 Hz, 1H), 5.99 (s, 1H), 4.24 (s, 2H), 1.39 (s, 6H).

**<sup>13</sup>C NMR (101 MHz, CDCl<sub>3</sub>):** δ 158.0, 145.1, 134.3, 129.4, 129.1, 127.7, 126.6, 126.4, 123.4, 115.9, 107.5, 74.2, 60.0, 23.5.

**HRMS (ESI-TOF) m/z:** [M + Na]<sup>+</sup> Calcd for C<sub>15</sub>H<sub>16</sub>N<sub>2</sub>O<sub>2</sub>Na 279.1109; found 279.1112.

### 4,4-dimethyl-3-(naphthalen-2-ylamino)-5-phenyloxazolidin-2-one (3b)

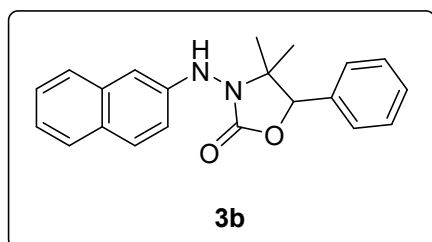

White solid, m.p.184-187 °C, 48 mg, yield: 48 %; R<sub>f</sub> = 0.40 (EtOAc/Petroleum ether 1:3).

**<sup>1</sup>H NMR (400 MHz, CDCl<sub>3</sub>):** δ 7.70 (dt, *J* = 15.52, 7.73 Hz, 3H), 7.43 (q, *J* = 8.05, 7.50 Hz, 6H), 7.34 – 7.25 (m, 2H), 7.10 (d, *J* = 8.79 Hz, 1H), 6.12 (s, 1H), 5.47 (s, 1H), 1.52 (s, 3H), 0.90 (s, 3H).

**<sup>13</sup>C NMR (101 MHz, DMSO-*d*<sub>6</sub>):** δ 156.9, 146.8, 134.8, 129.1, 129.1, 129.0, 128.6, 128.0, 126.8, 126.5, 123.0, 116.2, 105.7, 83.6, 64.2, 23.6, 19.8.

**HRMS (ESI-TOF) m/z:** [M + Na]<sup>+</sup> Calcd for C<sub>21</sub>H<sub>20</sub>N<sub>2</sub>O<sub>2</sub>Na 355.1422; found

355.1429.

### 4,4-dimethyl-3-(naphthalen-2-ylamino)-5-(o-tolyl)oxazolidin-2-one

(3c)

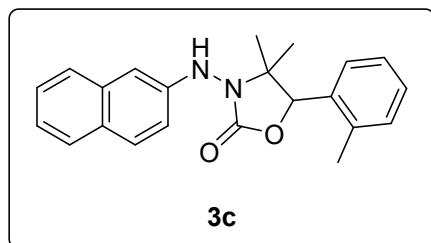

White solid, m.p.220-223 °C, 46 mg, yield: 45 %;  $R_f$  = 0.32 (EtOAc/Petroleum ether 1:3).

$^1\text{H NMR}$  (400 MHz,  $\text{CDCl}_3$ ):  $\delta$  7.79 – 7.58 (m, 3H), 7.55 (d,  $J$  = 6.95 Hz, 1H), 7.37 (dt,  $J$  = 32.38, 7.46 Hz, 4H), 7.25 (d,  $J$  = 6.93 Hz, 2H), 7.07 (d,  $J$  = 8.82 Hz, 1H), 6.38 (s, 1H), 5.75 (s, 1H), 2.42 (s, 3H), 1.54 (s, 3H), 0.99 (s, 3H).

$^{13}\text{C NMR}$  (101 MHz,  $\text{DMSO-}d_6$ ):  $\delta$  156.9, 146.9, 136.0, 134.8, 133.2, 131.2, 129.1, 128.9, 128.6, 128.0, 127.4, 126.8, 126.5, 123.0, 116.2, 105.8, 80.9, 64.4, 24.8, 20.8, 19.8.

HRMS (ESI-TOF)  $m/z$ :  $[\text{M} + \text{Na}]^+$  Calcd for  $\text{C}_{22}\text{H}_{22}\text{N}_2\text{O}_2\text{Na}$  369.1579; found 369.1578.

### 5-(2-chlorophenyl)-4,4-dimethyl-3-(naphthalen-2-ylamino)oxazolidin-2-one (3d)

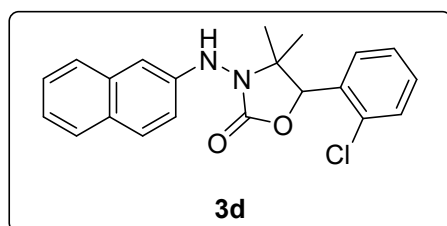

White solid, m.p.240-240 °C, 43 mg, yield: 40 %;  $R_f$  = 0.35 (EtOAc/Petroleum ether 1:3).

$^1\text{H NMR}$  (400 MHz,  $\text{CDCl}_3$ ):  $\delta$  7.77 – 7.64 (m, 3H), 7.41 (dd,  $J$  = 14.15, 5.86 Hz, 4H), 7.34 – 7.25 (m, 3H), 7.10 (dd,  $J$  = 8.73, 2.34 Hz, 1H), 6.05 (s, 1H), 5.42 (s, 1H), 1.54 (s, 3H), 0.91 (s, 3H).

$^{13}\text{C NMR}$  (101 MHz,  $\text{DMSO-}d_6$ ):  $\delta$  156.2, 146.6, 132.1, 130.9, 130.3, 129.1, 128.6, 128.0, 126.7, 126.5, 123.1, 116.1, 105.9, 80.6, 64.1, 25.3, 20.9.

HRMS (ESI-TOF)  $m/z$ :  $[\text{M} + \text{Na}]^+$  Calcd for  $\text{C}_{21}\text{H}_{19}\text{ClN}_2\text{O}_2\text{Na}$  389.1032; found 389.1034.

### 4,4-dimethyl-3-(naphthalen-2-ylamino)-5-(m-tolyl)oxazolidin-2-one

(3e)

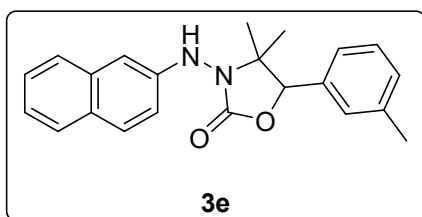

White solid, m.p.176-179 °C, 67 mg, yield: 65 %;  $R_f = 0.36$  (EtOAc/Petroleum ether 1:3).

**$^1\text{H NMR}$  (400 MHz,  $\text{CDCl}_3$ ):**  $\delta$  7.79 – 7.59 (m, 3H), 7.42 (t,  $J = 7.66$  Hz, 1H), 7.31 (dt,  $J = 12.48, 6.33$  Hz, 4H), 7.19 (d,  $J = 8.67$  Hz, 2H), 7.11 (d,  $J = 8.83$  Hz, 1H), 6.01 (s, 1H), 5.43 (s, 1H), 2.42 (s, 3H), 1.53 (s, 3H), 0.91 (s, 3H).

**$^{13}\text{C NMR}$  (101 MHz,  $\text{DMSO-}d_6$ ):**  $\delta$  156.9, 146.8, 138.2, 134.8, 129.7, 129.1, 128.9, 128.6, 128.0, 126.9, 126.8, 126.5, 123.6, 123.0, 116.2, 105.7, 83.6, 64.1, 23.6, 21.5, 19.8.

**HRMS (ESI-TOF)  $m/z$ :**  $[\text{M} + \text{Na}]^+$  Calcd for  $\text{C}_{22}\text{H}_{22}\text{N}_2\text{O}_2\text{Na}$  369.1579; found 369.1573.

### 5-(3-chlorophenyl)-4,4-dimethyl-3-(naphthalen-2-ylamino)oxazolidin-2-one (3f)

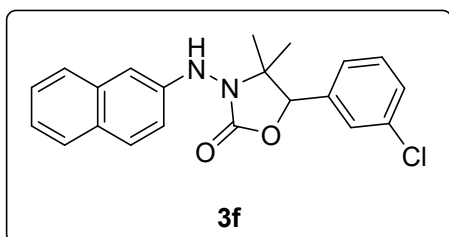

White solid, m.p.175-178 °C, 65 mg, yield: 60 %;  $R_f = 0.32$ (EtOAc/Petroleum ether 1:3).

**$^1\text{H NMR}$  (400 MHz,  $\text{CDCl}_3$ ):**  $\delta$  7.72 (d,  $J = 8.13$  Hz, 1H), 7.67 (d,  $J = 8.50$  Hz, 2H), 7.49 – 7.33 (m, 4H), 7.34 – 7.21 (m, 3H), 7.08 (d,  $J = 8.74$  Hz, 1H), 6.16 (s, 1H), 5.42 (s, 1H), 1.53 (s, 3H), 0.91 (s, 3H).

**$^{13}\text{C NMR}$  (101 MHz,  $\text{DMSO-}d_6$ ):**  $\delta$  156.5, 146.7, 137.4, 134.7, 133.9, 131.0, 129.1, 128.6, 128.0, 126.8, 126.5, 126.2, 125.3, 123.1, 116.2, 105.7, 82.8, 64.1, 23.6, 19.8.

**HRMS (ESI-TOF)  $m/z$ :**  $[\text{M} + \text{Na}]^+$  Calcd for  $\text{C}_{21}\text{H}_{19}\text{ClN}_2\text{O}_2\text{Na}$  389.1032; found 389.1034.

### 5-(4-fluorophenyl)-4,4-dimethyl-3-(naphthalen-2-ylamino)oxazolidin-2-one (3g)

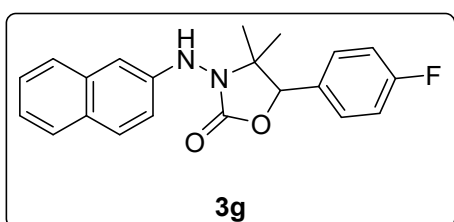



White solid, m.p.180-182 °C, 57 mg, yield: 55 %;  $R_f$  = 0.31 (EtOAc/Petroleum ether 1:3).

**$^1\text{H}$  NMR (400 MHz,  $\text{CDCl}_3$ ):**  $\delta$  7.75 – 7.66 (m, 3H), 7.41 (dt,  $J$  = 8.27, 5.36 Hz, 3H), 7.31 (t,  $J$  = 7.51 Hz, 2H), 7.15 (d,  $J$  = 8.41 Hz, 2H), 7.12 – 7.09 (m, 1H), 6.06 (s, 1H), 5.44 (s, 1H), 1.51 (s, 3H), 0.89 (s, 3H).

**$^{13}\text{C}$  NMR (101 MHz,  $\text{DMSO}-d_6$ ):**  $\delta$  163.8, 161.4, 156.7, 146.8, 134.8, 129.1, 128.8, 128.7, 128.6, 128.0, 126.8, 126.5, 123.0, 116.2, 116.1, 115.8, 105.7, 83.0, 23.5, 19.8.

**$^{19}\text{F}$  NMR (376 MHz,  $\text{DMSO}-d_6$ ):**  $\delta$  -112.55

**HRMS (ESI-TOF)  $m/z$ :**  $[\text{M} + \text{Na}]^+$  Calcd for  $\text{C}_{21}\text{H}_{19}\text{FN}_2\text{O}_2\text{Na}$  373.1328; found 373.1327.

### 5-(4-chlorophenyl)-4,4-dimethyl-3-(naphthalen-2-ylamino)oxazolidin-2-one (3h)

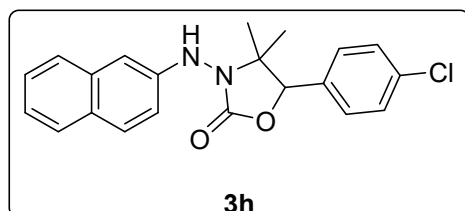

White solid, m.p.151-153 °C, 71 mg, yield: 65 %;  $R_f$  = 0.33 (EtOAc/Petroleum ether 1:3).

**$^1\text{H}$  NMR (400 MHz,  $\text{CDCl}_3$ ):**  $\delta$  7.78 – 7.63 (m, 3H), 7.50 – 7.39 (m, 3H), 7.39 – 7.20 (m, 5H), 7.11 (d,  $J$  = 8.79 Hz, 1H), 5.97 (s, 1H), 5.43 (s, 1H), 1.52 (s, 3H), 0.90 (s, 3H).

**$^{13}\text{C}$  NMR (101 MHz,  $\text{DMSO}-d_6$ ):**  $\delta$  156.6, 146.7, 134.8, 133.7, 129.1, 128.6, 128.4, 128.0, 126.8, 126.5, 123.0, 116.2, 105.7, 82.9, 64.0, 23.4, 19.7.

**HRMS (ESI-TOF)  $m/z$ :**  $[\text{M} + \text{Na}]^+$  Calcd for  $\text{C}_{21}\text{H}_{19}\text{ClN}_2\text{O}_2\text{Na}$  389.1032; found 389.1036.

### 5-(4-bromophenyl)-4,4-dimethyl-3-(naphthalen-2-ylamino)oxazolidine-2-one (3i)

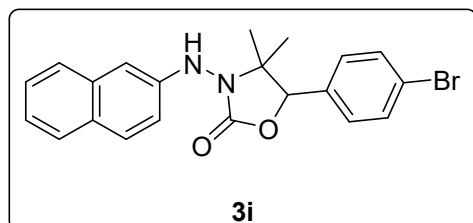

White solid, m.p.160-162 °C, 67 mg, yield: 55 %;  $R_f$  = 0.35 (EtOAc/Petroleum ether 1:3).

**$^1\text{H}$  NMR (400 MHz,  $\text{CDCl}_3$ ):**  $\delta$  7.79 – 7.71 (m, 2H), 7.68 (d,  $J$  = 8.30 Hz, 1H), 7.59 (d,  $J$  = 8.07 Hz, 2H), 7.42 (t,  $J$  = 7.60 Hz, 1H), 7.31 (dd,  $J$  = 12.30, 7.92 Hz, 4H), 7.11 (d,  $J$  = 8.81 Hz, 1H), 5.95 (s, 1H), 5.42 (s, 1H), 1.52 (s, 3H), 0.90 (s, 3H).

**$^{13}\text{C}$  NMR (101 MHz,  $\text{DMSO}-d_6$ ):**  $\delta$  156.6, 146.7, 134.7, 132.0, 129.1, 128.7, 128.6,

128.0, 126.8, 126.5, 123.0, 122.3, 116.2, 105.7, 82.9, 64.0, 23.5, 19.8.

**HRMS (ESI-TOF) m/z:**  $[M + Na]^+$  Calcd for  $C_{21}H_{19}BrN_2O_2Na$  433.0527; found 433.0528.

#### 4,4-dimethyl-3-(naphthalen-2-ylamino)-5-(p-tolyl)oxazolidin-2-one

(3j)

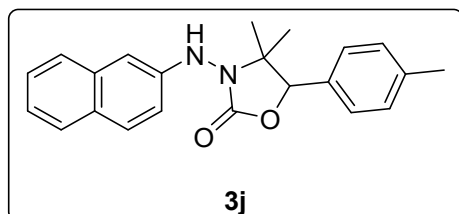

White solid, m.p.157-159 °C, 62 mg, yield: 60 %;  $R_f$  = 0.32 (EtOAc/Petroleum ether 1:3).

**$^1H$  NMR (400 MHz,  $CDCl_3$ ):**  $\delta$  7.73 (d,  $J$  = 8.53 Hz, 2H), 7.68 (d,  $J$  = 8.33 Hz, 1H), 7.42 (t,  $J$  = 7.57 Hz, 1H), 7.32 – 7.24 (m, 7H), 7.12 (d,  $J$  = 8.88 Hz, 1H), 5.95 (s, 1H), 5.43 (s, 1H), 2.40 (s, 3H), 1.51 (s, 3H), 0.90 (s, 3H).

**$^{13}C$  NMR (101 MHz,  $DMSO-d_6$ ):**  $\delta$  156.9, 146.8, 138.4, 134.8, 129.6, 129.1, 128.6, 128.0, 126.7, 126.5, 123.0, 116.2, 105.7, 83.7, 64.2, 23.6, 21.2, 19.8.

**HRMS (ESI-TOF) m/z:**  $[M + Na]^+$  Calcd for  $C_{22}H_{22}N_2O_2Na$  369.1579; found 369.1584.

#### 5-(4-methoxyphenyl)-4,4-dimethyl-3-(naphthalen-2-ylamino)

oxazolidine-2-one (3k)

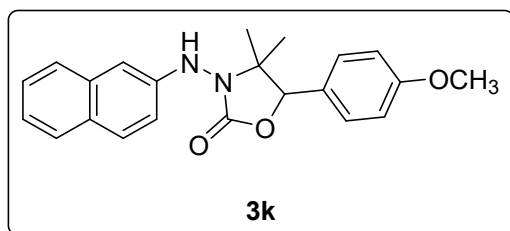

White solid, m.p.184-186 °C, 54 mg, yield: 50 %;  $R_f$  = 0.35 (EtOAc/Petroleum ether 1:3).

**$^1H$  NMR (400 MHz,  $CDCl_3$ ):**  $\delta$  7.70 (dt,  $J$  = 14.68, 7.24 Hz, 3H), 7.41 (t,  $J$  = 7.58 Hz, 1H), 7.35 – 7.22 (m, 4H), 7.10 (d,  $J$  = 8.88 Hz, 1H), 6.96 (d,  $J$  = 8.16 Hz, 2H), 6.12 (s, 1H), 5.41 (s, 1H), 3.85 (s, 3H), 1.49 (s, 3H), 0.91 (s, 3H).

**$^{13}C$  NMR (101 MHz,  $DMSO-d_6$ ):**  $\delta$  159.9, 157.0, 146.8, 134.8, 129.1, 128.6, 128.0, 126.7, 126.5, 123.0, 116.2, 114.4, 105.7, 83.6, 64.1, 55.6, 23.6, 19.7.

**HRMS (ESI-TOF) m/z:**  $[M + Na]^+$  Calcd for  $C_{22}H_{22}N_2O_3Na$  385.1528; found 385.1531.

#### 5-(3,4-dichlorophenyl)-4,4-dimethyl-3-(naphthalen-2-ylamino)

oxazolidin-2-one (3l)

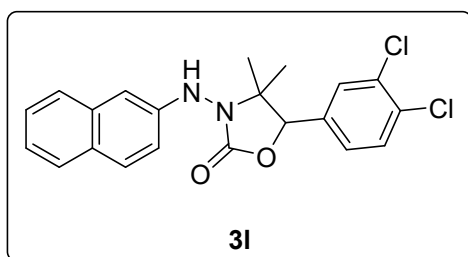

White solid, m.p.194-196 °C, 54 mg, yield: 45 %;  $R_f$  = 0.40 (EtOAc/Petroleum ether 1:3).

**$^1\text{H NMR}$  (400 MHz,  $\text{CDCl}_3$ ):**  $\delta$  7.71 (dt,  $J$  = 16.06, 7.93 Hz, 3H), 7.65 – 7.37 (m, 3H), 7.32 (t,  $J$  = 7.48 Hz, 1H), 7.26 – 7.22 (m, 2H), 7.10 (d,  $J$  = 8.76 Hz, 1H), 6.00 (s, 1H), 5.40 (s, 1H), 1.53 (s, 3H), 0.92 (s, 3H).

**$^{13}\text{C NMR}$  (101 MHz,  $\text{DMSO}-d_6$ ):**  $\delta$  156.3, 146.6, 134.7, 132.0, 131.8, 131.4, 129.1, 128.6, 128.0, 126.9, 126.8, 126.5, 123.1, 116.2, 105.7, 82.2, 64.0, 23.6, 19.7.

**HRMS (ESI-TOF)  $m/z$ :**  $[\text{M} + \text{Na}]^+$  Calcd for  $\text{C}_{21}\text{H}_{18}\text{Cl}_2\text{N}_2\text{O}_2\text{Na}$  423.0643; found 423.0648.

**5-(3,4-dimethylphenyl)-4,4-dimethyl-3-(naphthalen-2-ylamino) oxazolidin-2-one (3m)**

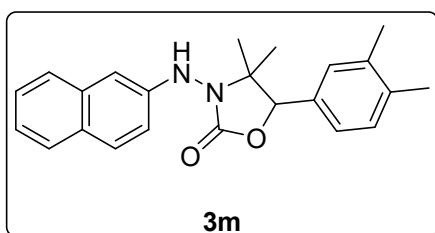

White solid, m.p.178-180 °C, 59 mg, yield: 55%;  $R_f$  = 0.35 (EtOAc/Petroleum ether 1:3).

**$^1\text{H NMR}$  (400 MHz,  $\text{CDCl}_3$ ):**  $\delta$  7.71 (dd,  $J$  = 22.52, 8.35 Hz, 3H), 7.42 (t,  $J$  = 7.54 Hz, 1H), 7.35 – 7.26 (m, 3H), 7.24 – 7.05 (m, 4H), 5.92 (s, 1H), 5.40 (s, 1H), 2.31 (d,  $J$  = 6.23 Hz, 6H), 1.51 (s, 3H), 0.91 (s, 3H).

**$^{13}\text{C NMR}$  (101 MHz,  $\text{DMSO}-d_6$ ):**  $\delta$  156.9, 146.9, 137.1, 136.9, 134.8, 130.0, 129.1, 128.6, 128.0, 127.5, 126.8, 126.5, 123.9, 123.0, 116.2, 105.7, 83.7, 64.2, 23.6, 19.9, 19.6.

**HRMS (ESI-TOF)  $m/z$ :**  $[\text{M} + \text{Na}]^+$  Calcd for  $\text{C}_{23}\text{H}_{24}\text{N}_2\text{O}_2\text{Na}$  383.1735; found 383.1741.

**5-(benzo[d][1,3]dioxol-5-yl)-4,4-dimethyl-3-(naphthalen-2-ylamino) oxazolidin-2-one (3n)**

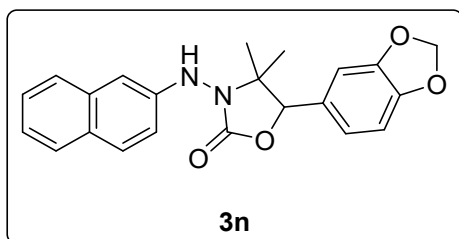

White solid, m.p.190-192 °C, 67 mg, yield: 60 %;  $R_f$  = 0.31 (EtOAc/Petroleum ether 1:3).

$^1\text{H NMR}$  (300 MHz,  $\text{CDCl}_3$ ):  $\delta$  7.74 – 7.62 (m, 3H), 7.41 (ddd,  $J$  = 8.23, 6.81, 1.34 Hz, 1H), 7.35 – 7.25 (m, 2H), 7.08 (dd,  $J$  = 8.85, 2.31 Hz, 1H), 6.89 (d,  $J$  = 15.71 Hz, 3H), 6.21 (s, 1H), 6.02 (s, 2H), 5.36 (s, 1H), 1.48 (s, 3H), 0.93 (s, 3H).

$^{13}\text{C NMR}$  (101 MHz,  $\text{DMSO}-d_6$ ):  $\delta$  156.8, 148.0, 147.9, 146.8, 134.8, 129.1, 128.6, 128.0, 126.7, 126.5, 123.0, 120.2, 116.2, 108.8, 107.0, 105.7, 101.8, 83.6, 64.2, 23.6, 19.7.

HRMS (ESI-TOF)  $m/z$ :  $[\text{M} + \text{Na}]^+$  Calcd for  $\text{C}_{22}\text{H}_{20}\text{N}_2\text{O}_4\text{Na}$  399.1320; found 399.1313.

#### 4,4-dimethyl-3-(naphthalen-2-ylamino)-1-oxa-3-azaspiro[4.4]nonan-2-one (3o)

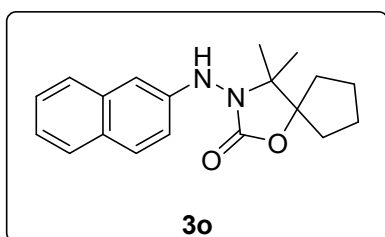

White solid, m.p.211-214 °C, 30 mg, yield: 32 %;  $R_f$  = 0.30 (EtOAc/Petroleum ether 1:3).

$^1\text{H NMR}$  (400 MHz,  $\text{CDCl}_3$ ):  $\delta$  7.68 (dd,  $J$  = 22.32, 8.34 Hz, 3H), 7.39 (t,  $J$  = 7.60 Hz, 1H), 7.29 (d,  $J$  = 7.69 Hz, 1H), 7.19 (s, 1H), 7.11 – 7.00 (m, 1H), 6.03 (s, 1H), 2.03 (d,  $J$  = 52.38 Hz, 4H), 1.85 (d,  $J$  = 24.10 Hz, 4H), 1.30 (s, 6H).

$^{13}\text{C NMR}$  (101 MHz,  $\text{CDCl}_3$ ):  $\delta$  158.1, 145.5, 134.3, 129.5, 129.1, 127.7, 126.6, 126.4, 123.4, 115.9, 107.8, 95.7, 64.1, 22.7, 20.6.

HRMS (ESI-TOF)  $m/z$ :  $[\text{M} + \text{Na}]^+$  Calcd for  $\text{C}_{19}\text{H}_{22}\text{N}_2\text{O}_2\text{Na}$  333.1579; found 333.1585.

#### 4,4-dimethyl-3-(naphthalen-2-ylamino)-1-oxa-3-azaspiro[4.5]decan-2-one (3p)

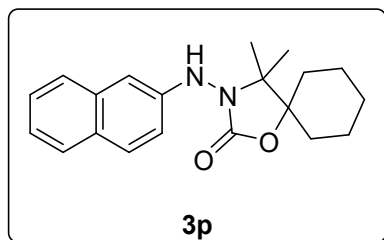

White solid, m.p.216-218 °C, 43 mg, yield: 45 %;  $R_f = 0.32$ (EtOAc/Petroleum ether 1:3).

**$^1\text{H NMR}$  (400 MHz,  $\text{CDCl}_3$ ):**  $\delta$  7.72 – 7.55 (m, 3H), 7.38 (t,  $J = 7.52$  Hz, 1H), 7.30 – 7.25 (m, 1H), 7.18 (s, 1H), 7.04 (dd,  $J = 8.85, 2.25$  Hz, 1H), 6.14 (s, 1H), 2.16 (d,  $J = 88.91$  Hz, 2H), 1.95 – 1.58 (m, 6H), 1.47 (d,  $J = 24.60$  Hz, 2H), 1.23 (s, 6H).

**$^{13}\text{C NMR}$  (101 MHz,  $\text{CDCl}_3$ ):**  $\delta$  158.2, 145.8, 134.3, 129.4, 129.1, 127.7, 126.6, 126.3, 123.3, 115.9, 107.6, 84.7, 65.9, 25.2, 21.8, 19.9.

**HRMS (ESI-TOF)  $m/z$ :**  $[\text{M} + \text{Na}]^+$  Calcd for  $\text{C}_{20}\text{H}_{24}\text{N}_2\text{O}_2\text{Na}$  347.1735; found 347.1732.

#### 4,4-dimethyl-3-(naphthalen-2-ylamino)-1-oxa-3-azaspiro [4.6] undecane-2-one (3q)

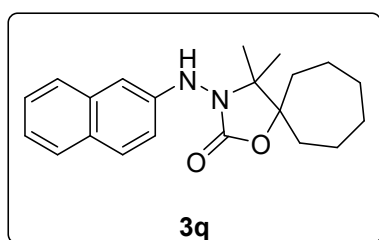

White solid, m.p.220-224 °C, 36 mg, yield: 36 %;  $R_f = 0.32$  (EtOAc/Petroleum ether 1:3).

**$^1\text{H NMR}$  (400 MHz,  $\text{CDCl}_3$ ):**  $\delta$  7.77 – 7.61 (m, 3H), 7.39 (t,  $J = 7.54$  Hz, 1H), 7.33 – 7.26 (m, 1H), 7.20 (s, 1H), 7.07 (dd,  $J = 8.87, 2.29$  Hz, 1H), 5.92 (d,  $J = 5.99$  Hz, 1H), 2.15 (dd,  $J = 14.40, 8.65$  Hz, 2H), 1.96 – 1.72 (m, 4H), 1.58 (s, 6H), 1.26 (s, 6H).

**$^{13}\text{C NMR}$  (101 MHz,  $\text{CDCl}_3$ ):**  $\delta$  145.8, 134.3, 129.5, 129.2, 127.7, 126.7, 126.4, 123.5, 116.0, 107.9, 88.8, 66.8, 34.5, 29.8, 22.3, 19.7.

**HRMS (ESI-TOF)  $m/z$ :**  $[\text{M} + \text{Na}]^+$  Calcd for  $\text{C}_{21}\text{H}_{26}\text{N}_2\text{O}_2\text{Na}$  361.1892; found 361.1899.

#### 4,4-dimethyl-3-(naphthalen-2-ylamino)-1-oxa-3-azaspiro[4.7]

#### dodecan-2-one (3r)

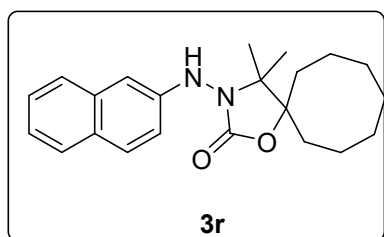

White solid, m.p.207-210 °C, 44 mg, yield: 42 %;  $R_f = 0.35$  (EtOAc/Petroleum ether 1:3).

**$^1\text{H NMR}$  (400 MHz,  $\text{CDCl}_3$ ):**  $\delta$  7.77 – 7.53 (m, 3H), 7.39 (t,  $J = 7.51$  Hz, 1H), 7.33 – 7.24 (m, 1H), 7.18 (d,  $J = 2.30$  Hz, 1H), 7.03 (dd,  $J = 8.72, 2.29$  Hz, 1H), 6.13 (s, 1H), 2.63 – 1.86 (m, 4H), 1.85 – 1.66 (m, 6H), 1.56 (d,  $J = 14.18$  Hz, 4H), 1.30 (s, 6H).

**$^{13}\text{C NMR}$  (101 MHz,  $\text{CDCl}_3$ ):**  $\delta$  158.1, 145.8, 134.3, 129.4, 129.1, 127.7, 126.6, 126.3, 123.3, 115.9, 107.6, 88.6, 66.3, 25.0, 21.9, 20.8.

**HRMS (ESI-TOF)  $m/z$ :**  $[\text{M} + \text{Na}]^+$  Calcd for  $\text{C}_{22}\text{H}_{22}\text{N}_2\text{O}_2\text{Na}$  375.2048; found 375.2051.

**4,4-dimethyl-3-(naphthalen-2-ylamino)-1-oxa-3-azaspiro[4.9]tetradecan-2-one (3s)**

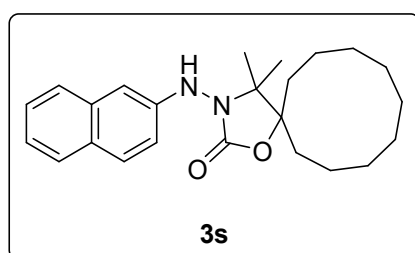

White solid, m.p.215-217 °C, 41 mg, yield: 36 %;  $R_f = 0.36$  (EtOAc/Petroleum ether 1:3).

**$^1\text{H NMR}$  (400 MHz,  $\text{CDCl}_3$ ):**  $\delta$  7.79 – 7.57 (m, 3H), 7.39 (t,  $J = 7.56$  Hz, 1H), 7.30 – 7.24 (m, 1H), 7.19 (s, 1H), 7.05 (dd,  $J = 8.88, 2.15$  Hz, 1H), 6.03 (s, 1H), 2.27 (d,  $J = 14.46$  Hz, 2H), 2.08 (s, 4H), 1.67 (s, 6H), 1.61 (d,  $J = 9.66$  Hz, 6H), 1.30 (s, 6H).

**$^{13}\text{C NMR}$  (101 MHz,  $\text{CDCl}_3$ ):**  $\delta$  158.2, 145.8, 134.3, 129.4, 129.1, 127.7, 126.6, 126.4, 123.4, 116.0, 107.8, 89.2, 66.4, 28.4, 26.9, 26.8, 23.9, 21.0, 20.3.

**HRMS (ESI-TOF)  $m/z$ :**  $[\text{M} + \text{Na}]^+$  Calcd for  $\text{C}_{22}\text{H}_{22}\text{N}_2\text{O}_2\text{Na}$  403.2361; found 403.2361.

**4,4-dimethyl-5-(naphthalen-2-yl)-3-(naphthalen-2-ylamino)oxazolidin-2-one (3t)**

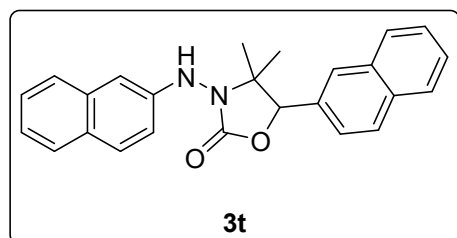

White solid, m.p.190-192 °C, 55 mg, yield: 48 %;  $R_f = 0.35$  (EtOAc/Petroleum ether 1:3).

**$^1\text{H NMR}$  (400 MHz,  $\text{CDCl}_3$ ):**  $\delta$  7.98 – 7.87 (m, 4H), 7.71 (dt,  $J = 17.14, 7.30$  Hz, 3H), 7.56 (dt,  $J = 5.62, 2.72$  Hz, 2H), 7.49 (d,  $J = 8.55$  Hz, 1H), 7.42 (t,  $J = 7.58$  Hz, 1H),

7.32 (d,  $J = 8.58$  Hz, 2H), 7.14 (d,  $J = 8.80$  Hz, 1H), 6.07 (s, 1H), 5.64 (s, 1H), 1.60 (s, 3H), 0.93 (s, 3H).

$^{13}\text{C}$  NMR (101 MHz, DMSO- $d_6$ ):  $\delta$  156.8, 146.8, 134.8, 133.3, 133.1, 129.1, 128.7, 128.6, 128.5, 128.1, 128.0, 127.1, 127.0, 126.8, 126.5, 125.5, 124.2, 123.0, 116.2, 105.7, 83.7, 64.2, 23.8, 20.0.

HRMS (ESI-TOF)  $m/z$ :  $[\text{M} + \text{Na}]^+$  Calcd for  $\text{C}_{25}\text{H}_{22}\text{N}_2\text{O}_2\text{Na}$  405.1579; found 405.1577.

#### 4,4-dimethyl-3-(phenylamino)oxazolidin-2-one (3u)

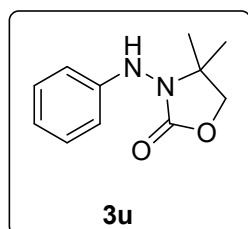

Colorless liquid, 30 mg, yield: 50 %;  $R_f = 30$  (EtOAc/Petroleum ether 1:3).

$^1\text{H}$  NMR (400 MHz,  $\text{CDCl}_3$ ):  $\delta$  7.20 (t,  $J = 7.83$  Hz, 2H), 6.91 – 6.81 (m, 3H), 6.04 (s, 1H), 4.15 (s, 2H), 1.32 (s, 6H).

$^{13}\text{C}$  NMR (101 MHz,  $\text{CDCl}_3$ ):  $\delta$  157.9, 147.4, 129.1, 121.0, 113.3, 74.2, 59.8, 23.5, 14.5.

HRMS (ESI-TOF)  $m/z$ :  $[\text{M} + \text{Na}]^+$  Calcd for  $\text{C}_{13}\text{H}_{14}\text{N}_2\text{O}_2\text{Na}$  229.0953; found 229.0957.

#### 4,4-dimethyl-3-(*o*-tolylamino)oxazolidin-2-one (3v)

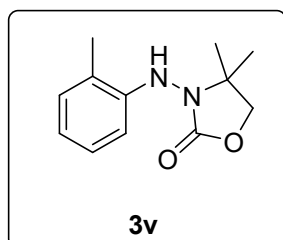

White solid, m.p. 120-123 °C, 49 mg, yield: 75 %;  $R_f = 0.35$  (EtOAc/Petroleum ether 1:3).

$^1\text{H}$  NMR (400 MHz,  $\text{CDCl}_3$ ):  $\delta$  7.12 (t,  $J = 7.75$  Hz, 1H), 7.05 (d,  $J = 7.34$  Hz, 1H), 6.93 (d,  $J = 8.02$  Hz, 1H), 6.84 (t,  $J = 7.39$  Hz, 1H), 5.66 (s, 1H), 4.19 (s, 2H), 2.18 (s, 3H), 1.36 (s, 6H).

$^{13}\text{C}$  NMR (101 MHz,  $\text{CDCl}_3$ ):  $\delta$  157.9, 145.0, 130.5, 126.8, 123.0, 120.9, 111.8, 74.1, 60.0, 23.5, 17.0.

HRMS (ESI-TOF)  $m/z$ :  $[\text{M} + \text{Na}]^+$  Calcd for  $\text{C}_{12}\text{H}_{16}\text{N}_2\text{O}_2\text{Na}$  243.1109; found 243.1104.

#### 3-((2-chlorophenyl)amino)-4,4-dimethyloxazolidin-2-one (3w)

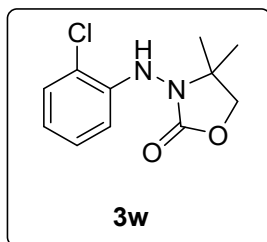

White solid, m.p.167-169 °C, 43 mg, yield: 60 %;  $R_f$  = 0.34 (EtOAc/Petroleum ether 1:3).

**$^1\text{H}$  NMR (400 MHz,  $\text{CDCl}_3$ ):**  $\delta$  7.28 (d,  $J$  = 8.74 Hz, 1H), 7.16 (t,  $J$  = 7.73 Hz, 1H), 6.99 (d,  $J$  = 8.11 Hz, 1H), 6.84 (t,  $J$  = 7.64 Hz, 1H), 6.10 (s, 1H), 4.19 (s, 2H), 1.37 (s, 6H).

**$^{13}\text{C}$  NMR (101 MHz,  $\text{CDCl}_3$ ):**  $\delta$  157.4, 143.2, 129.5, 127.7, 121.5, 119.3, 113.4, 74.2, 60.0 23.4.

**HRMS (ESI-TOF) m/z:**  $[\text{M} + \text{Na}]^+$  Calcd for  $\text{C}_{11}\text{H}_{13}\text{ClN}_2\text{O}_2\text{Na}$  263.0563; found 263.0567.

### 3-((2-bromophenyl)amino)-4,4-dimethyloxazolidin-2-one (3x)

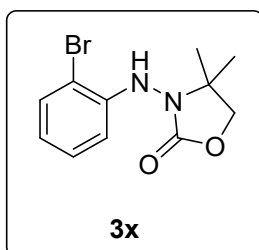

White solid, m.p.184-186 °C, 54 mg, yield: 62 %;  $R_f$  = 0.33 (EtOAc/Petroleum ether 1:3).

**$^1\text{H}$  NMR (400 MHz,  $\text{CDCl}_3$ ):**  $\delta$  7.45 (d,  $J$  = 7.91 Hz, 1H), 7.20 (t,  $J$  = 7.76 Hz, 1H), 6.97 (d,  $J$  = 8.16 Hz, 1H), 6.78 (t,  $J$  = 7.65 Hz, 1H), 6.05 (s, 1H), 4.19 (s, 2H), 1.37 (s, 6H).

**$^{13}\text{C}$  NMR (101 MHz,  $\text{CDCl}_3$ ):**  $\delta$  157.4, 144.1, 132.7, 128.4, 122.1, 113.7, 108.9, 74.1, 60.0, 23.4.

**HRMS (ESI-TOF) m/z:**  $[\text{M} + \text{Na}]^+$  Calcd for  $\text{C}_{11}\text{H}_{13}\text{BrN}_2\text{O}_2\text{Na}$  307.0058; found 307.0061.

### 4,4-dimethyl-3-(m-tolylamino)oxazolidin-2-one (3y)

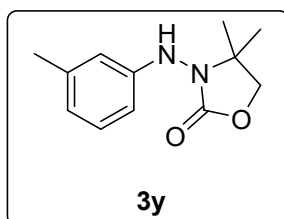

White solid, m.p.108-111 °C, 36 mg, yield: 56 %;  $R_f$  = 0.31 (EtOAc/Petroleum ether 1:3).



**<sup>1</sup>H NMR (400 MHz, CDCl<sub>3</sub>):** δ 7.10 (t, *J* = 8.09 Hz, 1H), 6.81 – 6.56 (m, 3H), 5.94 (s, 1H), 4.16 (s, 2H), 2.28 (s, 3H), 1.33 (s, 6H).

**<sup>13</sup>C NMR (101 MHz, CDCl<sub>3</sub>):** δ 158.0, 147.4, 139.0, 129.0, 122.0, 114.1, 110.4, 74.2, 59.8, 23.5, 21.5.

**HRMS (ESI-TOF) m/z:** [M + Na]<sup>+</sup> Calcd for C<sub>12</sub>H<sub>16</sub>N<sub>2</sub>O<sub>2</sub>Na 243.1109; found 243.1114.

### 3-((3-chlorophenyl)amino)-4,4-dimethyloxazolidin-2-one (3z)

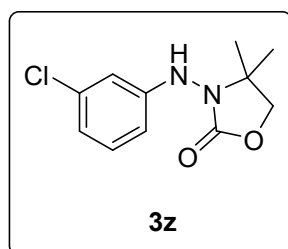

White solid, m.p. 120-123 °C, 49 mg, yield: 69 %; R<sub>f</sub> = 0.32 (EtOAc/Petroleum ether 1:3).

**<sup>1</sup>H NMR (400 MHz, CDCl<sub>3</sub>):** δ 7.08 (t, *J* = 8.29 Hz, 1H), 6.83 (d, *J* = 7.29 Hz, 2H), 6.74 – 6.66 (m, 1H), 6.21 (s, 1H), 4.17 (s, 2H), 1.31 (s, 6H).

**<sup>13</sup>C NMR (101 MHz, CDCl<sub>3</sub>):** δ 157.9, 148.8, 134.9, 130.2, 121.0, 113.2, 111.6, 74.2, 60.0, 23.3.

**HRMS (ESI-TOF) m/z:** [M + Na]<sup>+</sup> Calcd for C<sub>11</sub>H<sub>13</sub>ClN<sub>2</sub>O<sub>2</sub>Na 263.0563; found 263.0568.

### 3-((3-bromophenyl)amino)-4,4-dimethyloxazolidin-2-one (3aa)

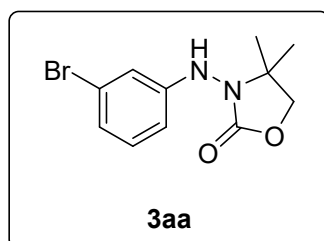

White solid, m.p. 132-134 °C, 54 mg, yield: 64 %; R<sub>f</sub> = 0.32 (EtOAc/Petroleum ether 1:3).

**<sup>1</sup>H NMR (400 MHz, CDCl<sub>3</sub>):** δ 7.28 (d, *J* = 7.93 Hz, 1H), 7.16 (t, *J* = 7.60 Hz, 1H), 6.99 (d, *J* = 8.14 Hz, 1H), 6.85 (t, *J* = 7.65 Hz, 1H), 6.08 (s, 1H), 4.20 (s, 2H), 1.38 (s, 6H).

**<sup>13</sup>C NMR (101 MHz, CDCl<sub>3</sub>):** δ 157.4, 143.2, 129.5, 127.7, 121.5, 119.3, 113.4, 74.1, 60.0, 23.4.

**HRMS (ESI-TOF) m/z:** [M + Na]<sup>+</sup> Calcd for C<sub>11</sub>H<sub>13</sub>BrN<sub>2</sub>O<sub>2</sub>Na 307.0058; found 307.0060.

### 4,4-dimethyl-3-(p-tolylamino)oxazolidin-2-one (3ab)

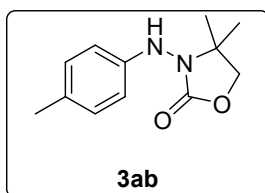

White solid, m.p.97-100 °C, 57 mg, yield: 87 %;  $R_f$  = 0.33 (EtOAc/Petroleum ether 1:3).

$^1\text{H NMR}$  (400 MHz,  $\text{CDCl}_3$ ):  $\delta$  7.03 (d,  $J$  = 8.07 Hz, 2H), 6.79 (d,  $J$  = 8.45 Hz, 2H), 5.77 (s, 1H), 4.15 (s, 2H), 2.27 (s, 3H), 1.33 (s, 6H).

$^{13}\text{C NMR}$  (101 MHz,  $\text{CDCl}_3$ ):  $\delta$  157.9, 145.0, 130.6, 129.6, 113.6, 74.1, 59.8, 23.5, 20.5.

**HRMS (ESI-TOF) m/z:**  $[\text{M} + \text{Na}]^+$  Calcd for  $\text{C}_{12}\text{H}_{16}\text{N}_2\text{O}_2\text{Na}$  243.1109; found 243.1108.

### 3-((4-chlorophenyl)amino)-4,4-dimethyloxazolidin-2-one (3ac)

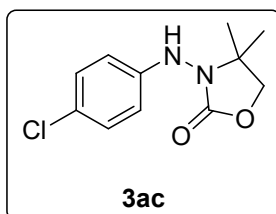

White solid, m.p.105-107 °C, 59 mg, yield: 82 %;  $R_f$  = 0.32 (EtOAc/Petroleum ether 1:3).

$^1\text{H NMR}$  (400 MHz,  $\text{CDCl}_3$ ):  $\delta$  7.12 (d,  $J$  = 8.59 Hz, 2H), 6.75 (d,  $J$  = 8.59 Hz, 2H), 6.18 (s, 1H), 4.15 (s, 2H), 1.30 (s, 6H).

$^{13}\text{C NMR}$  (101 MHz,  $\text{CDCl}_3$ ):  $\delta$  157.9, 146.1, 129.0, 125.7, 114.5, 74.2, 59.9, 23.5.

**HRMS (ESI-TOF) m/z:**  $[\text{M} + \text{Na}]^+$  Calcd for  $\text{C}_{11}\text{H}_{13}\text{ClN}_2\text{O}_2\text{Na}$  263.0563; found 263.0564.

### 3-((4-bromophenyl)amino)-4,4-dimethyloxazolidin-2-one (3ad)

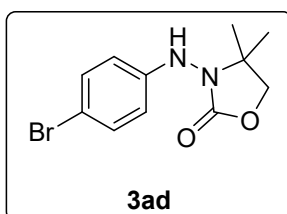

White solid, m.p.110-112 °C, 57 mg, yield: 67 %;  $R_f$  = 0.34 (EtOAc/Petroleum ether 1:3).

$^1\text{H NMR}$  (400 MHz,  $\text{CDCl}_3$ ):  $\delta$  7.26 (d,  $J$  = 8.51 Hz, 2H), 6.70 (d,  $J$  = 8.54 Hz, 2H), 6.20 (s, 1H), 4.15 (s, 2H), 1.30 (s, 6H).

$^{13}\text{C NMR}$  (101 MHz,  $\text{CDCl}_3$ ):  $\delta$  157.9, 146.6, 131.9, 114.9, 112.9, 74.2, 59.9, 23.4, 14.5.

**HRMS (ESI-TOF) m/z:**  $[\text{M} + \text{Na}]^+$  Calcd for  $\text{C}_{11}\text{H}_{13}\text{BrN}_2\text{O}_2\text{Na}$  307.0058; found 307.0063.

### 3-((4-methoxyphenyl)amino)-4,4-dimethyloxazolidin-2-one (3ae)

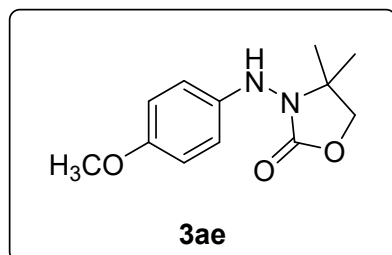

Colorless liquid, 24 mg, yield: 35 %;  $R_f = 0.30$  (EtOAc/Petroleum ether 1:3).

$^1\text{H NMR}$  (400 MHz,  $\text{CDCl}_3$ ):  $\delta$  6.84 – 6.75 (m, 4H), 5.82 (s, 1H), 4.12 (s, 2H), 3.73 (s, 3H), 1.30 (s, 6H).

$^{13}\text{C NMR}$  (101 MHz,  $\text{CDCl}_3$ ):  $\delta$  158.1, 154.6, 141.0, 114.5, 74.1, 59.8, 55.6, 23.5, 14.5.

**HRMS (ESI-TOF) m/z:**  $[\text{M} + \text{Na}]^+$  Calcd for  $\text{C}_{12}\text{H}_{16}\text{N}_2\text{O}_3\text{Na}$  259.1058, found 259.1060.

### 3-((3,4-dichlorophenyl)amino)-4,4-dimethyloxazolidin-2-one (3af)

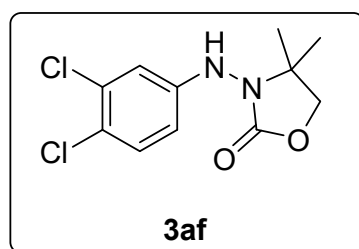

White solid, m.p. 110-112 °C, 41 mg, yield: 50 %;  $R_f = 0.29$  (EtOAc/Petroleum ether 1:3).

$^1\text{H NMR}$  (400 MHz,  $\text{CDCl}_3$ ):  $\delta$  7.21 (d,  $J = 8.71$  Hz, 1H), 6.92 (d,  $J = 2.68$  Hz, 1H), 6.67 – 6.63 (m, 1H), 6.19 (s, 1H), 4.18 (s, 2H), 1.32 (s, 6H).

$^{13}\text{C NMR}$  (101 MHz,  $\text{CDCl}_3$ ):  $\delta$  157.9, 147.1, 133.0, 130.6, 124.0, 114.9, 112.9, 74.2, 60.1, 23.4.

**HRMS (ESI-TOF) m/z:**  $[\text{M} + \text{Na}]^+$  Calcd for  $\text{C}_{11}\text{H}_{12}\text{Cl}_2\text{N}_2\text{O}_2\text{Na}$  297.0173, found 297.0180.

### 3-(mesitylamino)-4,4-dimethyloxazolidin-2-one (3ag)

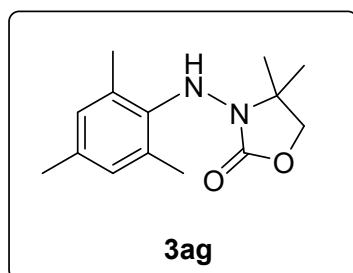

White solid, m.p. 102-104 °C, 37 mg, yield: 50%;  $R_f = 0.28$  (EtOAc/Petroleum ether 1:3).

$^1\text{H NMR}$  (300 MHz,  $\text{CDCl}_3$ ):  $\delta$  6.76 (s, 2H), 5.42 (s, 1H), 3.98 (s, 2H), 2.31 (s, 6H),

2.21 (s, 3H), 1.21 (s, 6H).

$^{13}\text{C}$  NMR (101 MHz,  $\text{CDCl}_3$ ):  $\delta$  157.8, 139.8, 132.2, 130.1, 127.5, 73.0, 60.8, 23.0, 20.5, 18.6.

HRMS (ESI-TOF)  $m/z$ :  $[\text{M} + \text{Na}]^+$  Calcd for  $\text{C}_{14}\text{H}_{20}\text{N}_2\text{O}_2\text{Na}$  271.1422, found 271.1418.

### 3-((6-methoxynaphthalen-2-yl)amino)-4,4-dimethyloxazolidin-2-one

(3ah)

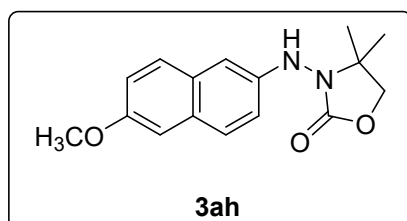

White solid, m.p.131-133 °C, 64 mg, yield: 75 %;  $R_f$  = 0.21 (EtOAc/Petroleum ether 1:3).

$^1\text{H}$  NMR (300 MHz,  $\text{CDCl}_3$ ):  $\delta$  7.56 (dd,  $J$  = 8.80, 4.90 Hz, 2H), 7.16 (d,  $J$  = 2.37 Hz, 1H), 7.07 (ddd,  $J$  = 11.32, 7.16, 2.58 Hz, 3H), 5.93 (s, 1H), 4.22 (s, 2H), 3.89 (s, 3H), 1.38 (s, 6H).

$^{13}\text{C}$  NMR (101 MHz,  $\text{CDCl}_3$ ):  $\delta$ 158.0, 156.1, 143.3, 130.4, 129.6, 128.1, 127.9, 119.1, 116.5, 108.4, 106.0, 74.2, 60.0, 55.3, 23.4.

HRMS (ESI-TOF)  $m/z$ :  $[\text{M} + \text{Na}]^+$  Calcd for  $\text{C}_{16}\text{H}_{18}\text{N}_2\text{O}_3\text{Na}$  309.1215, found 309.1216.

### 3-((6-bromonaphthalen-2-yl)amino)-4,4-dimethyloxazolidin-2-one

(3ai)

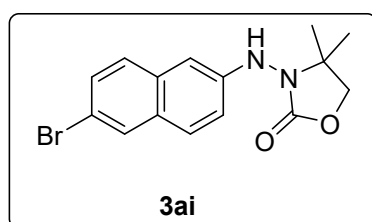

White solid, m.p.145-147 °C, 82 mg, yield: 82%;  $R_f$  = 0.25 (EtOAc/Petroleum ether 1:3).

$^1\text{H}$  NMR (300 MHz,  $\text{CDCl}_3$ ):  $\delta$  7.79 (s, 1H), 7.40 (d,  $J$  = 11.26 Hz, 3H), 7.08 (s, 1H), 6.98 (d,  $J$  = 10.35 Hz, 1H), 6.35 (s, 1H), 4.23 (s, 2H), 1.36 (s, 6H).

$^{13}\text{C}$  NMR (101 MHz,  $\text{CDCl}_3$ ):  $\delta$  158.0, 145.5, 132.7, 130.3, 129.6, 129.6, 128.2, 128.1, 116.8, 116.7, 107.3, 74.3, 60.1, 22.6.

HRMS (ESI-TOF)  $m/z$ :  $[\text{M} + \text{Na}]^+$  Calcd for  $\text{C}_{15}\text{H}_{15}\text{N}_2\text{O}_2\text{BrNa}$  357.0214, found 357.0216.

### 5,5-dimethyl-4-(naphthalen-2-yl)-1,3,4-oxadiazinan-2-one (4a)

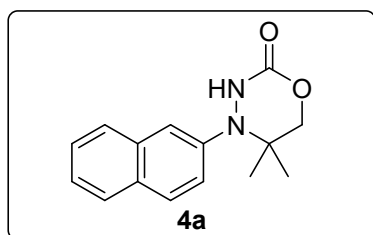

White solid, m.p. 132-135 °C, 38 mg, yield: 70%;  $R_f = 0.50$  (EtOAc/Petroleum ether 1:1).

**$^1\text{H NMR}$  (400 MHz,  $\text{DMSO-}d_6$ ):**  $\delta$  9.37 (s, 1H), 7.95 – 7.79 (m, 3H), 7.58 (s, 1H), 7.46 (p,  $J = 6.84$  Hz, 2H), 7.27 (d,  $J = 8.77$  Hz, 1H), 4.01 (s, 2H), 1.18 (s, 6H).

**$^{13}\text{C NMR}$  (101 MHz,  $\text{DMSO-}d_6$ ):**  $\delta$  151.4, 145.3, 133.5, 131.4, 128.2, 128.1, 127.8, 126.9, 126.0, 125.6, 122.3, 70.5, 54.0, 23.8.

**HRMS (ESI-TOF)  $m/z$ :**  $[\text{M} + \text{Na}]^+$  Calcd for  $\text{C}_{15}\text{H}_{16}\text{N}_2\text{O}_2\text{Na}$  279.1109; found 279.1110.

### 2-methyl-2-(2-(naphthalen-2-yl)hydrazineyl)propan-1-ol (4b)

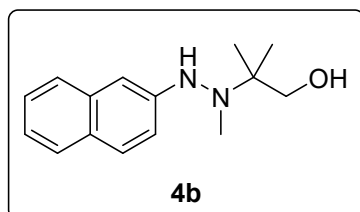

Colorless liquid, 24 mg, yield: 50%;  $R_f = 0.51$  (EtOAc/Petroleum ether 1:3).

**$^1\text{H NMR}$  (300 MHz,  $\text{CDCl}_3$ ):**  $\delta$  7.73 – 7.66 (m, 3H), 7.43 – 7.37 (m, 1H), 7.30 – 7.24 (m, 2H), 7.06 (dd,  $J = 8.86, 2.16$  Hz, 1H), 4.57 (s, 1H), 3.56 (s, 2H), 2.75 (s, 1H), 2.53 (s, 3H), 1.16 (s, 6H).

**$^{13}\text{C NMR}$  (75 MHz,  $\text{CDCl}_3$ ):**  $\delta$  145.7, 134.8, 129.1, 129.0, 127.6, 126.3, 122.8, 116.7, 107.3, 70.4, 60.1, 37.5, 19.4.

**HRMS (ESI-TOF)  $m/z$ :**  $[\text{M} + \text{H}]^+$  Calcd for  $\text{C}_{15}\text{H}_{21}\text{N}_2\text{O}$  245.1648; found 245.1655.

### ethyl 1-(1-((tert-butyldimethylsilyl)oxy)-2-methylpropan-2-yl)-2-(naphthalen-2-yl)hydrazine-1-carboxylate (5a)

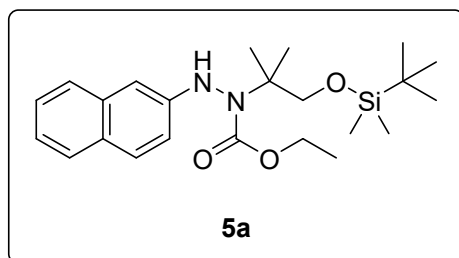

Colorless liquid, 54 mg, yield: 43%;  $R_f = 0.62$  (EtOAc/Petroleum ether 1:7).

**$^1\text{H NMR}$  (300 MHz,  $\text{CDCl}_3$ ):**  $\delta$  7.75 – 7.64 (m, 3H), 7.39 (ddd,  $J = 8.21, 6.83, 1.33$  Hz, 1H), 7.27 – 7.22 (m, 1H), 7.07 – 6.93 (m, 2H), 6.03 (s, 1H), 4.08 (qd,  $J = 7.08, 1.94$

Hz, 2H), 4.00 (d,  $J = 9.68$  Hz, 1H), 3.61 (d,  $J = 9.70$  Hz, 1H), 1.61 (s, 3H), 1.36 (s, 3H), 1.11 (t,  $J = 7.09$  Hz, 3H), 0.96 (s, 9H), 0.09 (d,  $J = 4.60$  Hz, 6H).

$^{13}\text{C}$  NMR (101 MHz,  $\text{CDCl}_3$ ):  $\delta$  157.2, 147.0, 134.7, 128.9, 128.8, 127.7, 126.3, 126.3, 122.7, 115.2, 105.9, 68.3, 63.7, 61.6, 25.9, 24.3, 24.1, 18.2, 14.4.

HRMS (ESI-TOF)  $m/z$ :  $[\text{M} + \text{Na}]^+$  Calcd for  $\text{C}_{23}\text{H}_{36}\text{N}_2\text{O}_3\text{Si}$  439.2392, found 439.2390.

## 8. X-Ray Analysis

Single crystals of  $\text{C}_{15}\text{H}_{16}\text{N}_2\text{O}_2$  **3a** were grown from ethyl acetate and PE. A suitable crystal was selected and collected on a SuperNova, Dual, Cu at zero, AtlasS2 diffractometer. The crystal was kept at 149.99(10) K during data collection. The data were collected and processed using CrysAlisPro. The structures were solved by direct methods using Olex2 software with the SHELXT structure solution program via intrinsic phasing algorithm, and the non-hydrogen atoms were located from the trial structure and then refined anisotropically with SHELXL-2018 using a full-matrix least squares procedure based on  $F^2$ . The weighted  $R$  factor,  $wR$  and goodness-of-fit  $S$  values were obtained based on  $F^2$ . The hydrogen atom positions were fixed geometrically at the calculated distances and allowed to ride on their parent atoms.

Crystallographic data for the structure reported in this paper have been deposited at the Cambridge Crystallographic Data Center and allocated with the deposition numbers: CCDC 2240182 for compounds **3a**

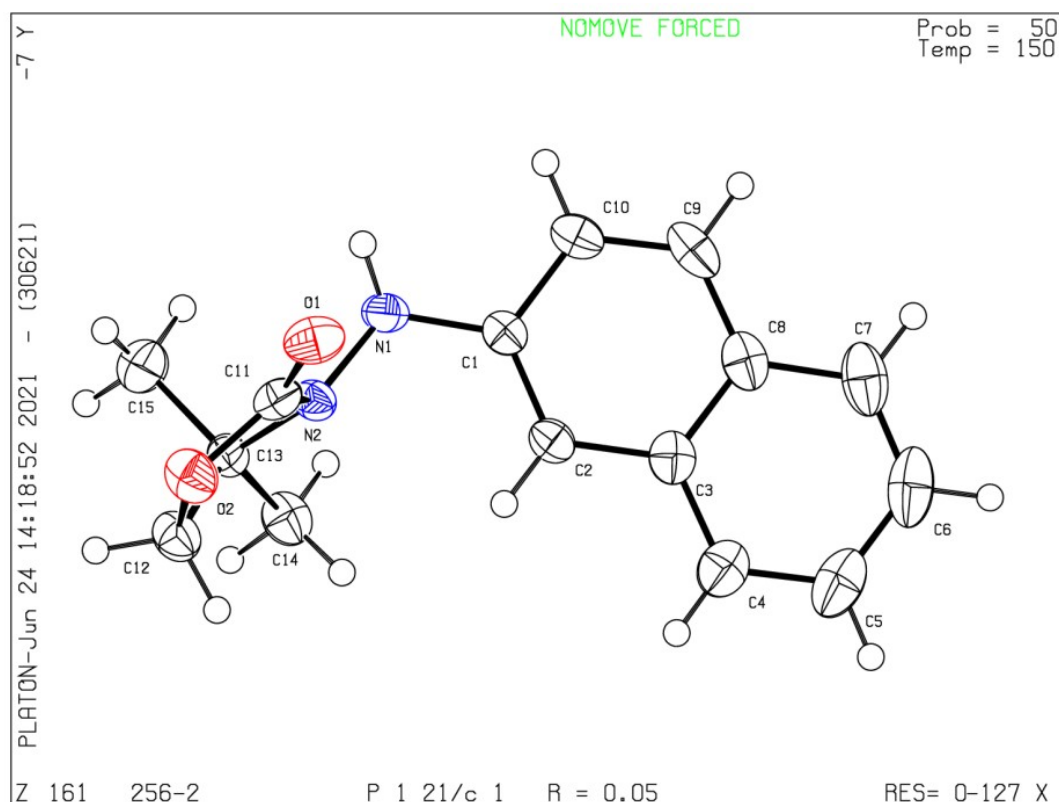

Figure S1. ORTEP Drawing of **3a** (The ellipsoids are shown at 50% probability levels)

**Table 1 Crystal data and structure refinement for 3a.**

|                                             |                                                               |
|---------------------------------------------|---------------------------------------------------------------|
| Identification code                         | <b>3a</b>                                                     |
| Empirical formula                           | C <sub>15</sub> H <sub>16</sub> N <sub>2</sub> O <sub>2</sub> |
| Formula weight                              | 256.30                                                        |
| Temperature/K                               | 149.99(10)                                                    |
| Crystal system                              | monoclinic                                                    |
| Space group                                 | P2 <sub>1</sub> /c                                            |
| a/Å                                         | 10.9803(9)                                                    |
| b/Å                                         | 10.5194(6)                                                    |
| c/Å                                         | 12.5582(12)                                                   |
| α/°                                         | 90                                                            |
| β/°                                         | 112.748(11)                                                   |
| γ/°                                         | 90                                                            |
| Volume/Å <sup>3</sup>                       | 1337.7(2)                                                     |
| Z                                           | 4                                                             |
| ρ <sub>calc</sub> /g/cm <sup>3</sup>        | 1.273                                                         |
| μ/mm <sup>-1</sup>                          | 0.086                                                         |
| F(000)                                      | 544.0                                                         |
| Crystal size/mm <sup>3</sup>                | 0.15 × 0.12 × 0.11                                            |
| Radiation                                   | Mo Kα (λ = 0.71073)                                           |
| 2θ range for data collection/°              | 4.022 to 49.996                                               |
| Index ranges                                | -13 ≤ h ≤ 10, -12 ≤ k ≤ 11, -14 ≤ l ≤ 13                      |
| Reflections collected                       | 6236                                                          |
| Independent reflections                     | 2354 [R <sub>int</sub> = 0.0348, R <sub>sigma</sub> = 0.0459] |
| Data/restraints/parameters                  | 2354/0/178                                                    |
| Goodness-of-fit on F <sup>2</sup>           | 1.069                                                         |
| Final R indexes [I ≥ 2σ (I)]                | R <sub>1</sub> = 0.0453, wR <sub>2</sub> = 0.0920             |
| Final R indexes [all data]                  | R <sub>1</sub> = 0.0641, wR <sub>2</sub> = 0.1046             |
| Largest diff. peak/hole / e Å <sup>-3</sup> | 0.14/-0.21                                                    |

**Table 2 Fractional Atomic Coordinates (×10<sup>4</sup>) and Equivalent Isotropic Displacement Parameters (Å<sup>2</sup>×10<sup>3</sup>) for 3a. U<sub>eq</sub> is defined as 1/3 of the trace of the orthogonalised U<sub>ij</sub> tensor.**

| Atom | x          | y          | z          | U(eq)   |
|------|------------|------------|------------|---------|
| O1   | 4564.6(13) | 9963.4(11) | 3491.1(11) | 37.5(4) |
| O2   | 6146.6(12) | 8977.8(11) | 3071.7(11) | 37.0(4) |
| N1   | 4710.7(14) | 7875.9(15) | 4951.4(14) | 28.8(4) |
| N2   | 5310.8(13) | 7950.1(13) | 4162.1(12) | 25.1(4) |
| C1   | 3415.7(16) | 7399.9(15) | 4547.7(15) | 25.1(4) |
| C2   | 2862.0(16) | 6717.7(16) | 3550.1(15) | 27.5(4) |

**Table 2 Fractional Atomic Coordinates ( $\times 10^4$ ) and Equivalent Isotropic Displacement Parameters ( $\text{\AA}^2 \times 10^3$ ) for 3a.  $U_{\text{eq}}$  is defined as 1/3 of the trace of the orthogonalised  $U_{ij}$  tensor.**

| Atom | x          | y          | z          | U(eq)   |
|------|------------|------------|------------|---------|
| C3   | 1605.9(17) | 6152.9(16) | 3242.3(17) | 30.1(4) |
| C4   | 1034.2(18) | 5393.6(18) | 2245.0(18) | 38.9(5) |
| C5   | -160(2)    | 4821.3(19) | 1989(2)    | 49.4(6) |
| C6   | -855(2)    | 4988(2)    | 2711(2)    | 52.2(6) |
| C7   | -336.1(18) | 5719.6(19) | 3672(2)    | 45.3(6) |
| C8   | 903.8(17)  | 6314.2(17) | 3972.0(18) | 33.2(5) |
| C9   | 1493.6(18) | 7049.4(18) | 4987.3(18) | 37.5(5) |
| C10  | 2710.5(18) | 7571.1(17) | 5271.0(17) | 32.5(5) |
| C11  | 5267.0(17) | 9042.4(17) | 3579.7(16) | 28.9(4) |
| C12  | 6734.7(18) | 7712.9(17) | 3287.4(17) | 34.3(5) |
| C13  | 6537.8(16) | 7234.1(16) | 4358.8(16) | 26.4(4) |
| C14  | 6290.9(18) | 5821.7(17) | 4338.7(18) | 35.0(5) |
| C15  | 7625.6(18) | 7659(2)    | 5470.5(18) | 44.8(5) |

**Table 3 Anisotropic Displacement Parameters ( $\text{\AA}^2 \times 10^3$ ) for 3a. The Anisotropic displacement factor exponent takes the form:  $-2\pi^2[h^2a^{*2}U_{11}+2hka^*b^*U_{12}+\dots]$ .**

| Atom | $U_{11}$ | $U_{22}$ | $U_{33}$ | $U_{23}$ | $U_{13}$ | $U_{12}$ |
|------|----------|----------|----------|----------|----------|----------|
| O1   | 49.3(8)  | 24.3(7)  | 35.6(8)  | -0.9(6)  | 12.9(7)  | 5.6(6)   |
| O2   | 45.6(8)  | 30.3(7)  | 42.0(8)  | 7.0(6)   | 24.8(7)  | -1.7(6)  |
| N1   | 33.6(9)  | 28.6(9)  | 27.4(9)  | -5.2(8)  | 15.2(7)  | -1.3(7)  |
| N2   | 29.8(8)  | 22.9(8)  | 26.4(8)  | 0.2(7)   | 15.1(7)  | -0.8(6)  |
| C1   | 27.9(9)  | 20.9(9)  | 28.5(10) | 4.1(8)   | 13.0(8)  | 4.2(7)   |
| C2   | 28.5(10) | 27.8(10) | 28.1(11) | 2.9(9)   | 13.2(8)  | 4.5(8)   |
| C3   | 27.2(9)  | 24.0(9)  | 36.5(11) | 7.6(9)   | 9.4(9)   | 6.3(8)   |
| C4   | 34.1(11) | 31.8(10) | 43.5(13) | 1.2(10)  | 7.1(9)   | 3.3(9)   |
| C5   | 37.2(12) | 35.6(12) | 58.6(15) | 2.0(11)  | 0.2(11)  | -2.2(9)  |
| C6   | 28.3(11) | 42.8(13) | 75.6(18) | 18.2(13) | 9.3(12)  | -1.0(9)  |
| C7   | 29.3(11) | 40.7(12) | 65.8(16) | 20.2(12) | 18.1(11) | 6.2(9)   |
| C8   | 28.8(10) | 27.6(10) | 44.4(12) | 12.9(10) | 15.4(9)  | 7.9(8)   |
| C9   | 38.7(11) | 37.4(11) | 47.9(13) | 11.6(11) | 29.4(10) | 11.7(9)  |
| C10  | 38.4(11) | 30.7(10) | 32.9(11) | 1.8(9)   | 18.6(9)  | 7.1(8)   |
| C11  | 34.7(10) | 25.2(10) | 24.5(10) | -3.6(8)  | 9.0(8)   | -4.6(8)  |
| C12  | 36.4(10) | 32.0(10) | 40.0(12) | 1.6(9)   | 20.9(9)  | -0.2(8)  |
| C13  | 24.7(9)  | 27.2(9)  | 28.5(10) | -0.8(8)  | 11.7(8)  | 0.6(7)   |
| C14  | 34.8(10) | 30.0(10) | 42.5(12) | 5.6(9)   | 17.4(9)  | 6.2(8)   |
| C15  | 33.0(11) | 57.9(14) | 38.3(12) | -8.6(11) | 8.1(10)  | -1.6(10) |



**Table 4 Bond Lengths for 3a.**

| Atom | Atom | Length/Å   | Atom | Atom | Length/Å |
|------|------|------------|------|------|----------|
| O1   | C11  | 1.216(2)   | C3   | C8   | 1.417(3) |
| O2   | C11  | 1.349(2)   | C4   | C5   | 1.364(3) |
| O2   | C12  | 1.458(2)   | C5   | C6   | 1.403(3) |
| N1   | N2   | 1.3885(19) | C6   | C7   | 1.358(3) |
| N1   | C1   | 1.404(2)   | C7   | C8   | 1.411(3) |
| N2   | C11  | 1.353(2)   | C8   | C9   | 1.416(3) |
| N2   | C13  | 1.479(2)   | C9   | C10  | 1.358(3) |
| C1   | C2   | 1.366(2)   | C12  | C13  | 1.528(3) |
| C1   | C10  | 1.415(2)   | C13  | C14  | 1.509(2) |
| C2   | C3   | 1.411(2)   | C13  | C15  | 1.512(3) |
| C3   | C4   | 1.412(3)   |      |      |          |

**Table 5 Bond Angles for 3a.**

| Atom | Atom | Atom | Angle/°    | Atom | Atom | Atom | Angle/°    |
|------|------|------|------------|------|------|------|------------|
| C11  | O2   | C12  | 107.73(13) | C7   | C8   | C3   | 119.0(2)   |
| N2   | N1   | C1   | 117.13(15) | C7   | C8   | C9   | 122.72(19) |
| N1   | N2   | C13  | 120.36(14) | C9   | C8   | C3   | 118.29(16) |
| C11  | N2   | N1   | 120.41(14) | C10  | C9   | C8   | 121.19(17) |
| C11  | N2   | C13  | 111.26(13) | C9   | C10  | C1   | 120.49(18) |
| N1   | C1   | C10  | 116.88(16) | O1   | C11  | O2   | 122.77(16) |
| C2   | C1   | N1   | 123.23(16) | O1   | C11  | N2   | 127.93(17) |
| C2   | C1   | C10  | 119.72(16) | O2   | C11  | N2   | 109.30(15) |
| C1   | C2   | C3   | 120.91(17) | O2   | C12  | C13  | 105.14(14) |
| C2   | C3   | C8   | 119.39(17) | N2   | C13  | C12  | 96.61(13)  |
| C4   | C3   | C2   | 122.23(17) | N2   | C13  | C14  | 110.65(13) |
| C4   | C3   | C8   | 118.35(17) | N2   | C13  | C15  | 110.32(14) |
| C5   | C4   | C3   | 121.1(2)   | C14  | C13  | C12  | 113.30(16) |
| C4   | C5   | C6   | 120.4(2)   | C14  | C13  | C15  | 112.27(16) |
| C7   | C6   | C5   | 119.95(19) | C15  | C13  | C12  | 112.67(15) |
| C6   | C7   | C8   | 121.2(2)   |      |      |      |            |

**Table 6 Torsion Angles for 3a.**

| A  | B   | C   | D   | Angle/°    | A  | B  | C  | D   | Angle/°    |
|----|-----|-----|-----|------------|----|----|----|-----|------------|
| O2 | C12 | C13 | N2  | 29.39(16)  | C3 | C4 | C5 | C6  | 0.7(3)     |
| O2 | C12 | C13 | C14 | 145.26(14) | C3 | C8 | C9 | C10 | -1.1(3)    |
| O2 | C12 | C13 | C15 | -85.90(17) | C4 | C3 | C8 | C7  | -0.4(3)    |
| N1 | N2  | C11 | O1  | -13.9(3)   | C4 | C3 | C8 | C9  | 178.42(16) |
| N1 | N2  | C11 | O2  | 166.47(14) | C4 | C5 | C6 | C7  | -0.2(3)    |

**Table 6 Torsion Angles for 3a.**

| A  | B  | C   | D   | Angle/°     | A   | B  | C   | D   | Angle/°     |
|----|----|-----|-----|-------------|-----|----|-----|-----|-------------|
| N1 | N2 | C13 | C12 | -177.98(14) | C5  | C6 | C7  | C8  | -0.5(3)     |
| N1 | N2 | C13 | C14 | 64.0(2)     | C6  | C7 | C8  | C3  | 0.8(3)      |
| N1 | N2 | C13 | C15 | -60.8(2)    | C6  | C7 | C8  | C9  | -177.93(18) |
| N1 | C1 | C2  | C3  | 173.60(15)  | C7  | C8 | C9  | C10 | 177.60(17)  |
| N1 | C1 | C10 | C9  | -174.66(16) | C8  | C3 | C4  | C5  | -0.4(3)     |
| N2 | N1 | C1  | C2  | 17.6(2)     | C8  | C9 | C10 | C1  | 0.6(3)      |
| N2 | N1 | C1  | C10 | -167.10(14) | C10 | C1 | C2  | C3  | -1.5(3)     |
| C1 | N1 | N2  | C11 | 94.29(19)   | C11 | O2 | C12 | C13 | -22.42(19)  |
| C1 | N1 | N2  | C13 | -119.51(16) | C11 | N2 | C13 | C12 | -28.96(17)  |
| C1 | C2 | C3  | C4  | -177.00(17) | C11 | N2 | C13 | C14 | -146.94(16) |
| C1 | C2 | C3  | C8  | 1.0(3)      | C11 | N2 | C13 | C15 | 88.20(18)   |
| C2 | C1 | C10 | C9  | 0.8(3)      | C12 | O2 | C11 | O1  | -175.74(17) |
| C2 | C3 | C4  | C5  | 177.62(17)  | C12 | O2 | C11 | N2  | 3.88(19)    |
| C2 | C3 | C8  | C7  | -178.41(16) | C13 | N2 | C11 | O1  | -162.94(18) |
| C2 | C3 | C8  | C9  | 0.4(2)      | C13 | N2 | C11 | O2  | 17.47(19)   |

**Table 7 Hydrogen Atom Coordinates ( $\text{\AA} \times 10^4$ ) and Isotropic Displacement Parameters ( $\text{\AA}^2 \times 10^3$ ) for 3a.**

| Atom | x        | y        | z        | U(eq) |
|------|----------|----------|----------|-------|
| H1   | 4869(18) | 8540(20) | 5397(18) | 38(6) |
| H2   | 3318.81  | 6623.85  | 3066.96  | 33    |
| H4   | 1479.35  | 5281.67  | 1754.55  | 47    |
| H5   | -516.59  | 4317.32  | 1332.26  | 59    |
| H6   | -1671.24 | 4598.42  | 2530.05  | 63    |
| H7   | -806.5   | 5830.71  | 4142.6   | 54    |
| H9   | 1039.72  | 7177.39  | 5468.7   | 45    |
| H10  | 3082.63  | 8044.28  | 5945.73  | 39    |
| H12A | 7666.59  | 7753.6   | 3427.17  | 41    |
| H12B | 6297.05  | 7157.29  | 2634.02  | 41    |
| H14A | 6064.63  | 5595.39  | 4980     | 53    |
| H14B | 7073.82  | 5372.52  | 4393.15  | 53    |
| H14C | 5577.08  | 5598.51  | 3630.36  | 53    |
| H15A | 7774.57  | 8553.87  | 5433.11  | 67    |
| H15B | 8422     | 7203.12  | 5577.33  | 67    |
| H15C | 7371.08  | 7488.73  | 6106.89  | 67    |

## 9. Reference

1. (a) J. Giwon, H. K. Min and K. Jinho, *Org. Chem. Front.*, 2020, **7**, 834; (b) J.-Y. Zhang, M. Liu, M. Huang, H. Liu, Y.-K. Yan, Z.-Y. Wang and X.-M. Zhang. *Org. Chem. Front.*, 2020, **7**, 3160.
2. S. Ghosh, S. Chaudhuri and A. Bisai. *Chem. Eur. J.*, 2015, **21**, 17479.
3. B. M. Loertscher, P. R. Young, P. R. Evans and S. L. Castle, *Org. Lett.*, 2013, **15**, 1930; (b) J. Barluenga, F. J. Fañanás, R. Sanz, C. Marcos and M. Trabada, *Org. Lett.*, 2002, **4**, 1587.

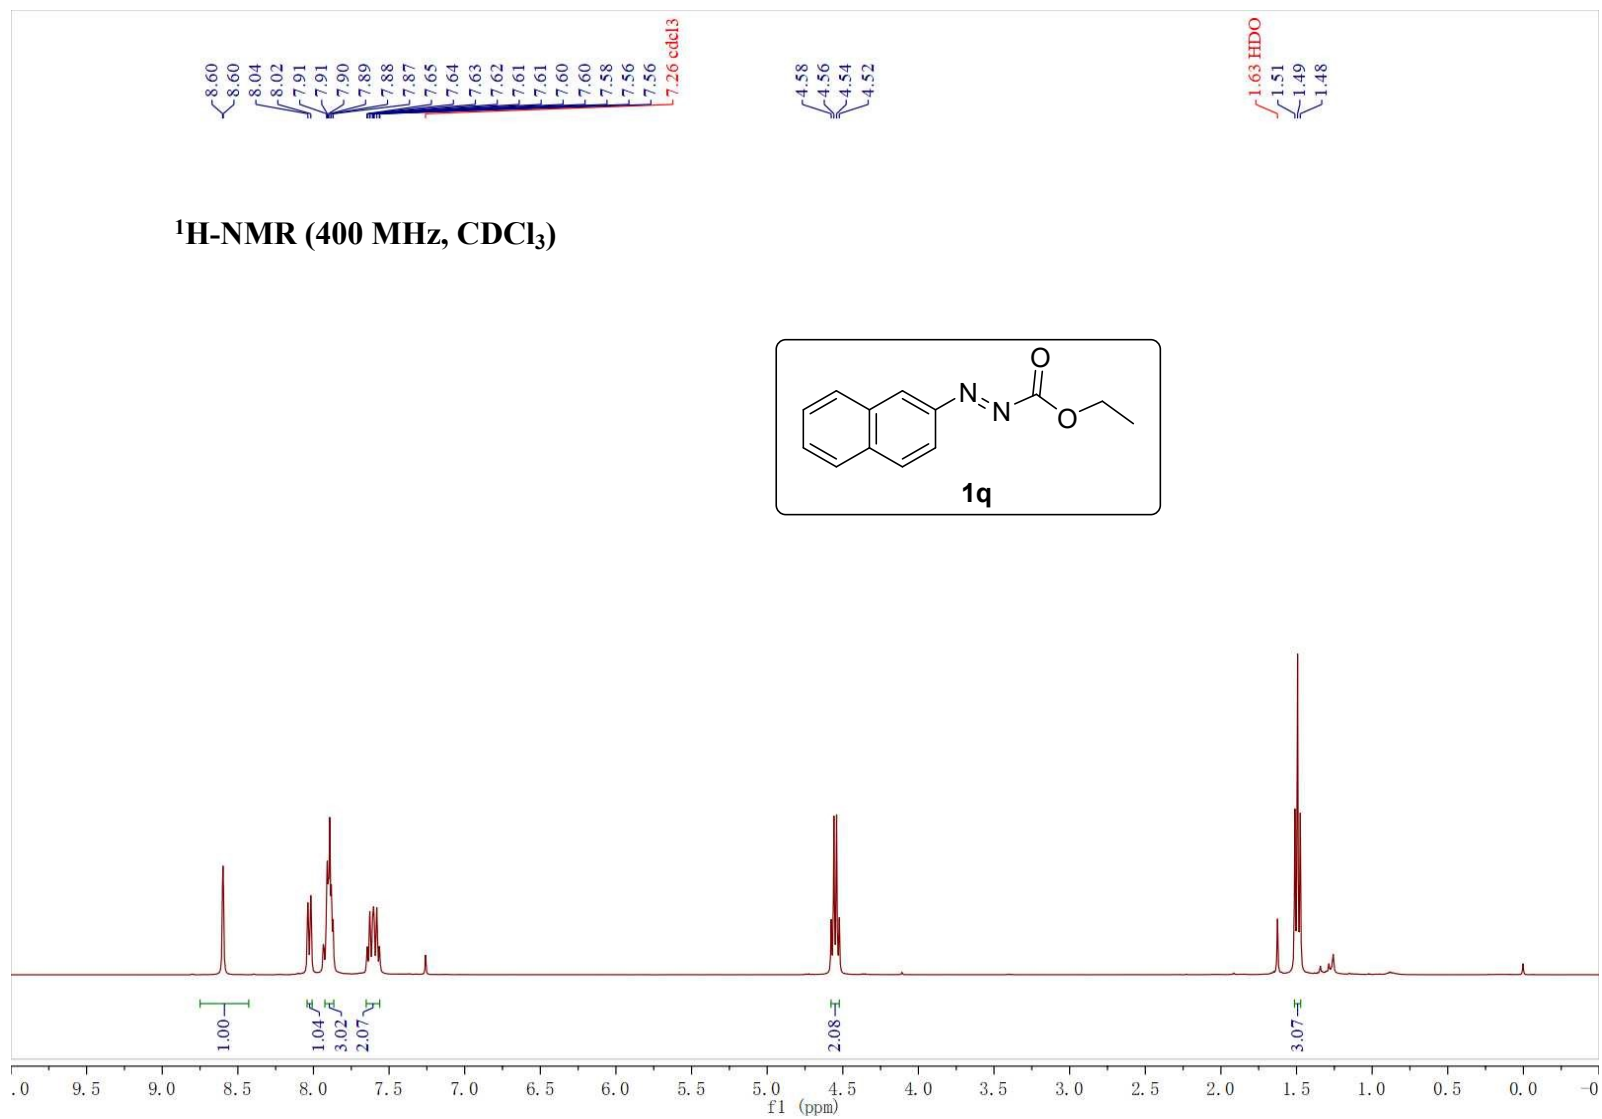

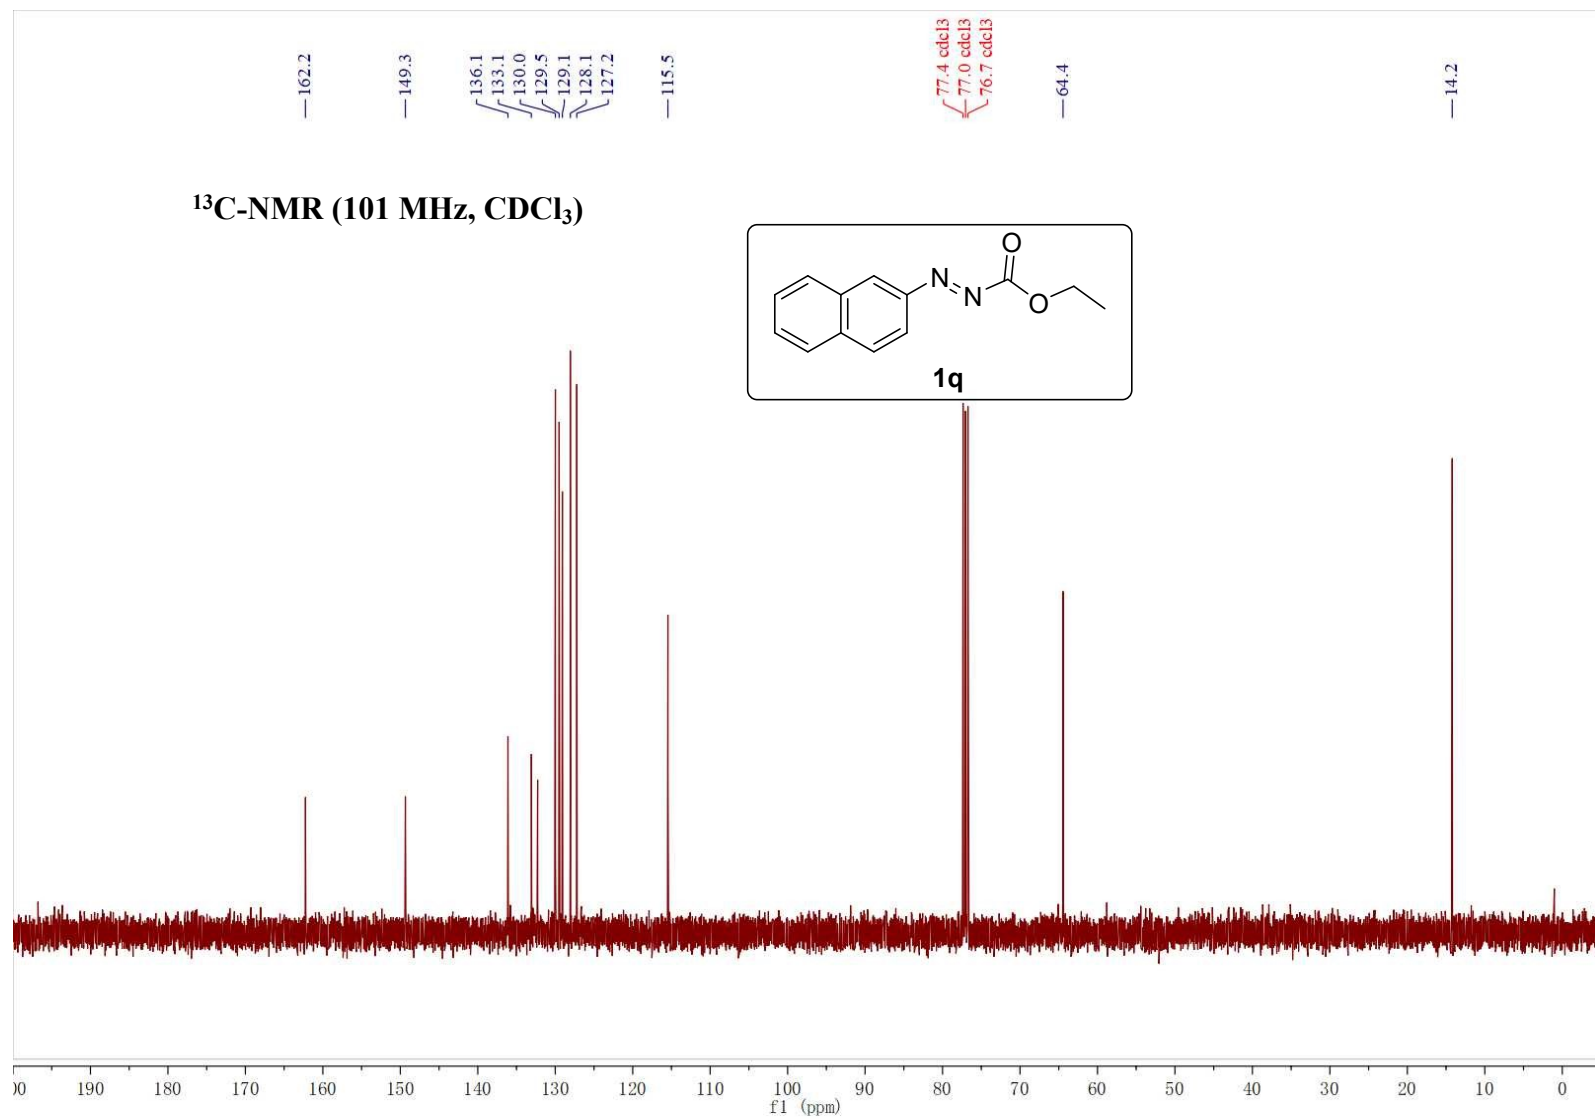

**<sup>1</sup>H-NMR (400 MHz, CDCl<sub>3</sub>)**

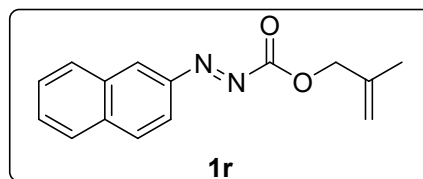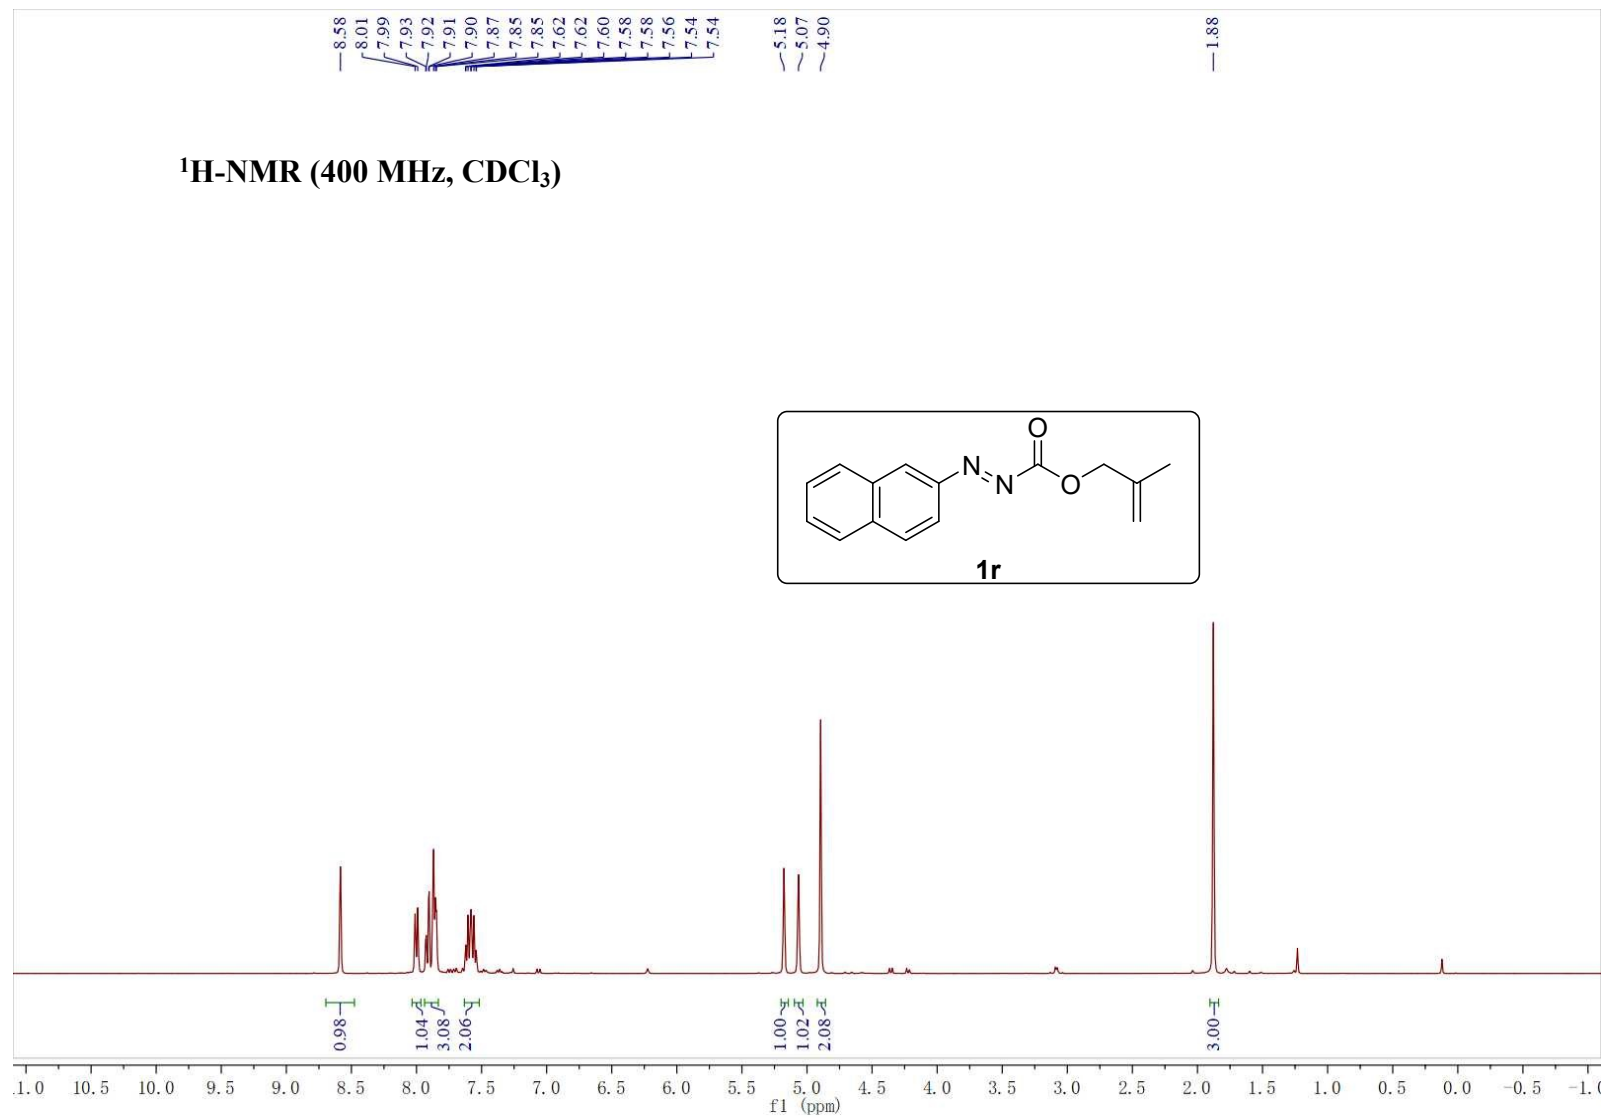

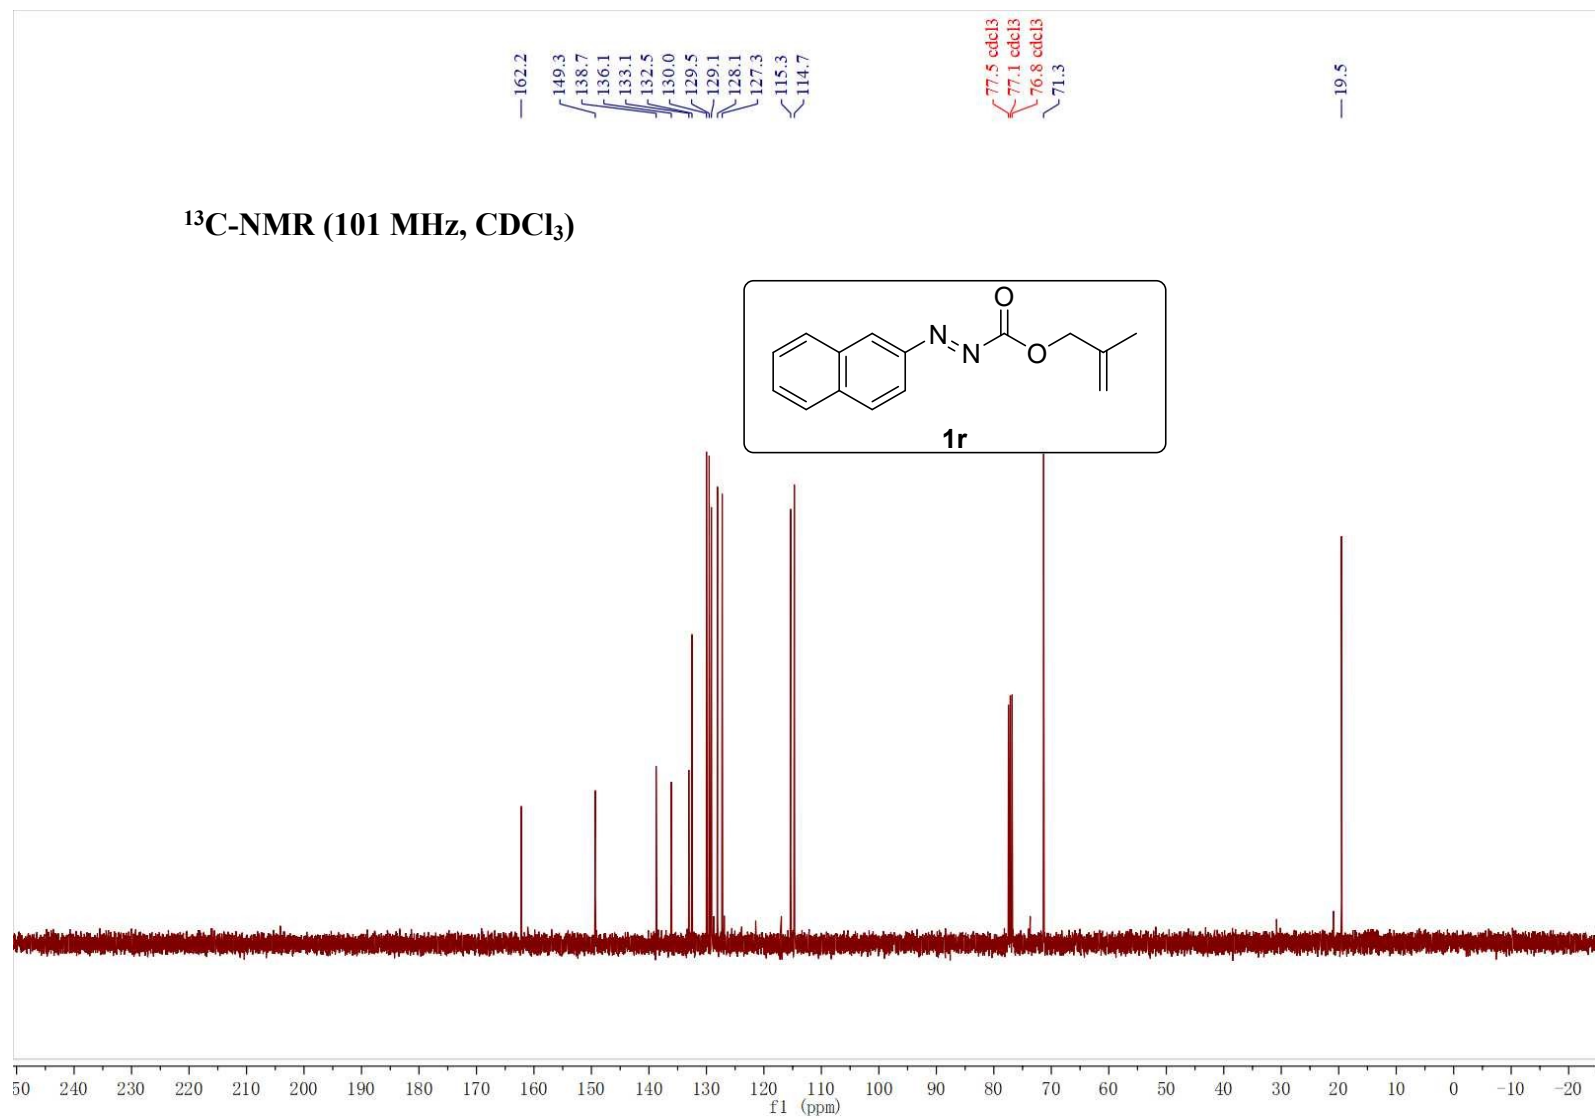

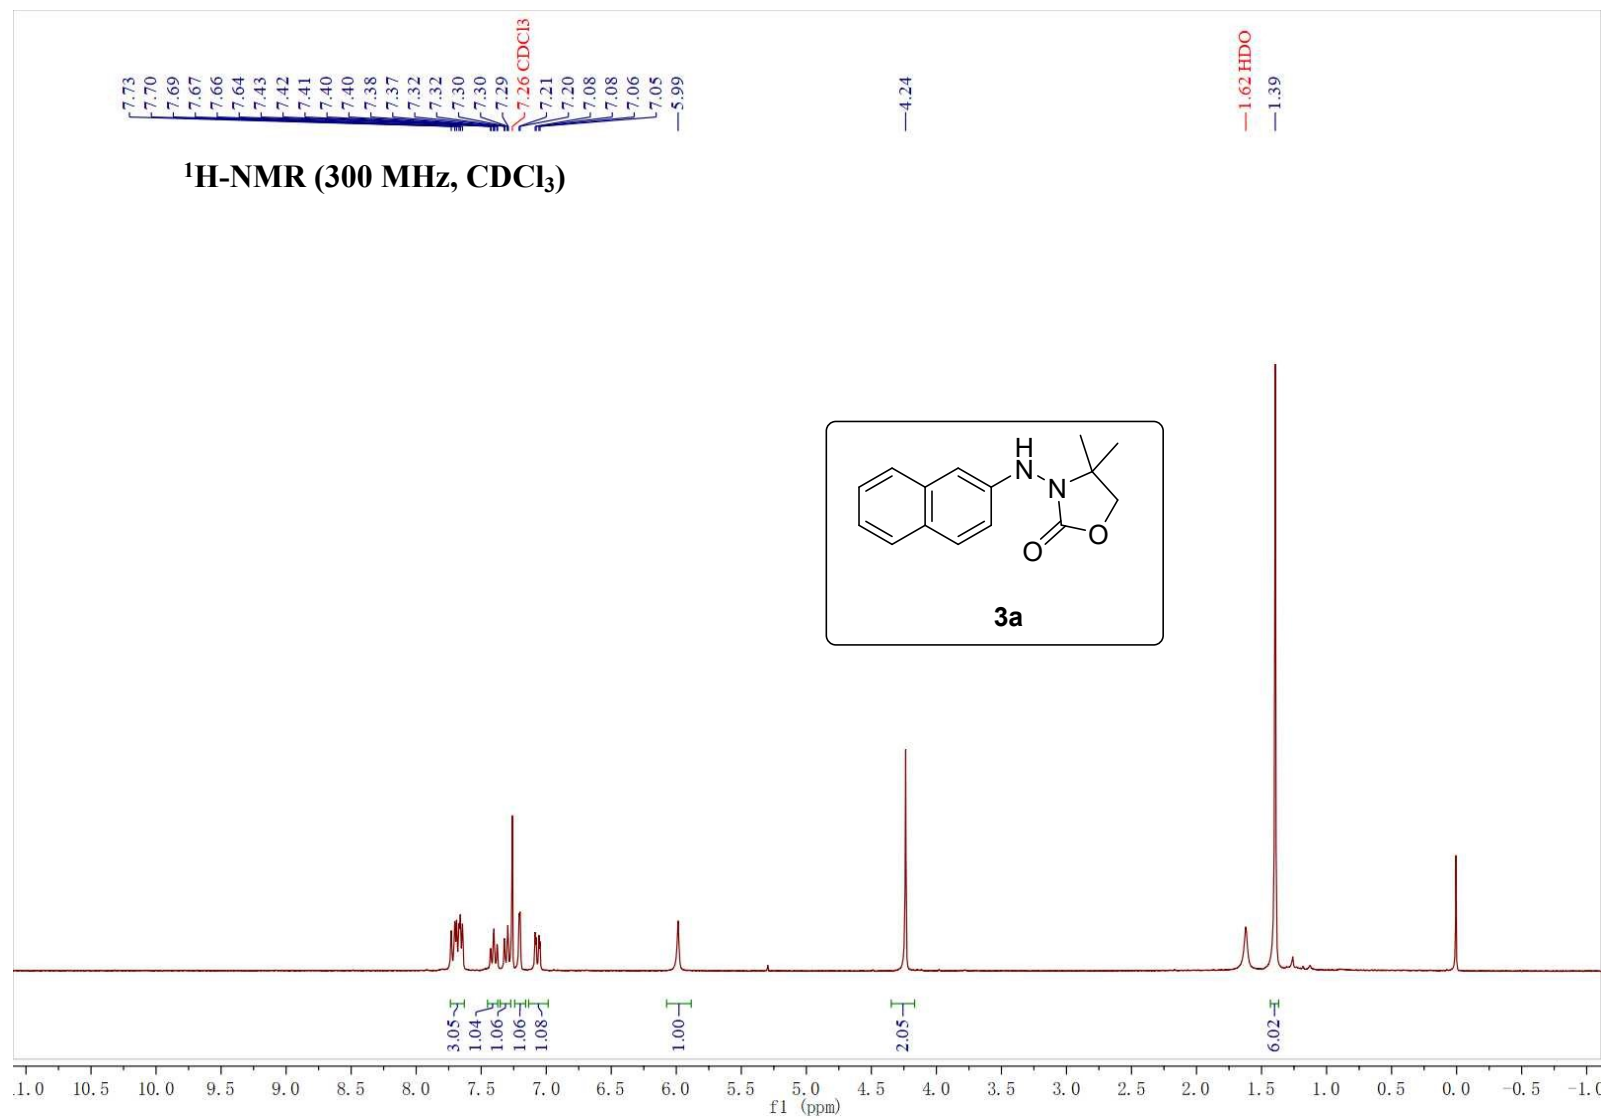



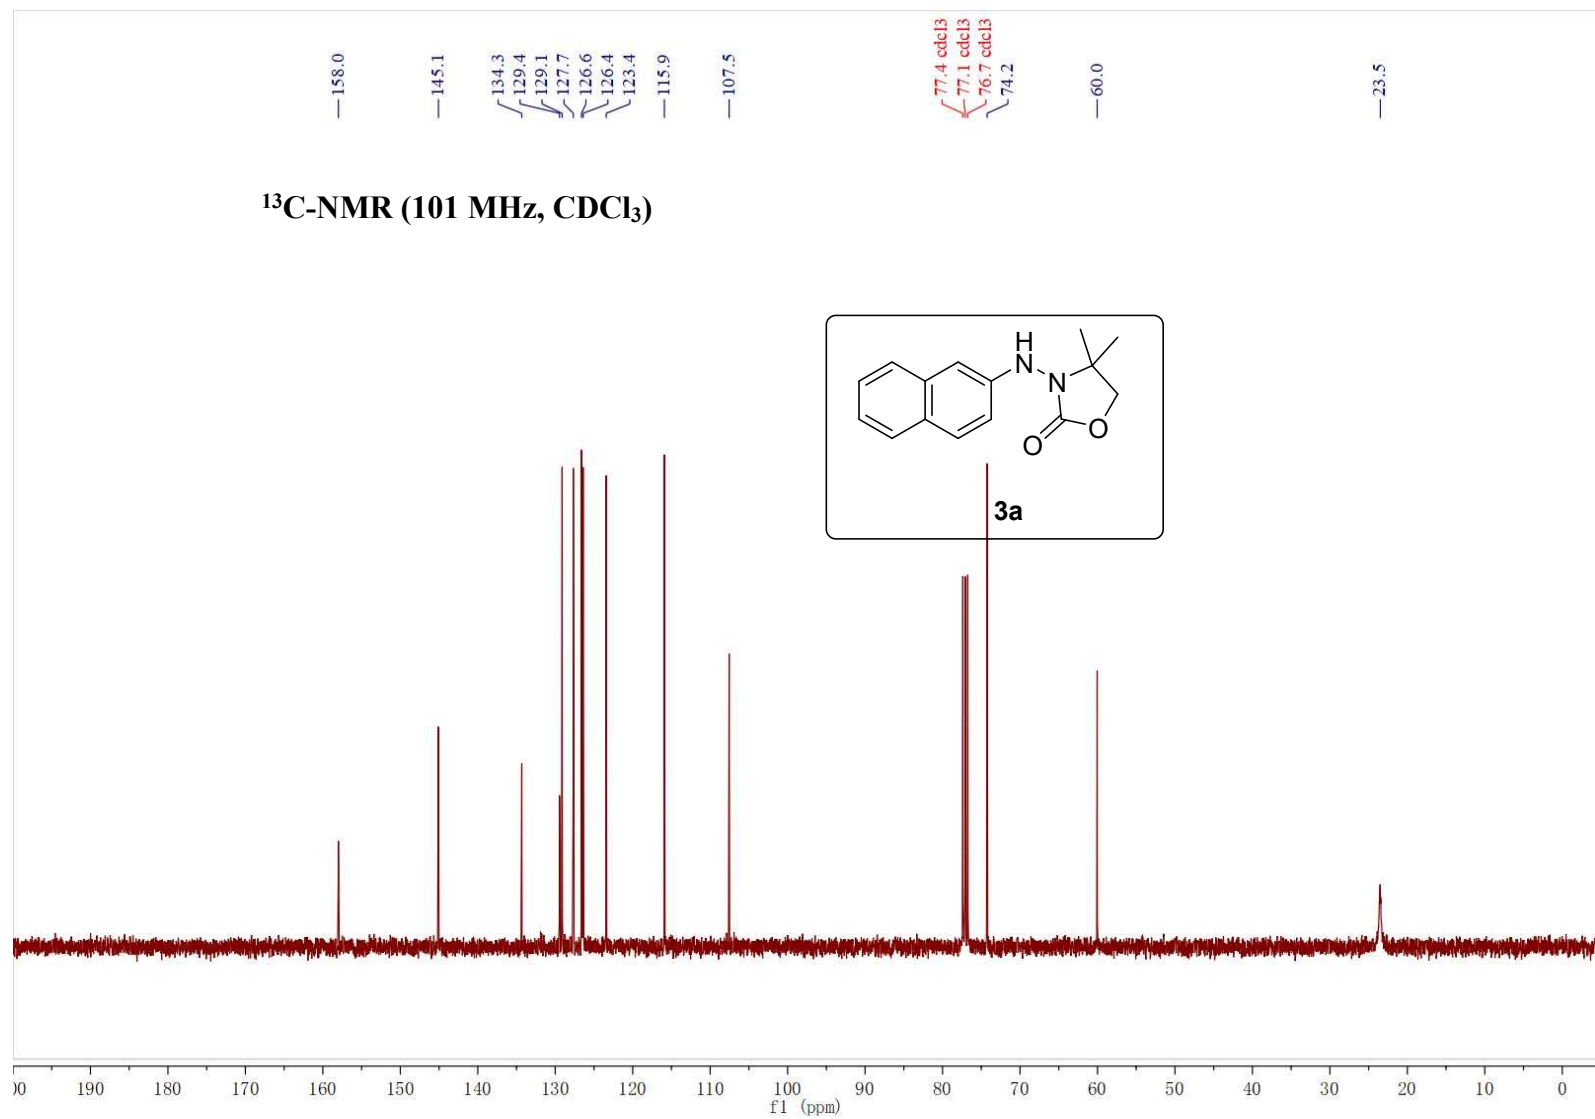

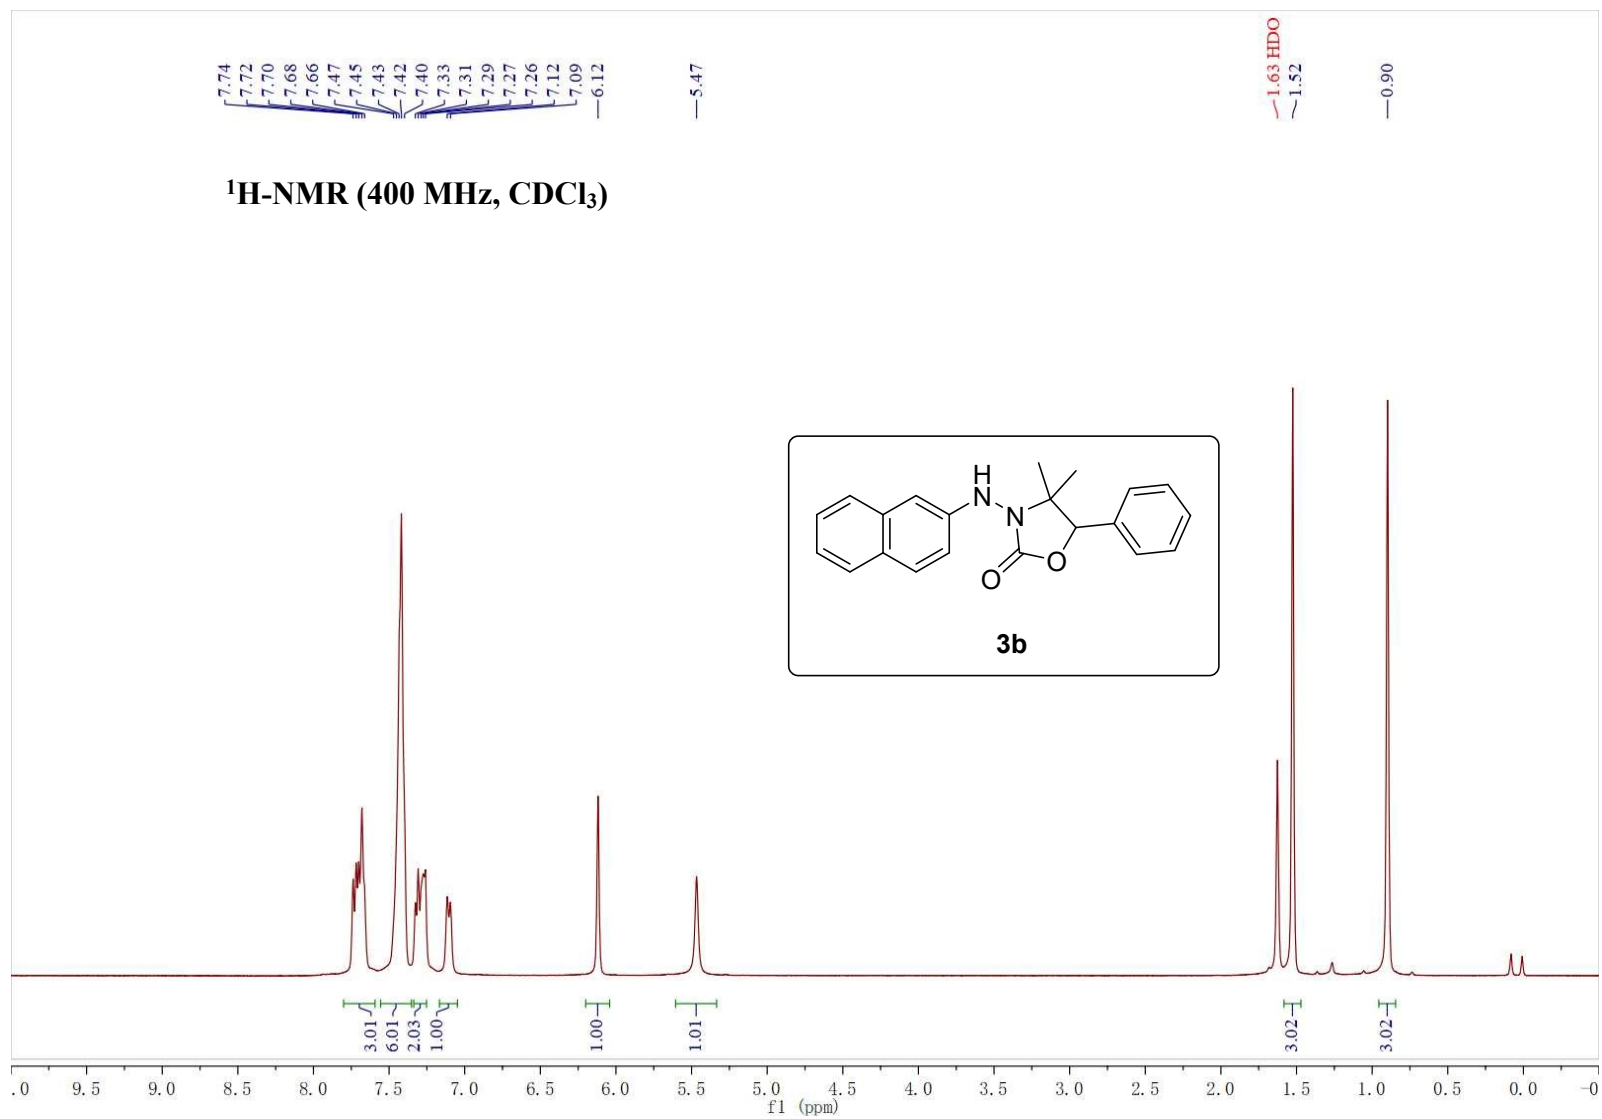

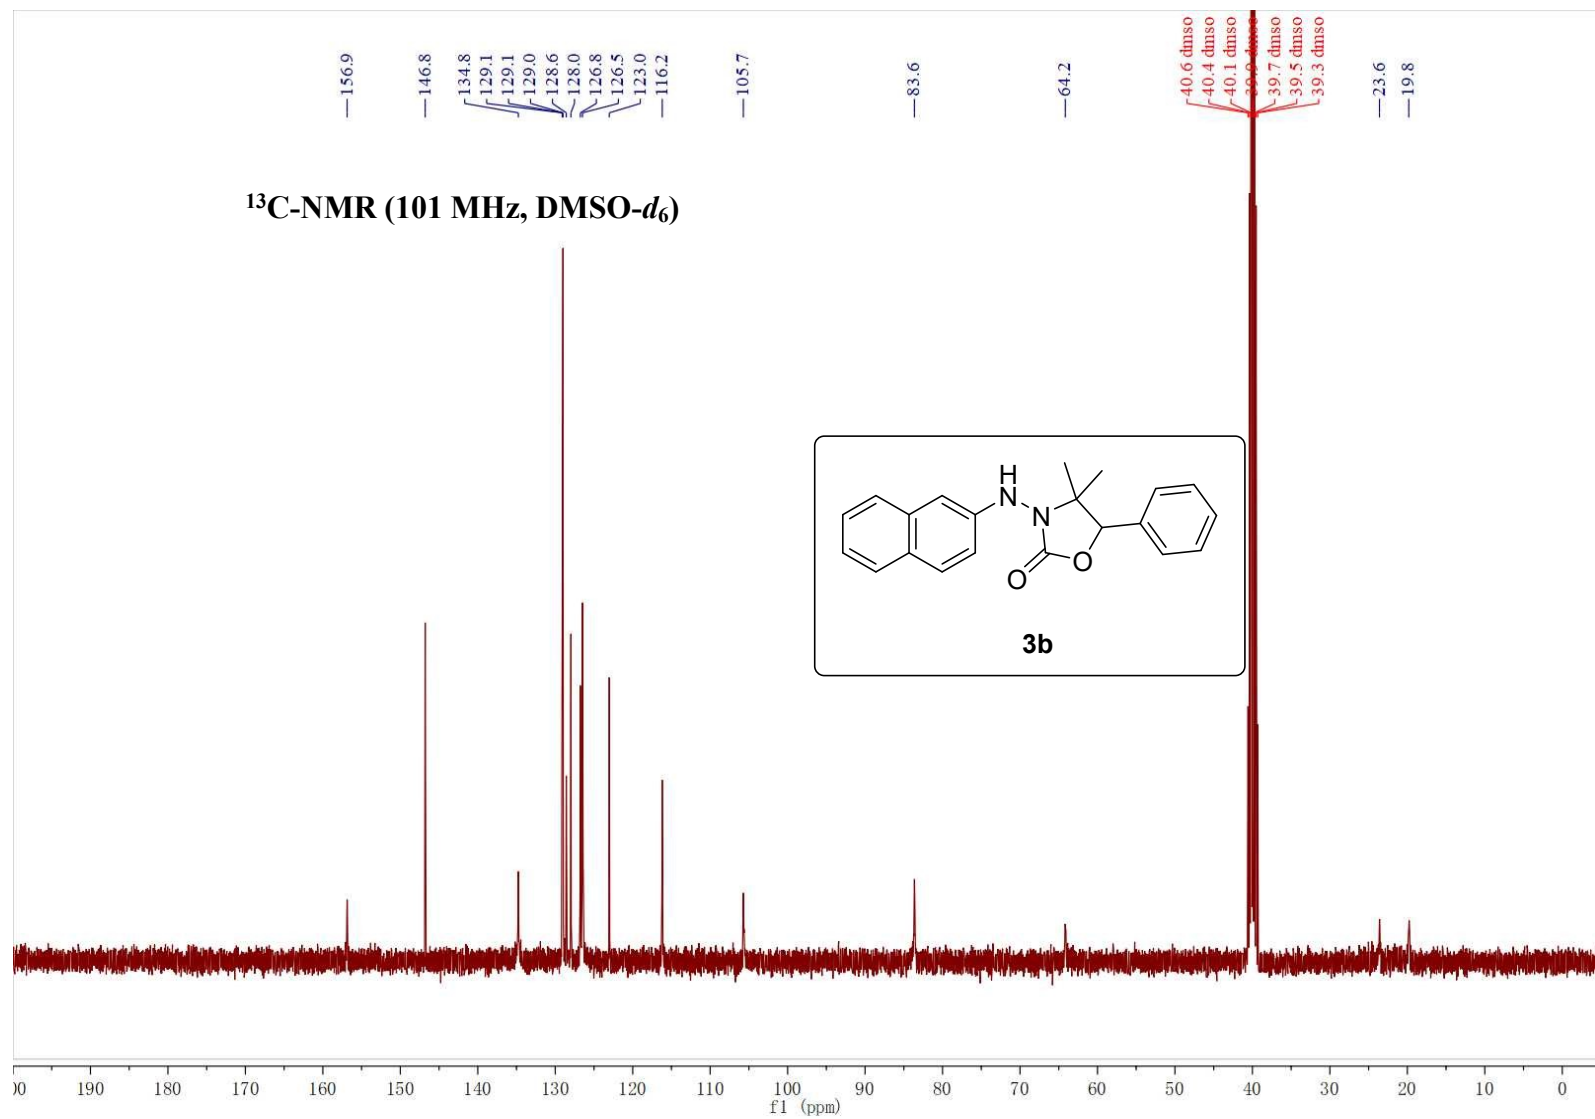

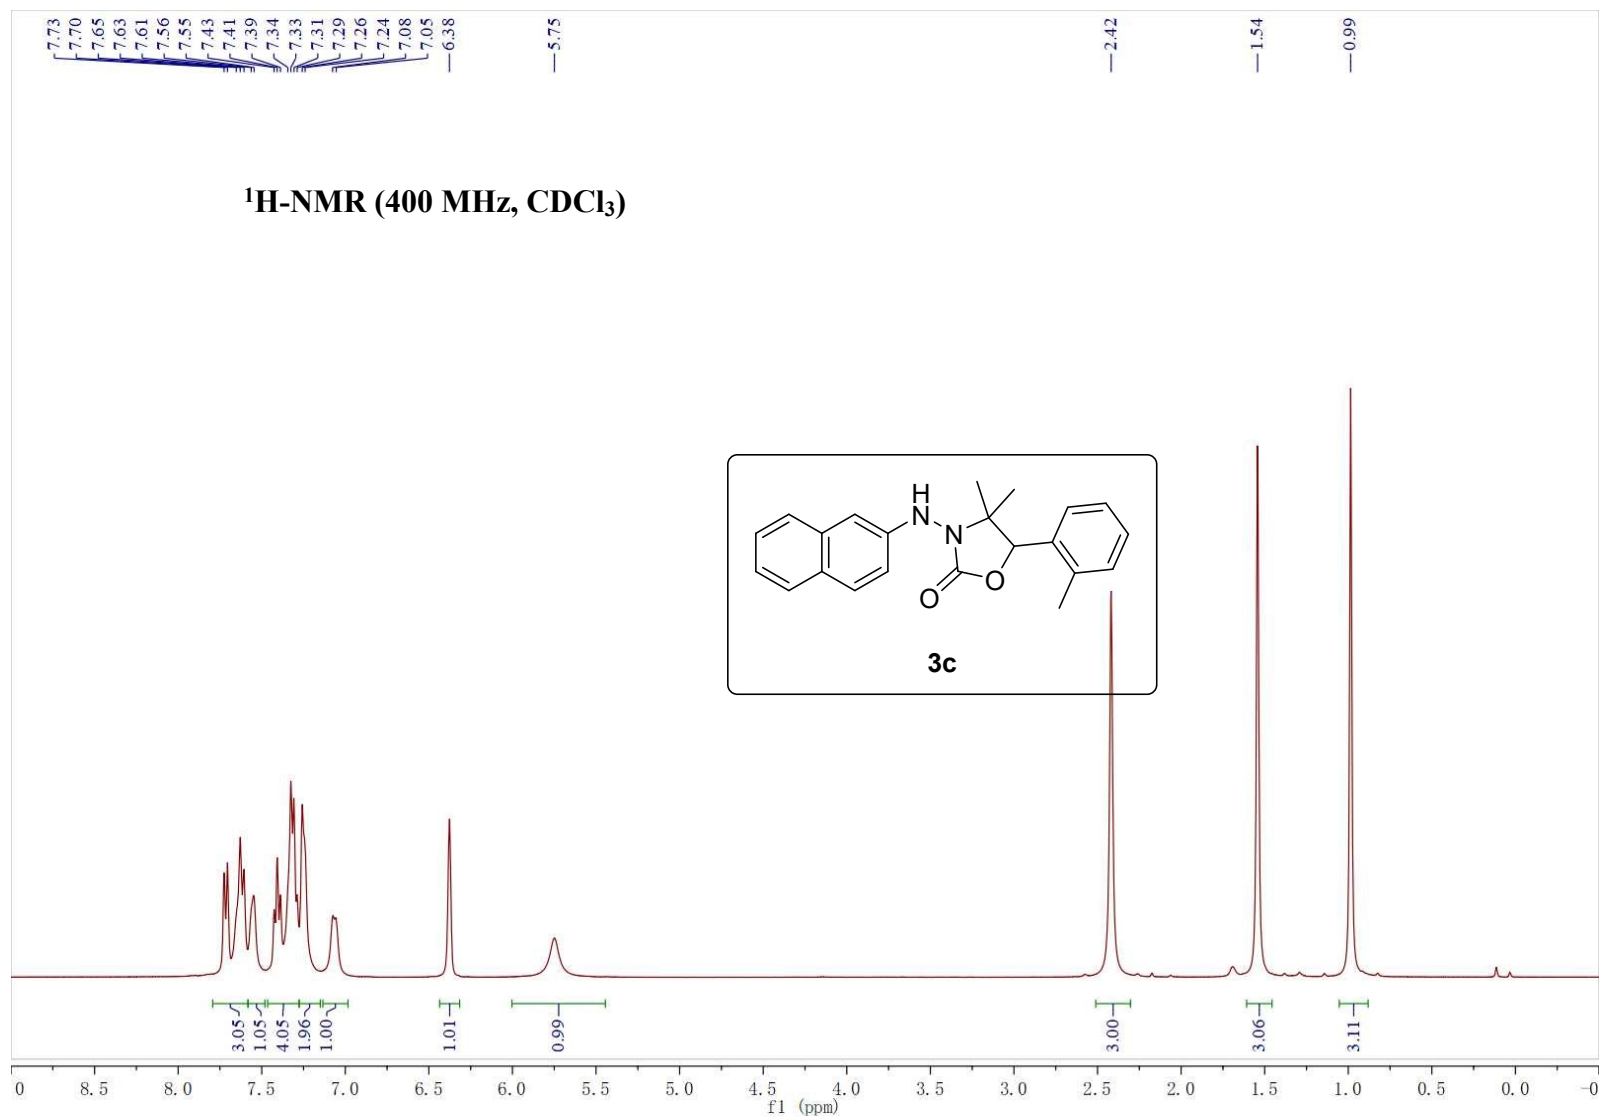

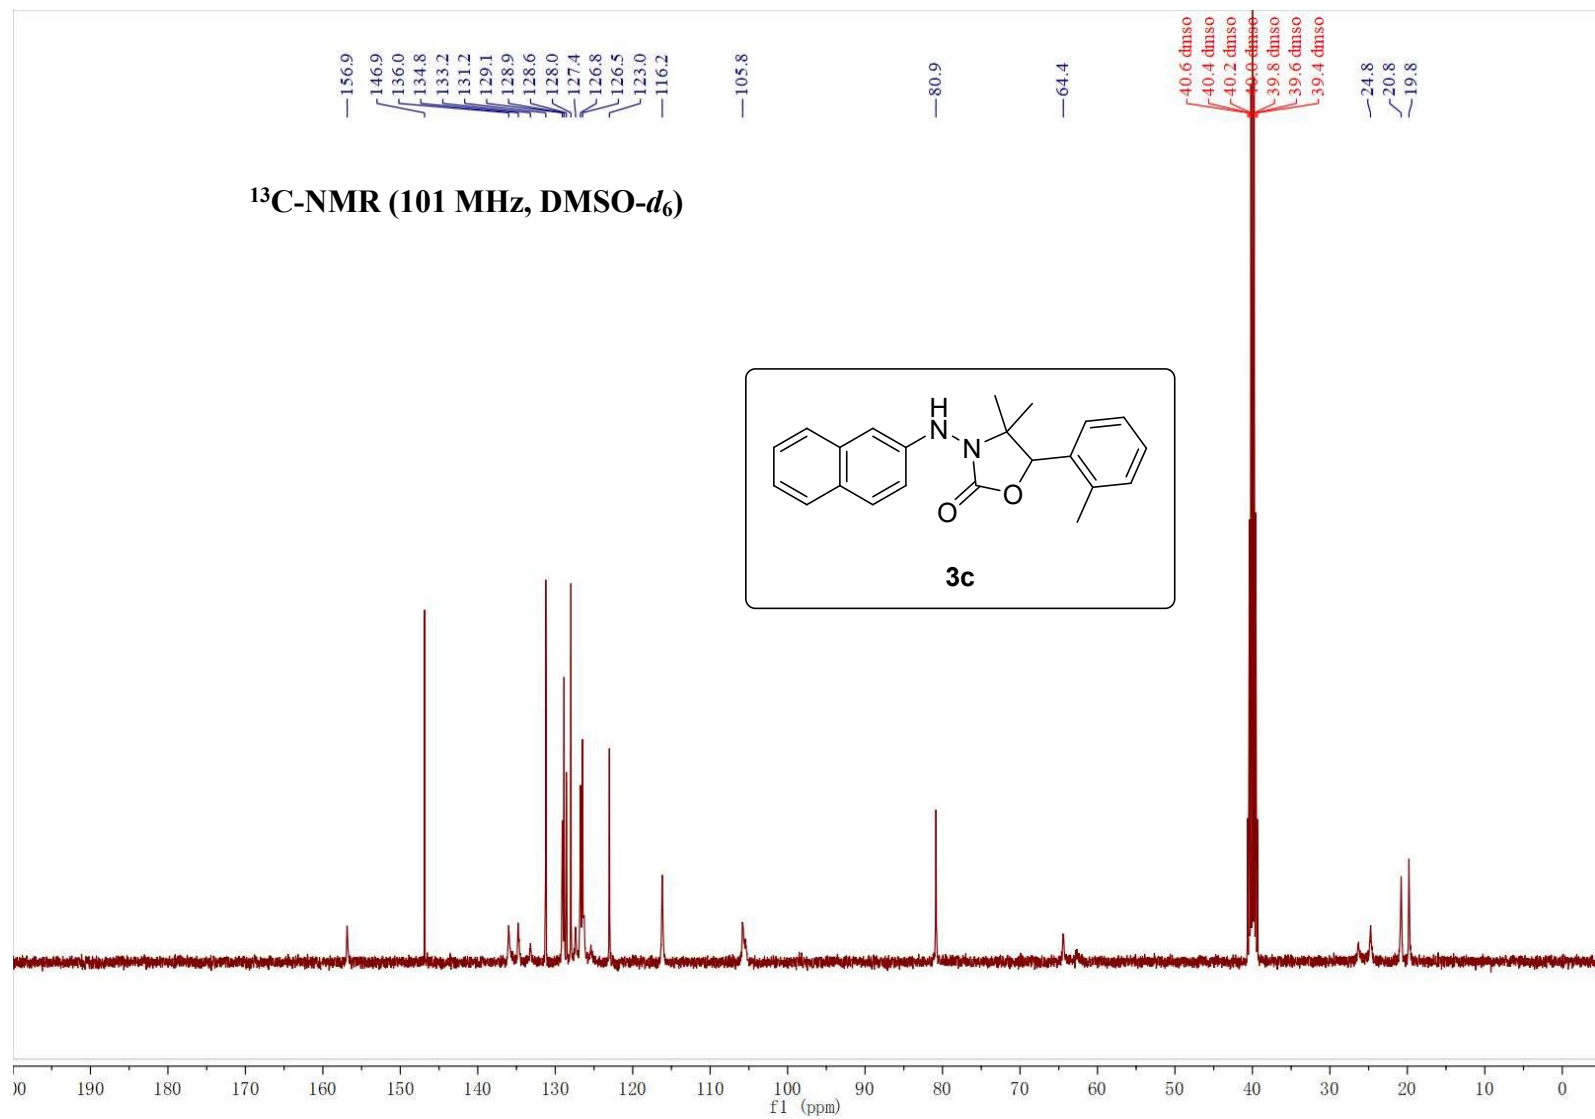

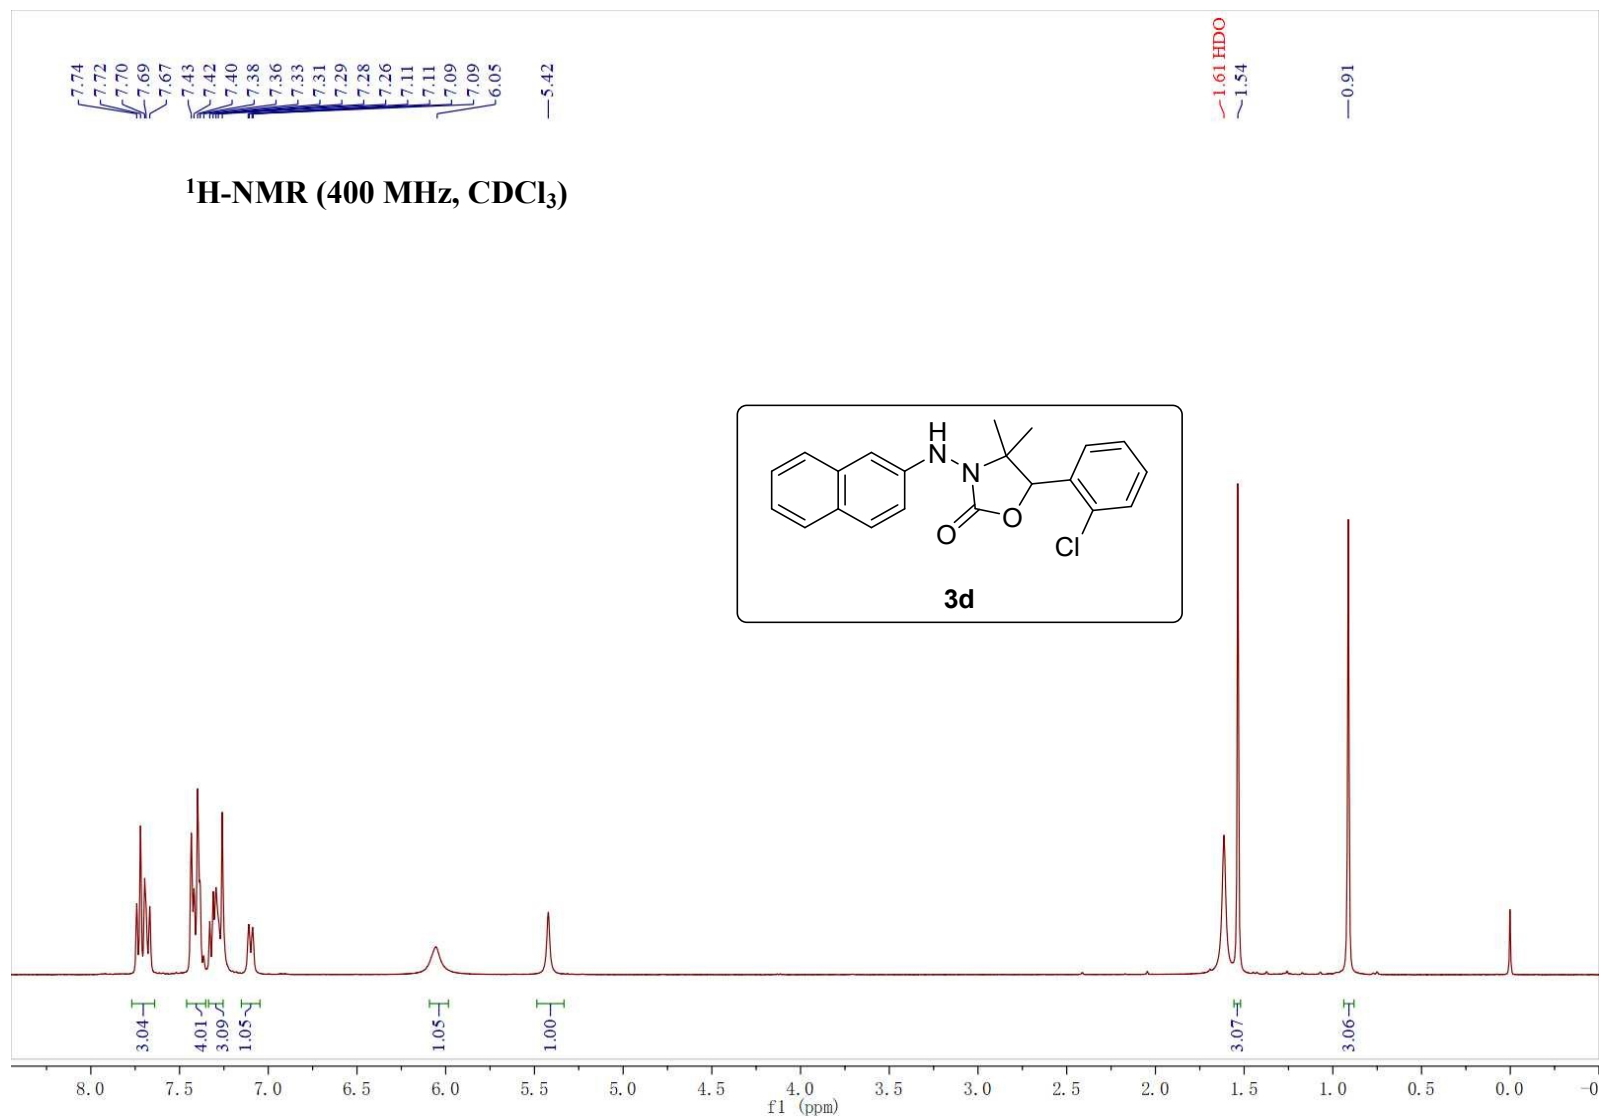

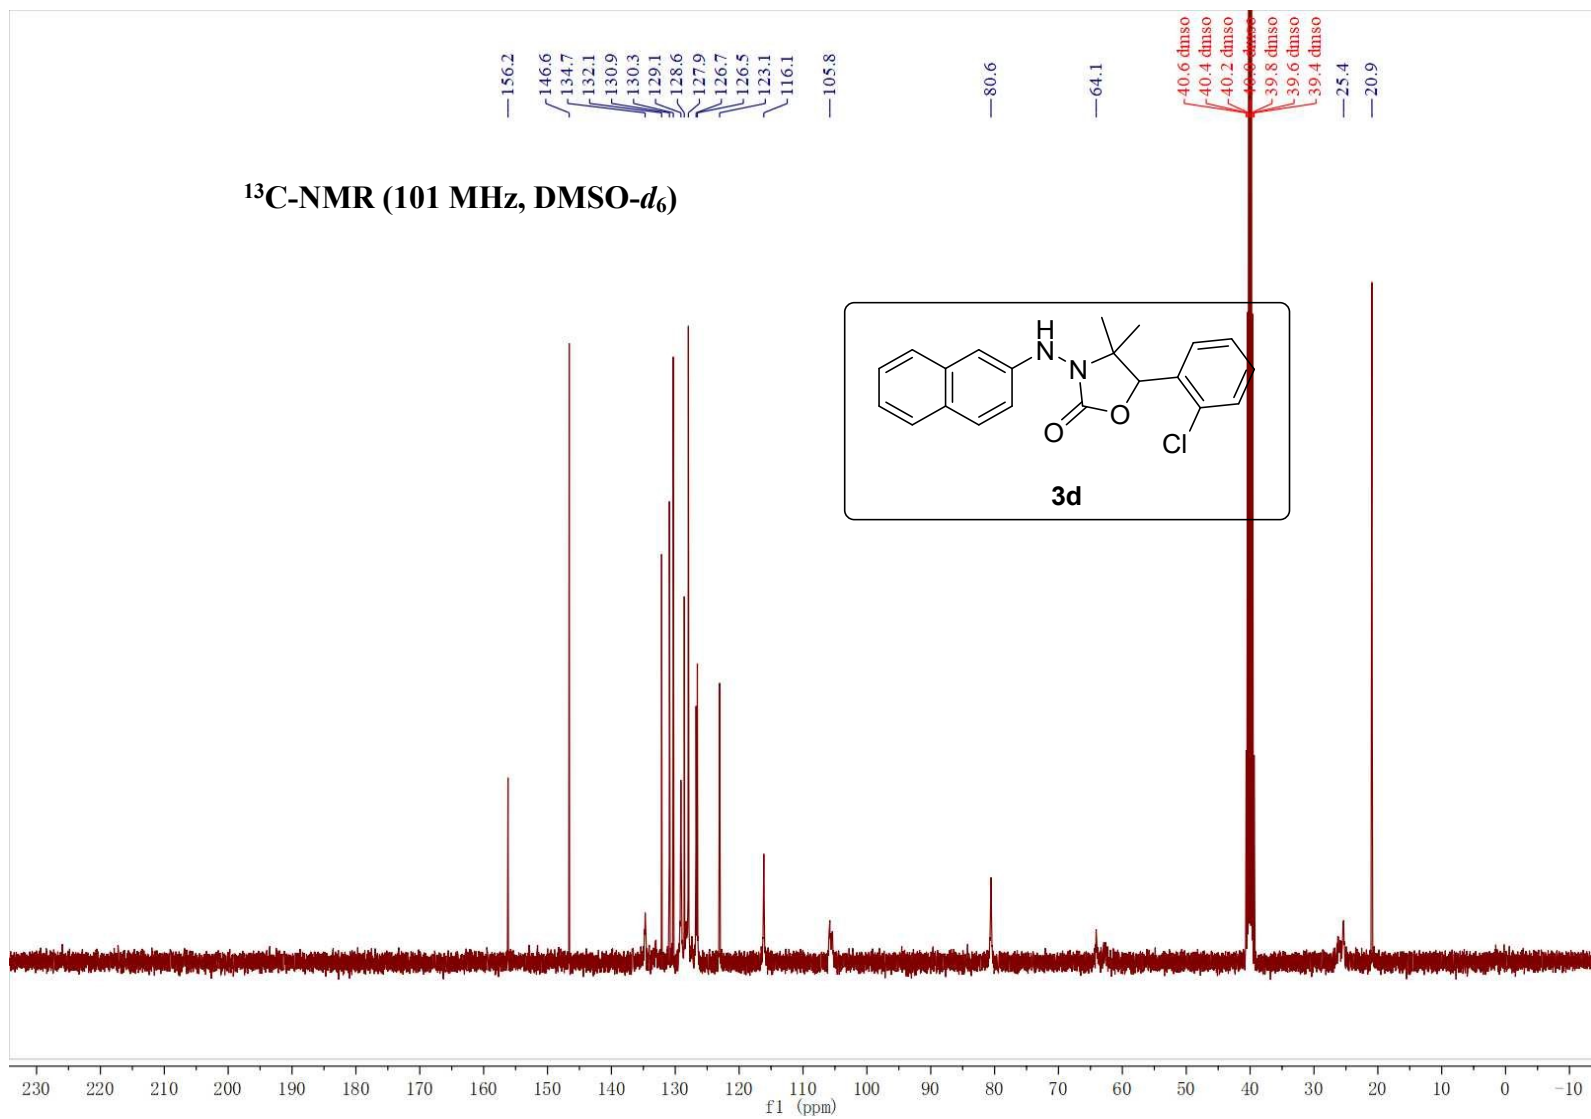

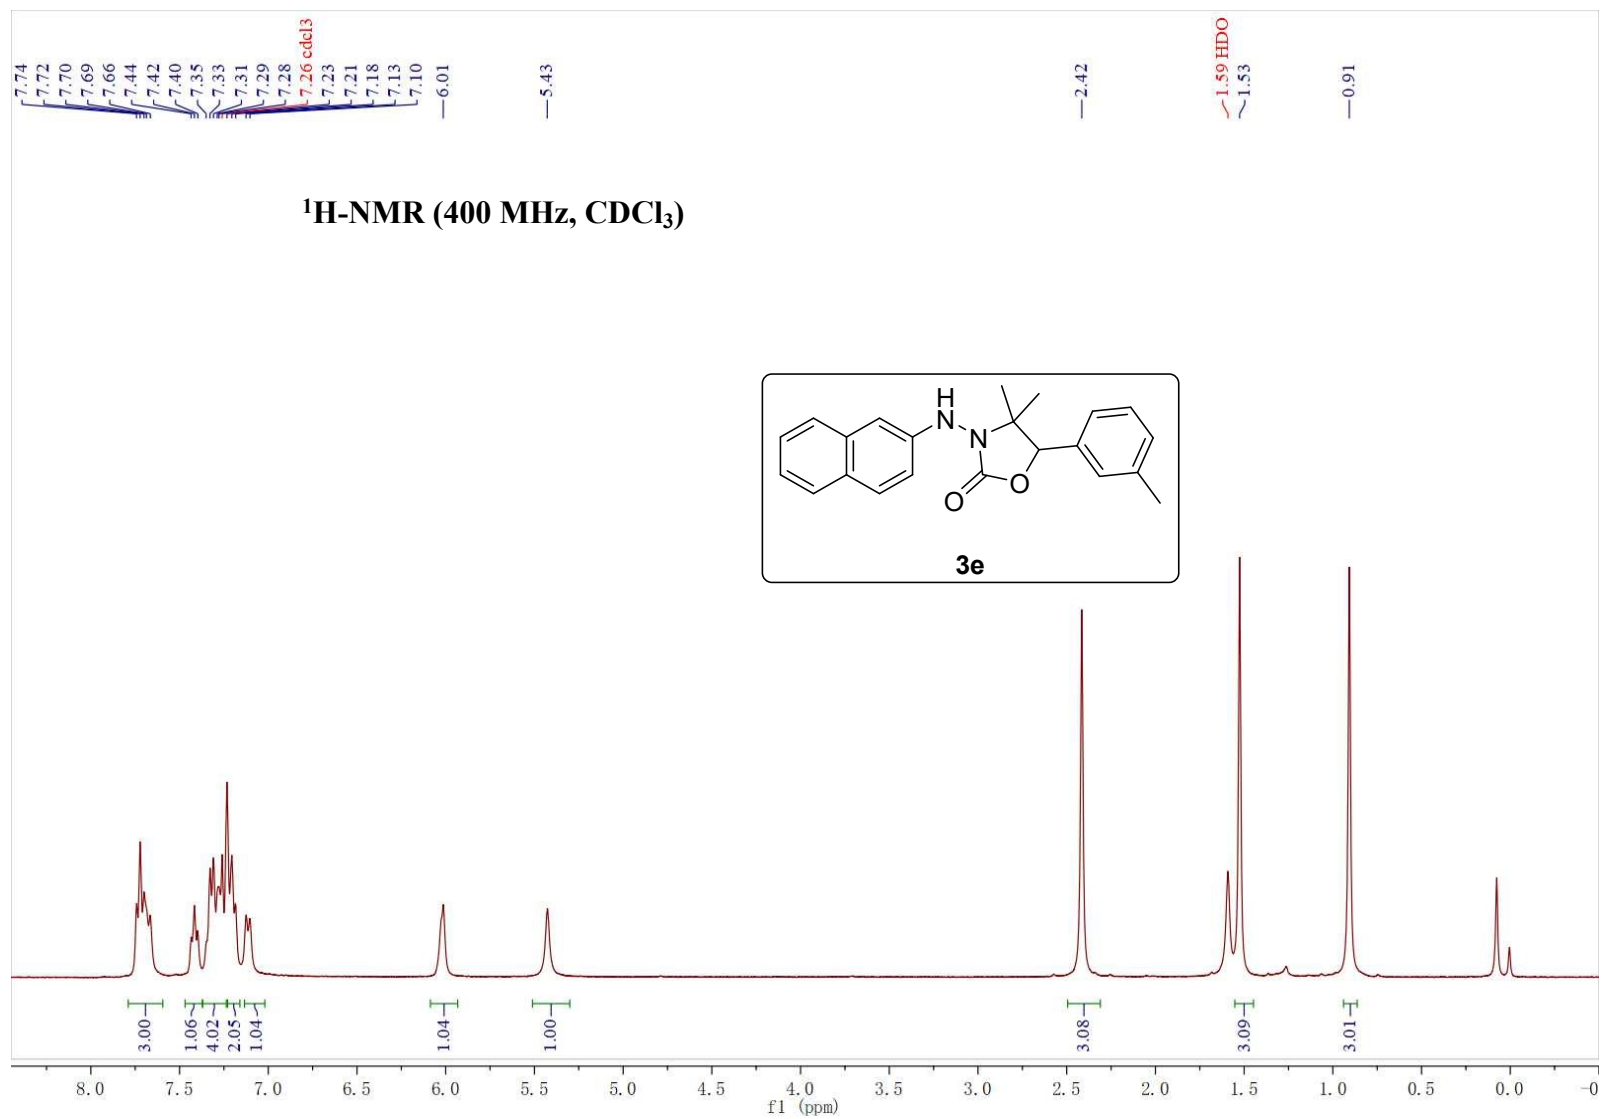



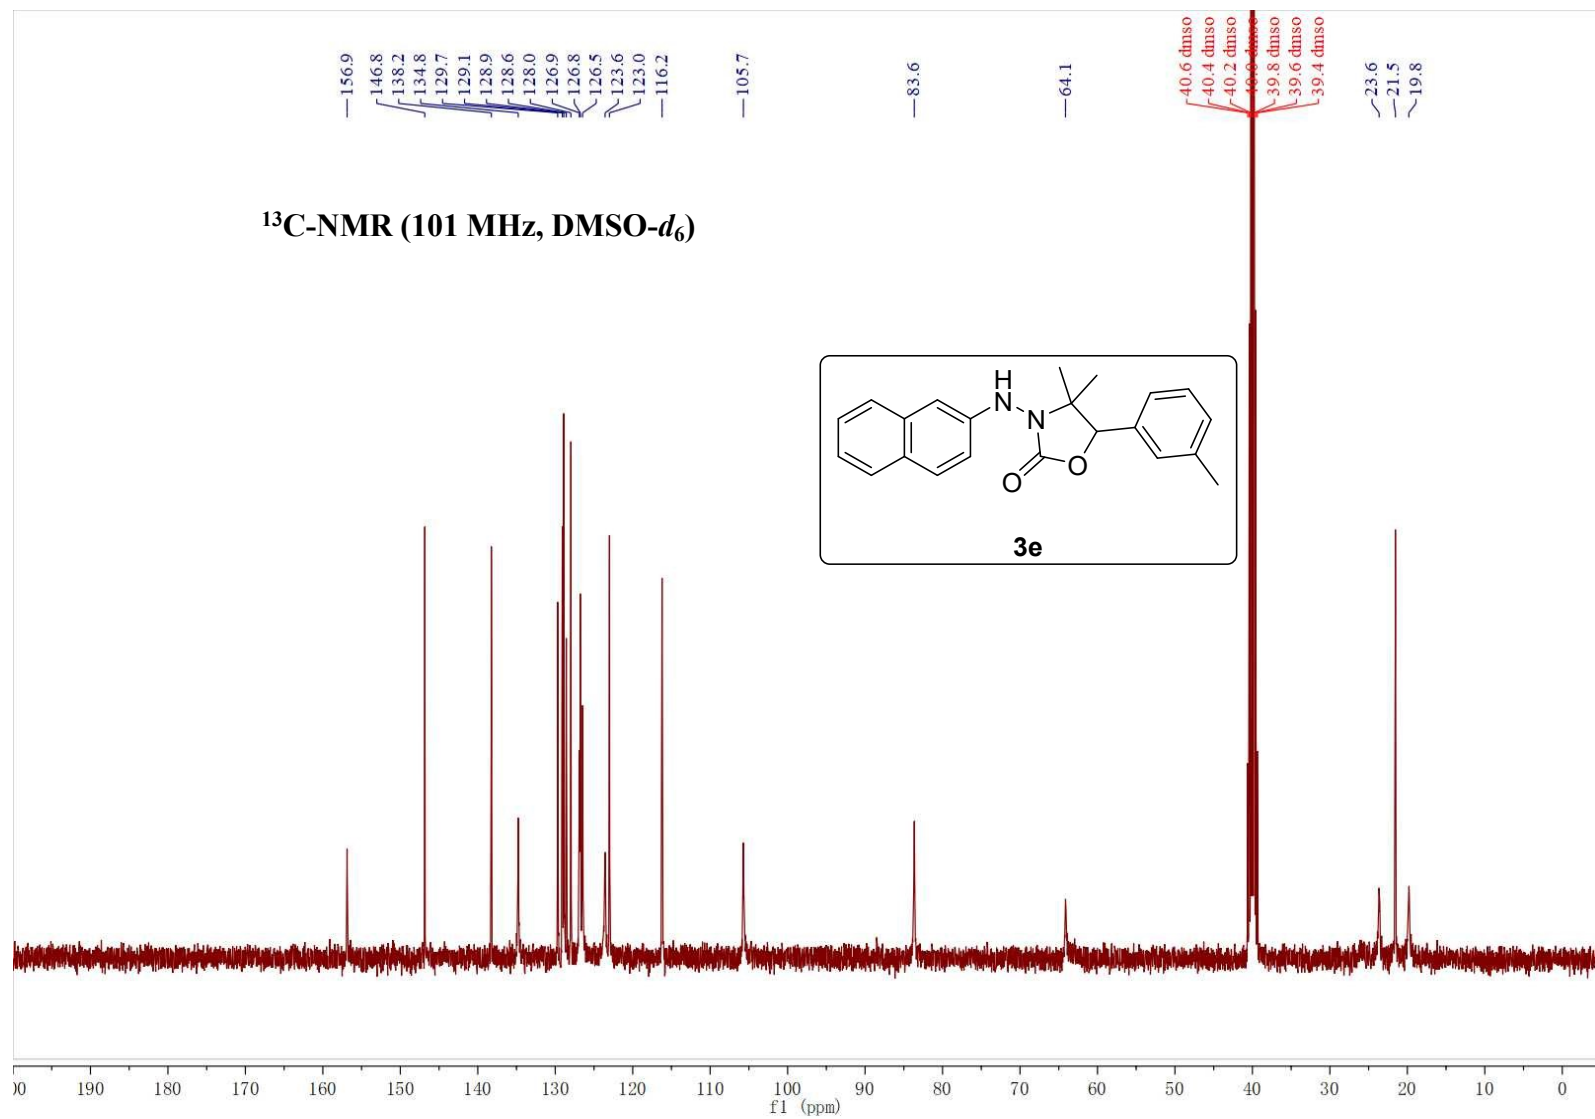

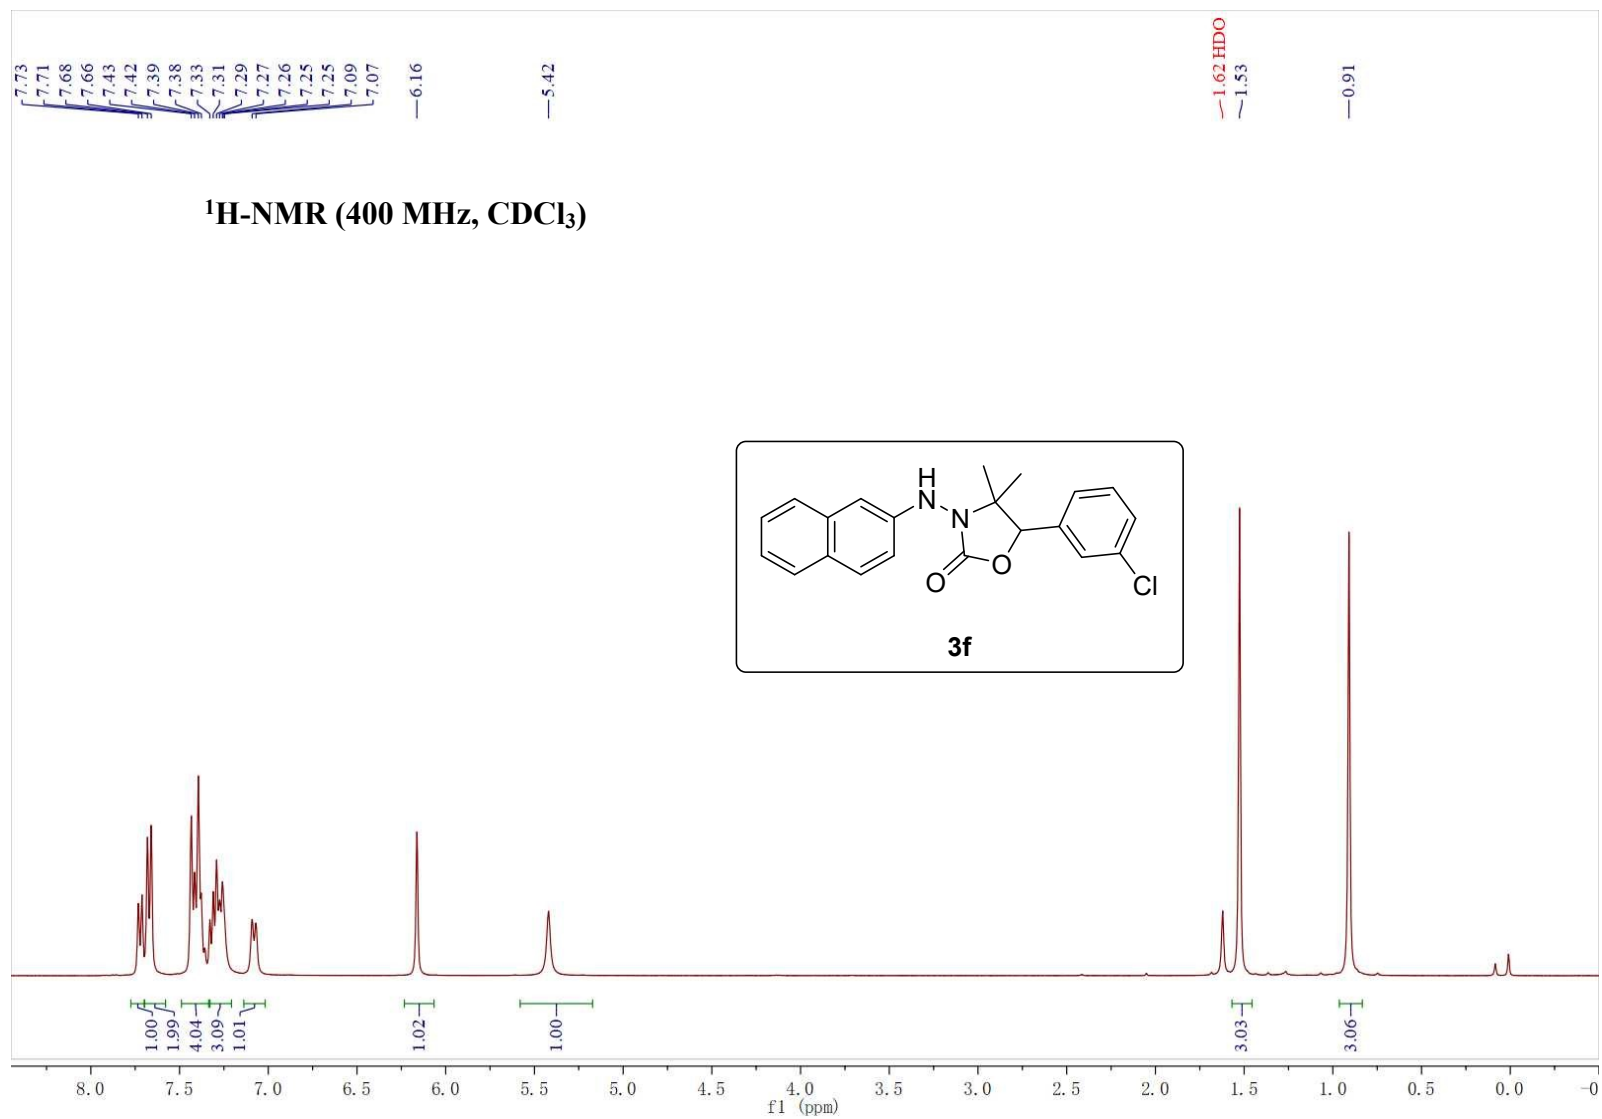

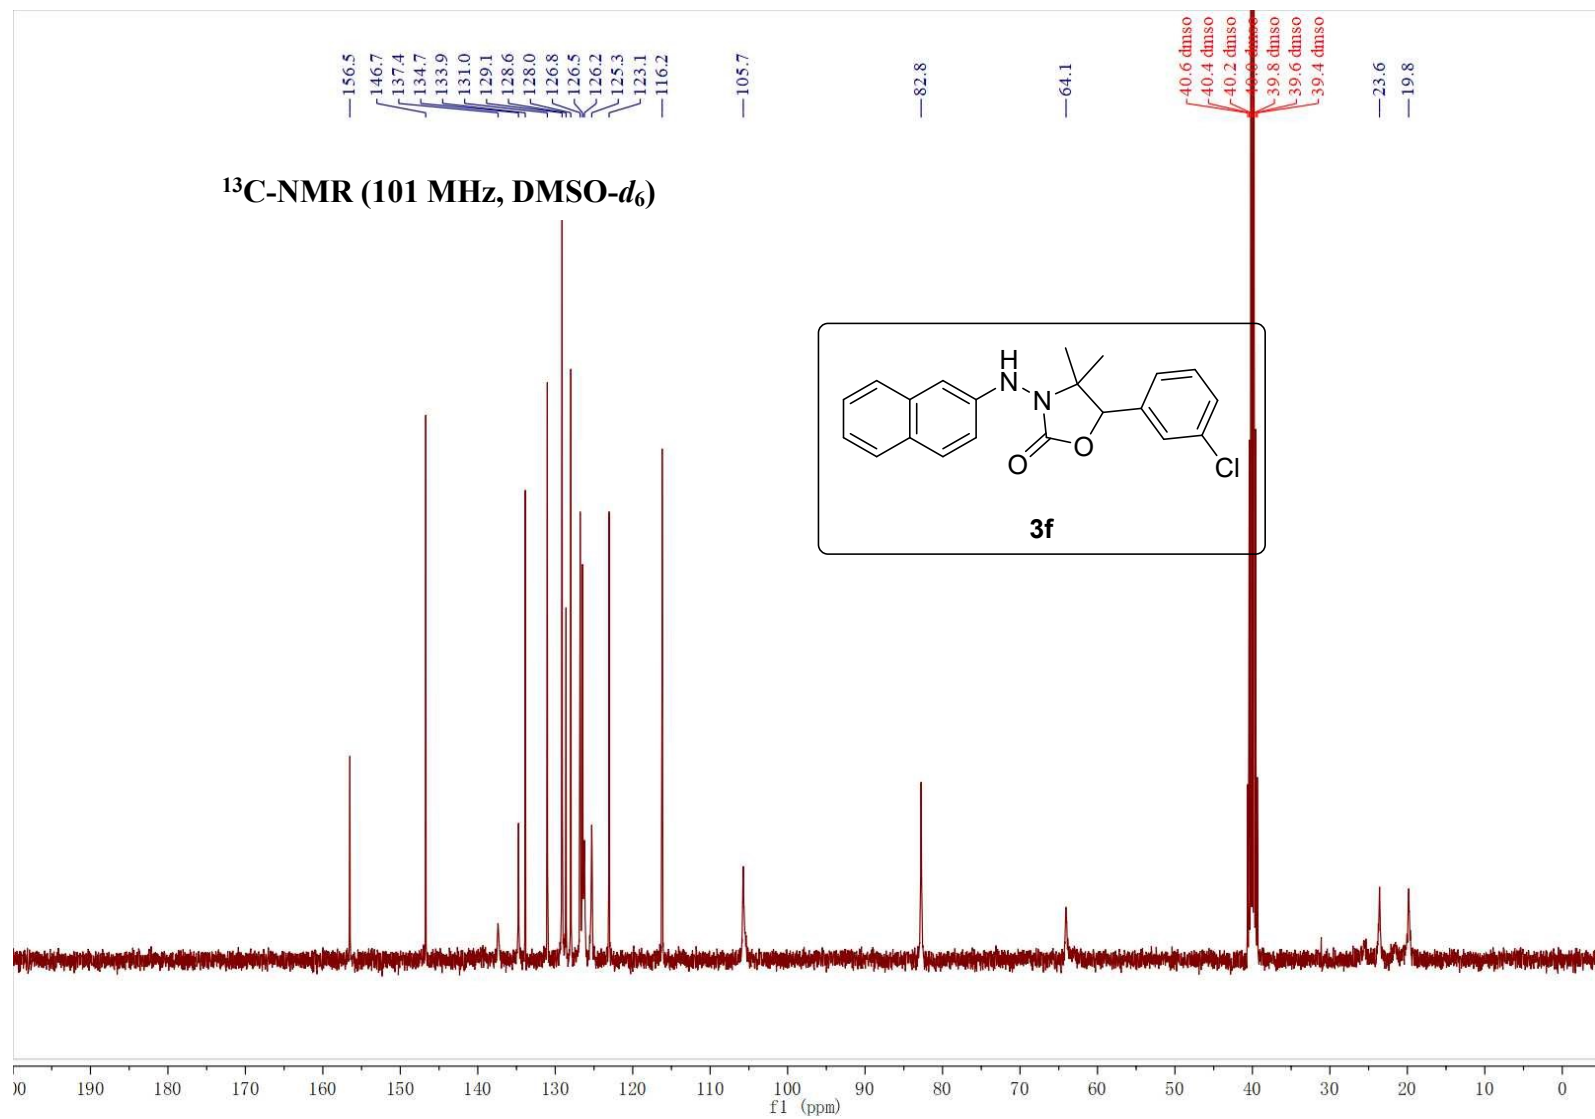

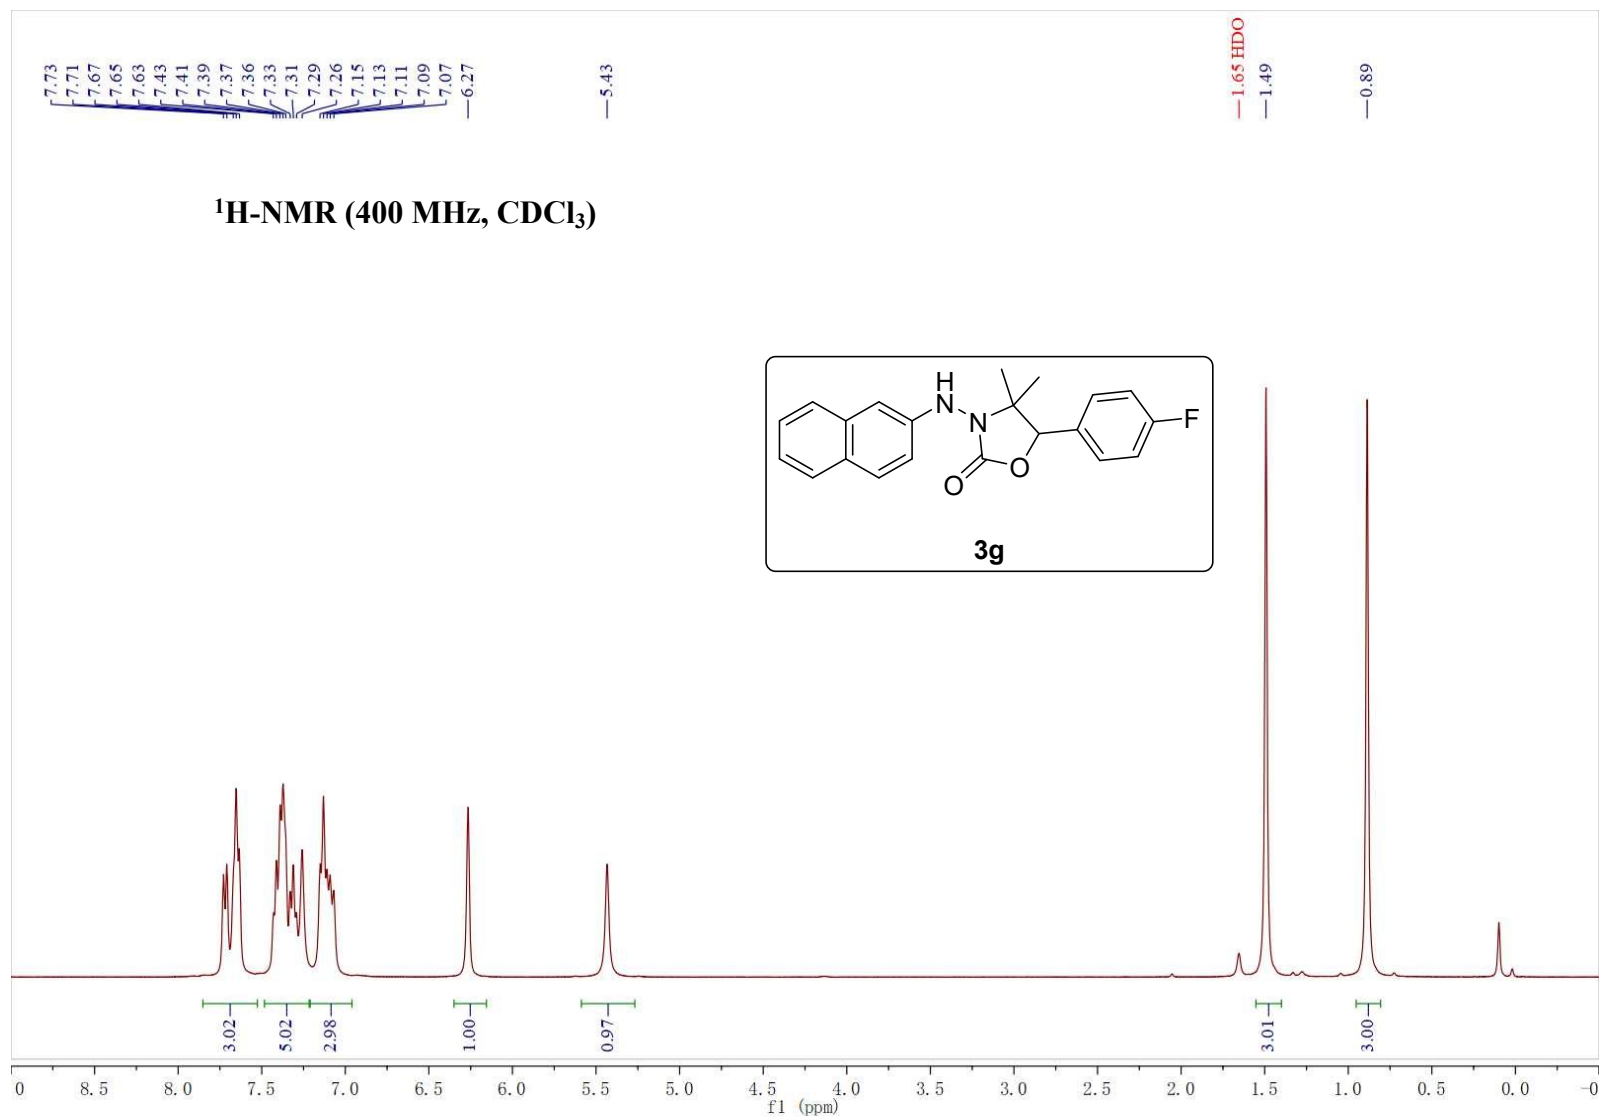

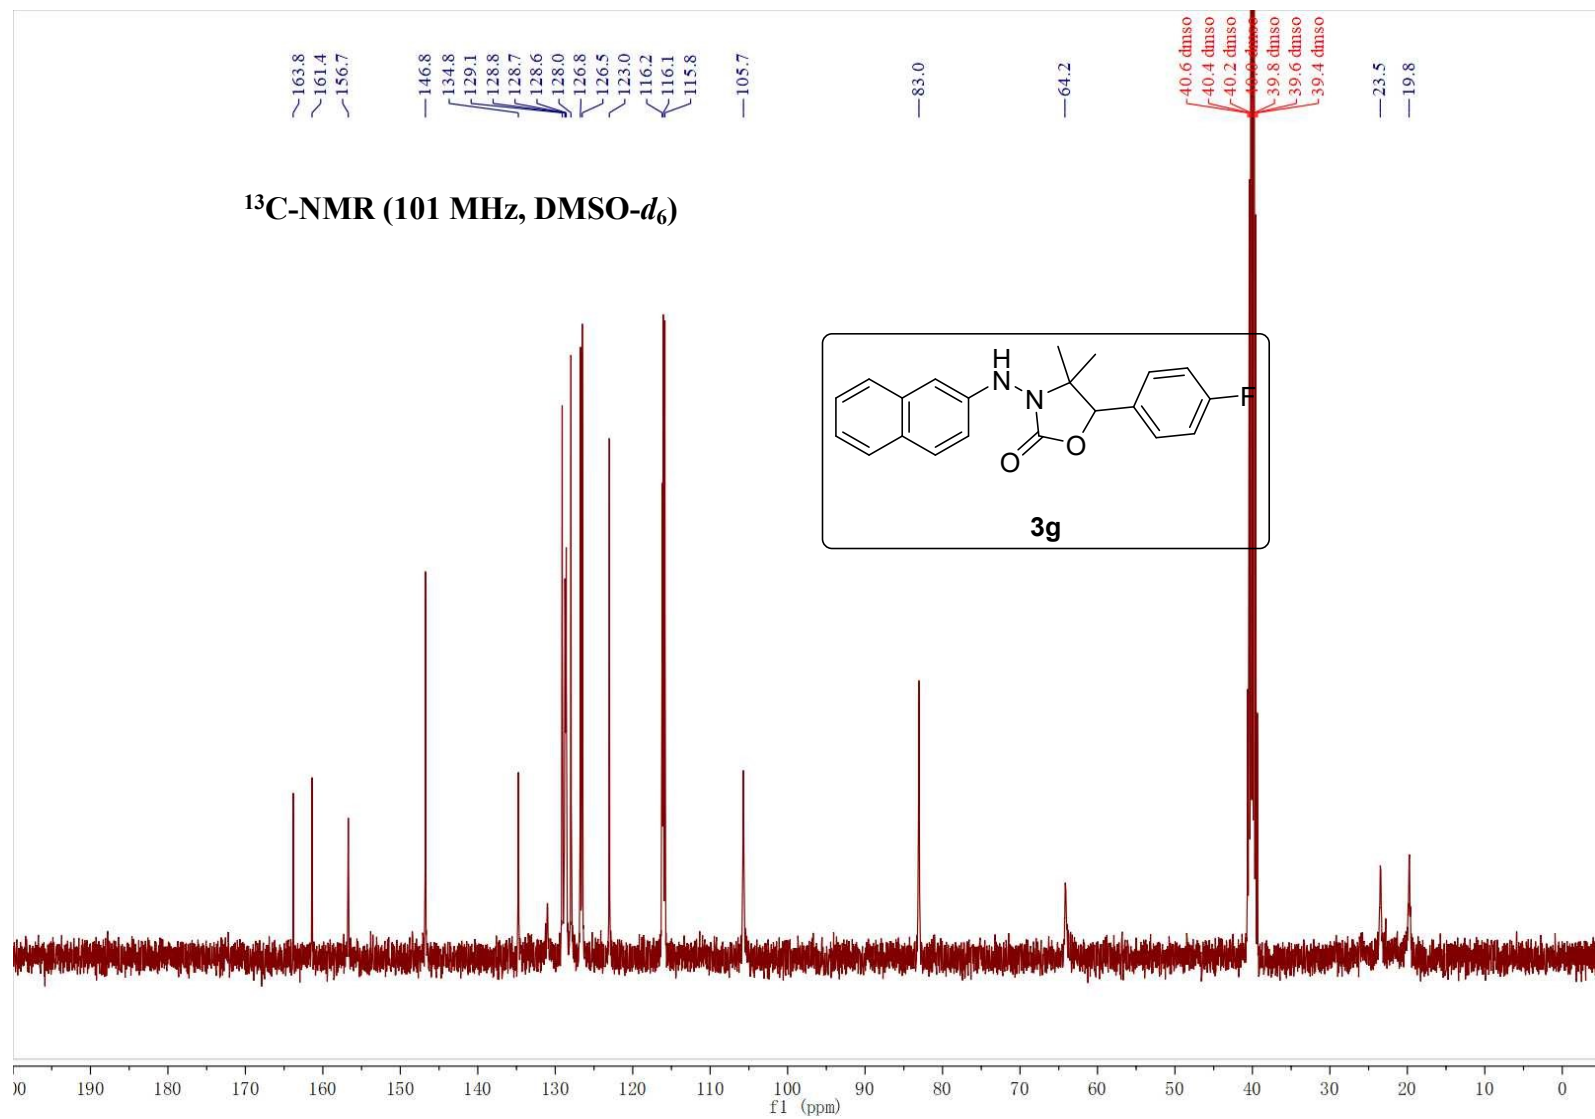

**<sup>19</sup>F-NMR (376 MHz, CDCl<sub>3</sub>)**

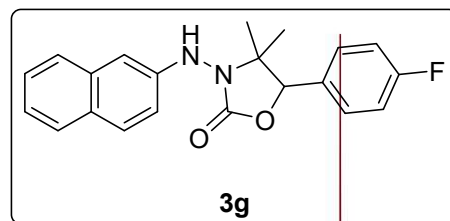

→ -112.55

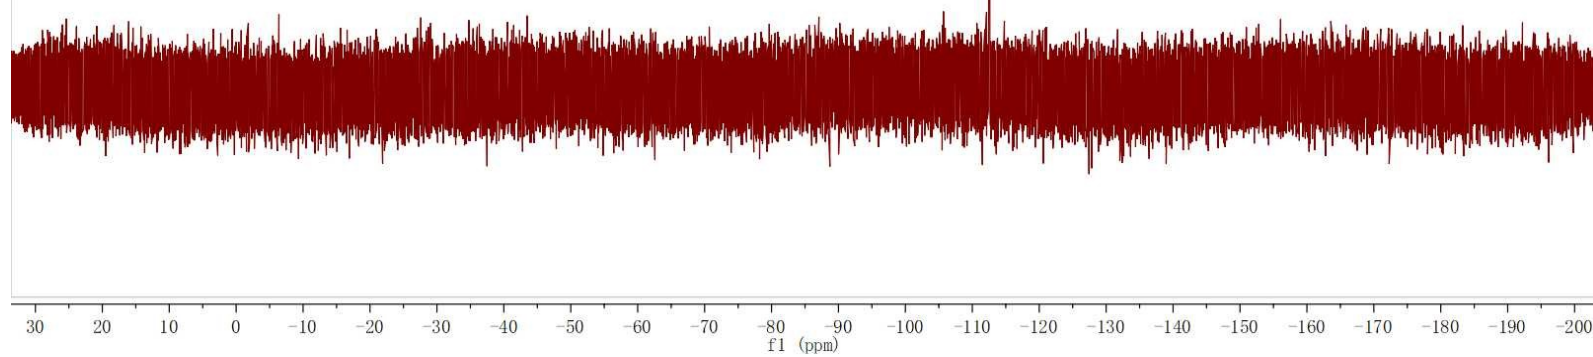

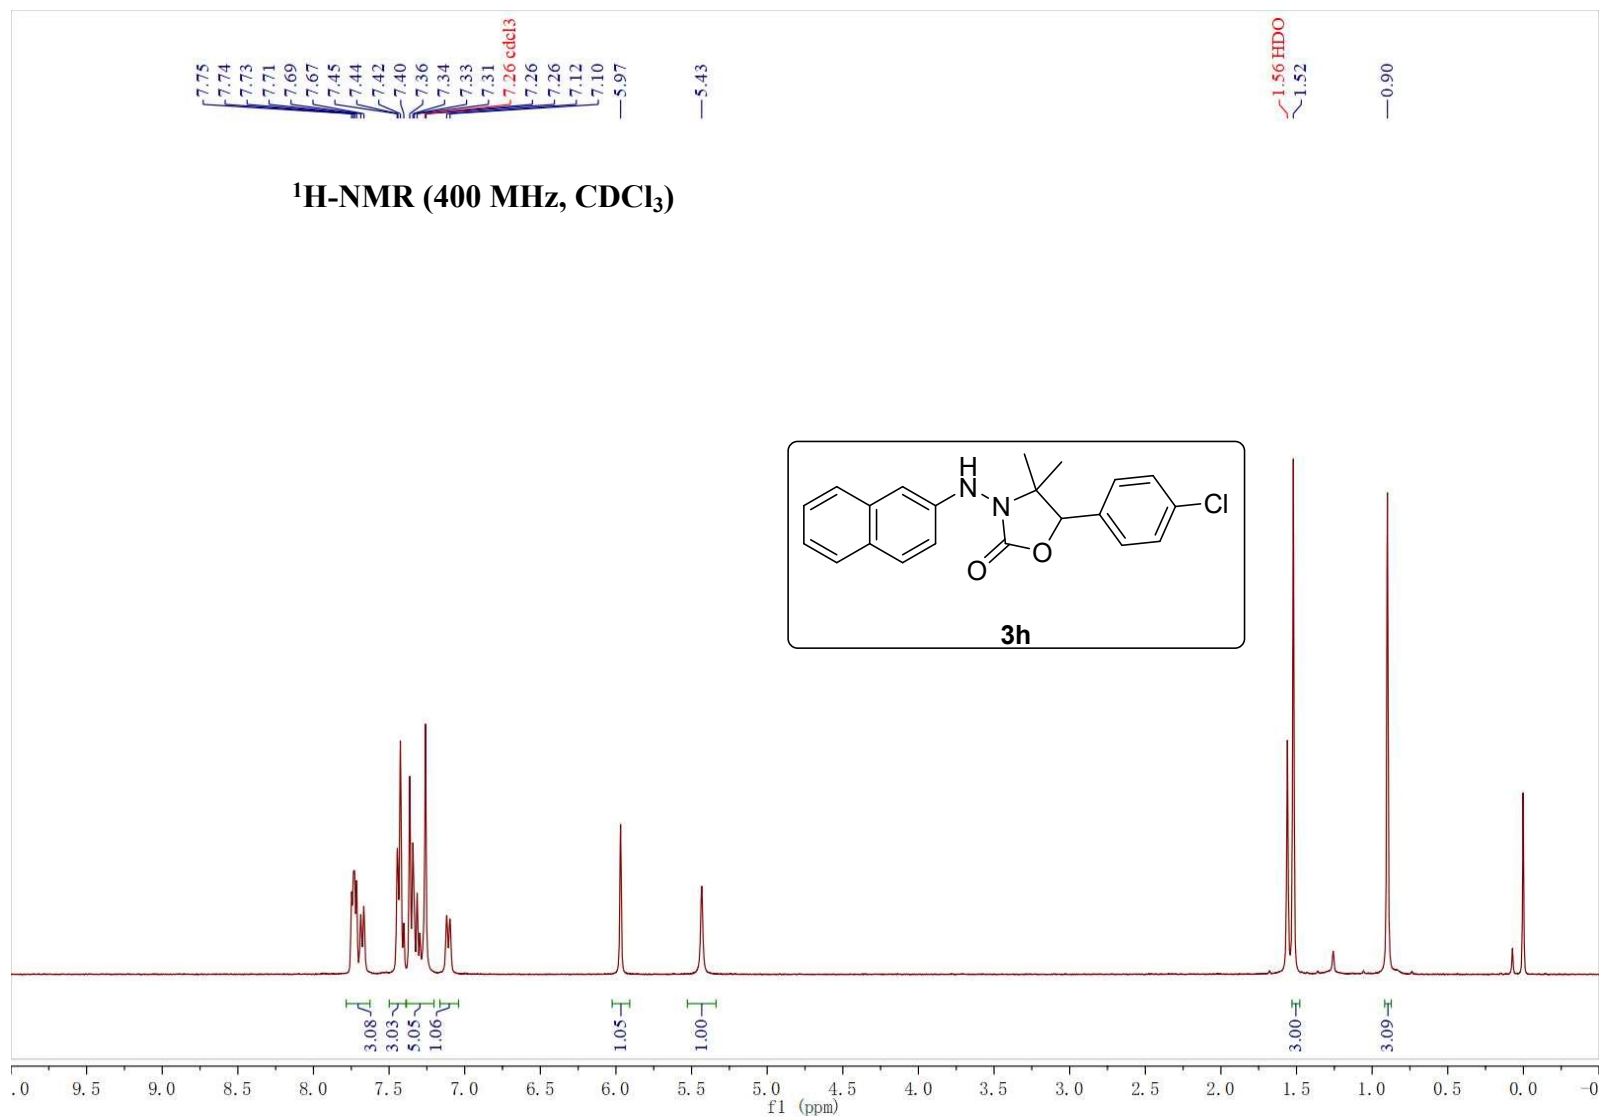

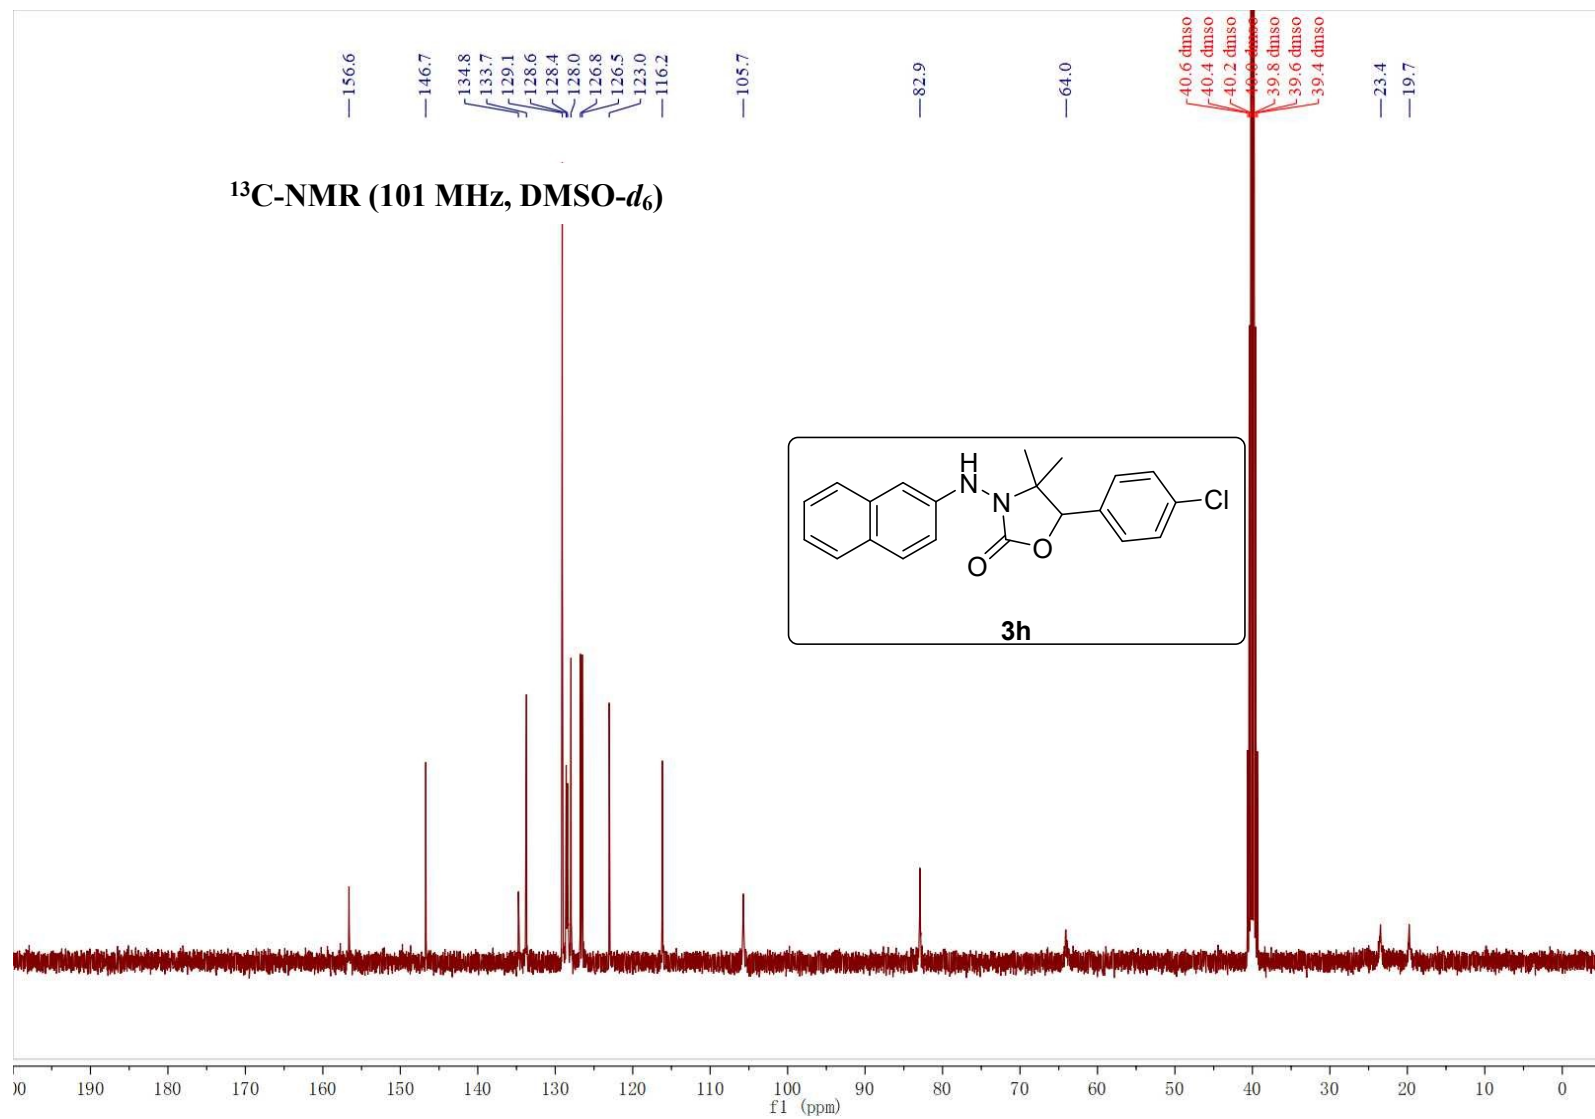



**<sup>1</sup>H-NMR (400 MHz, CDCl<sub>3</sub>)**

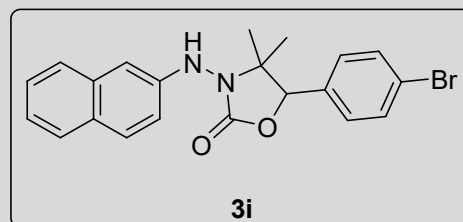

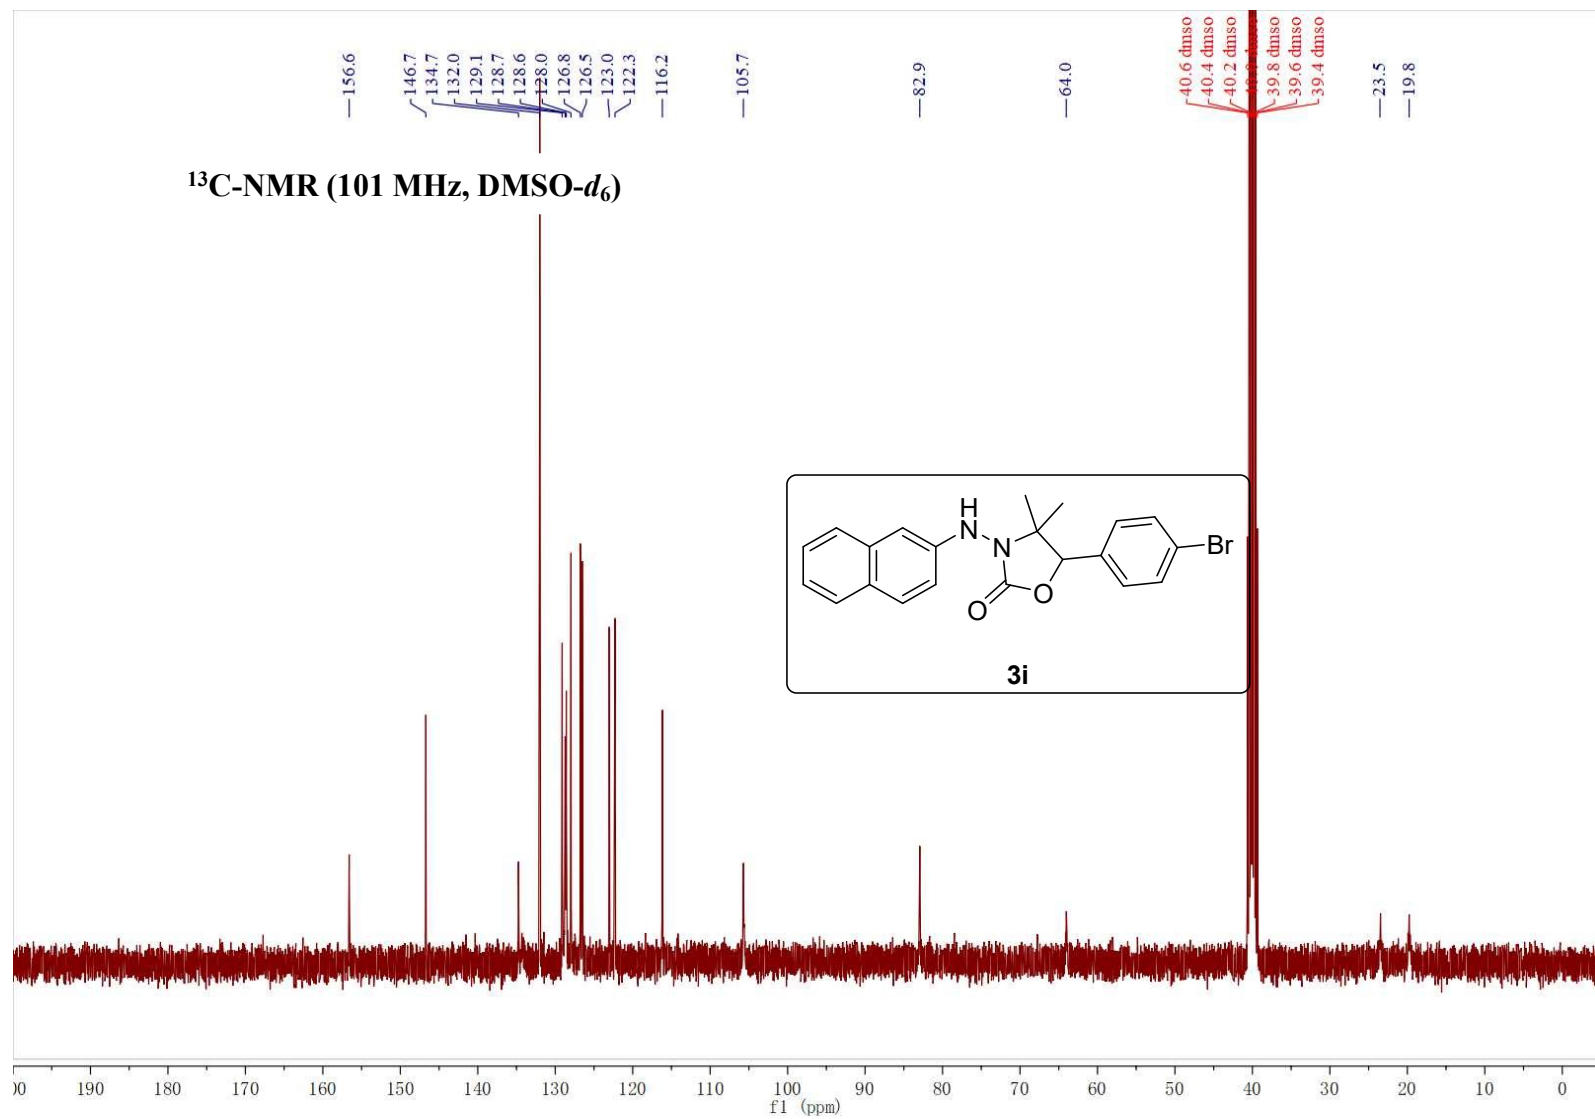

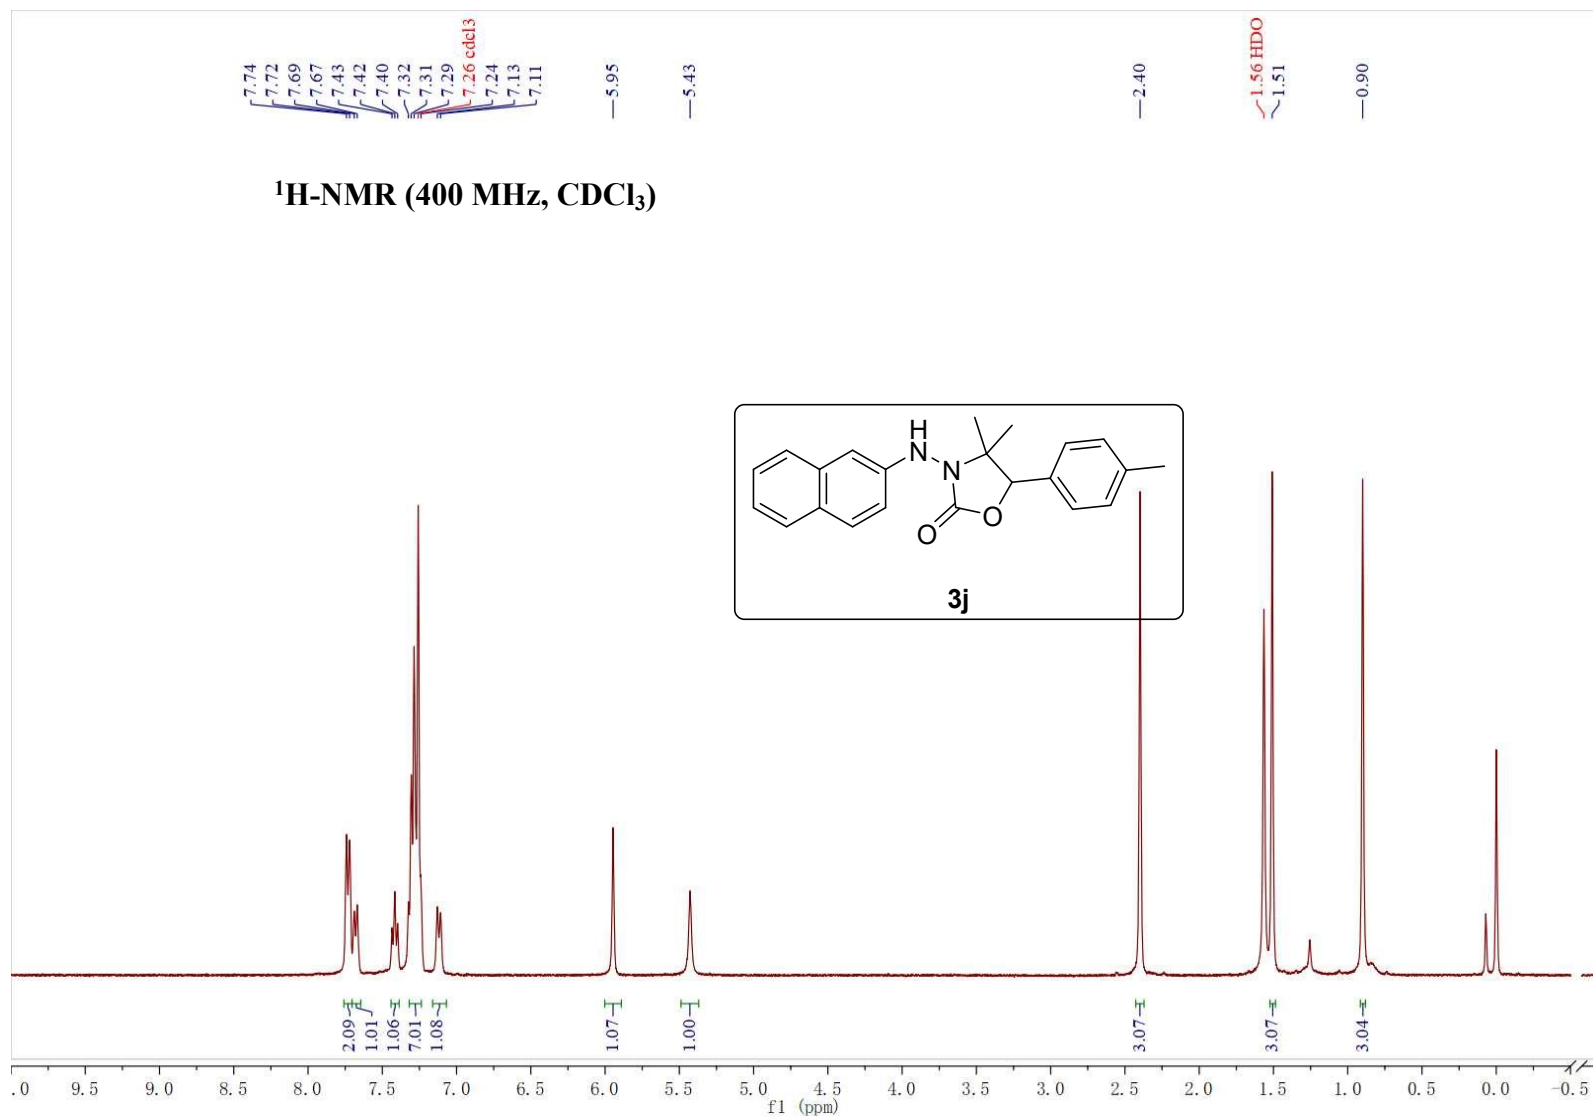

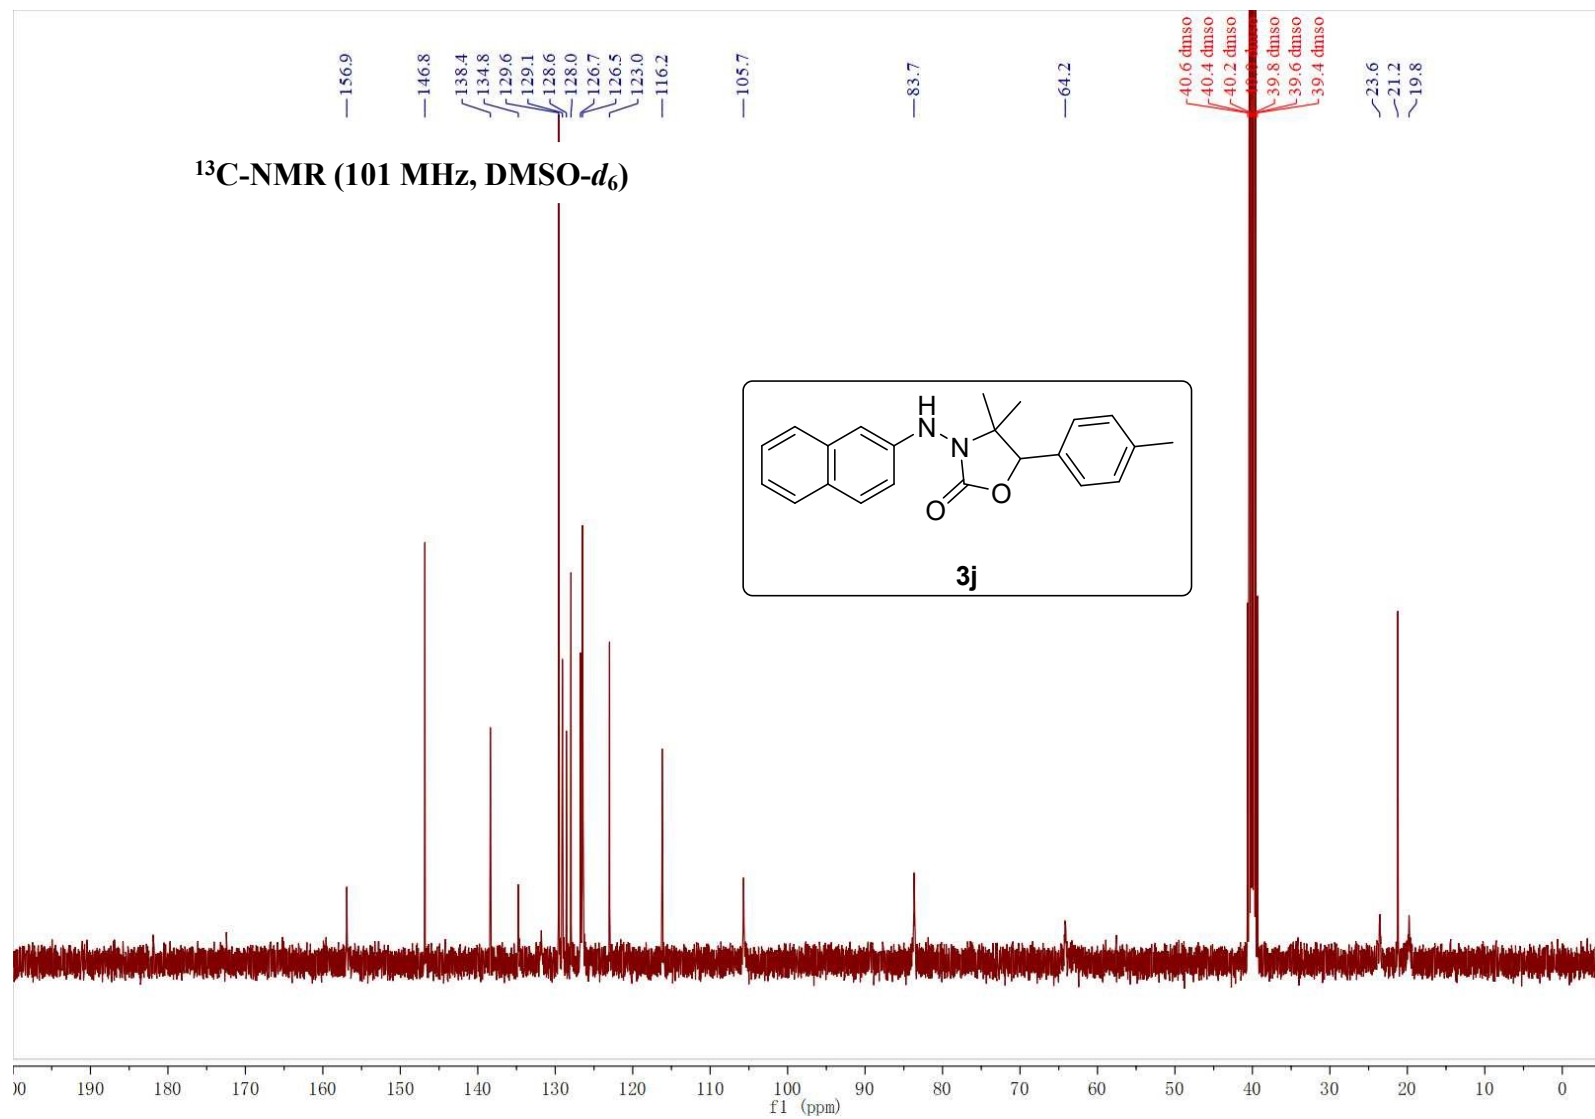

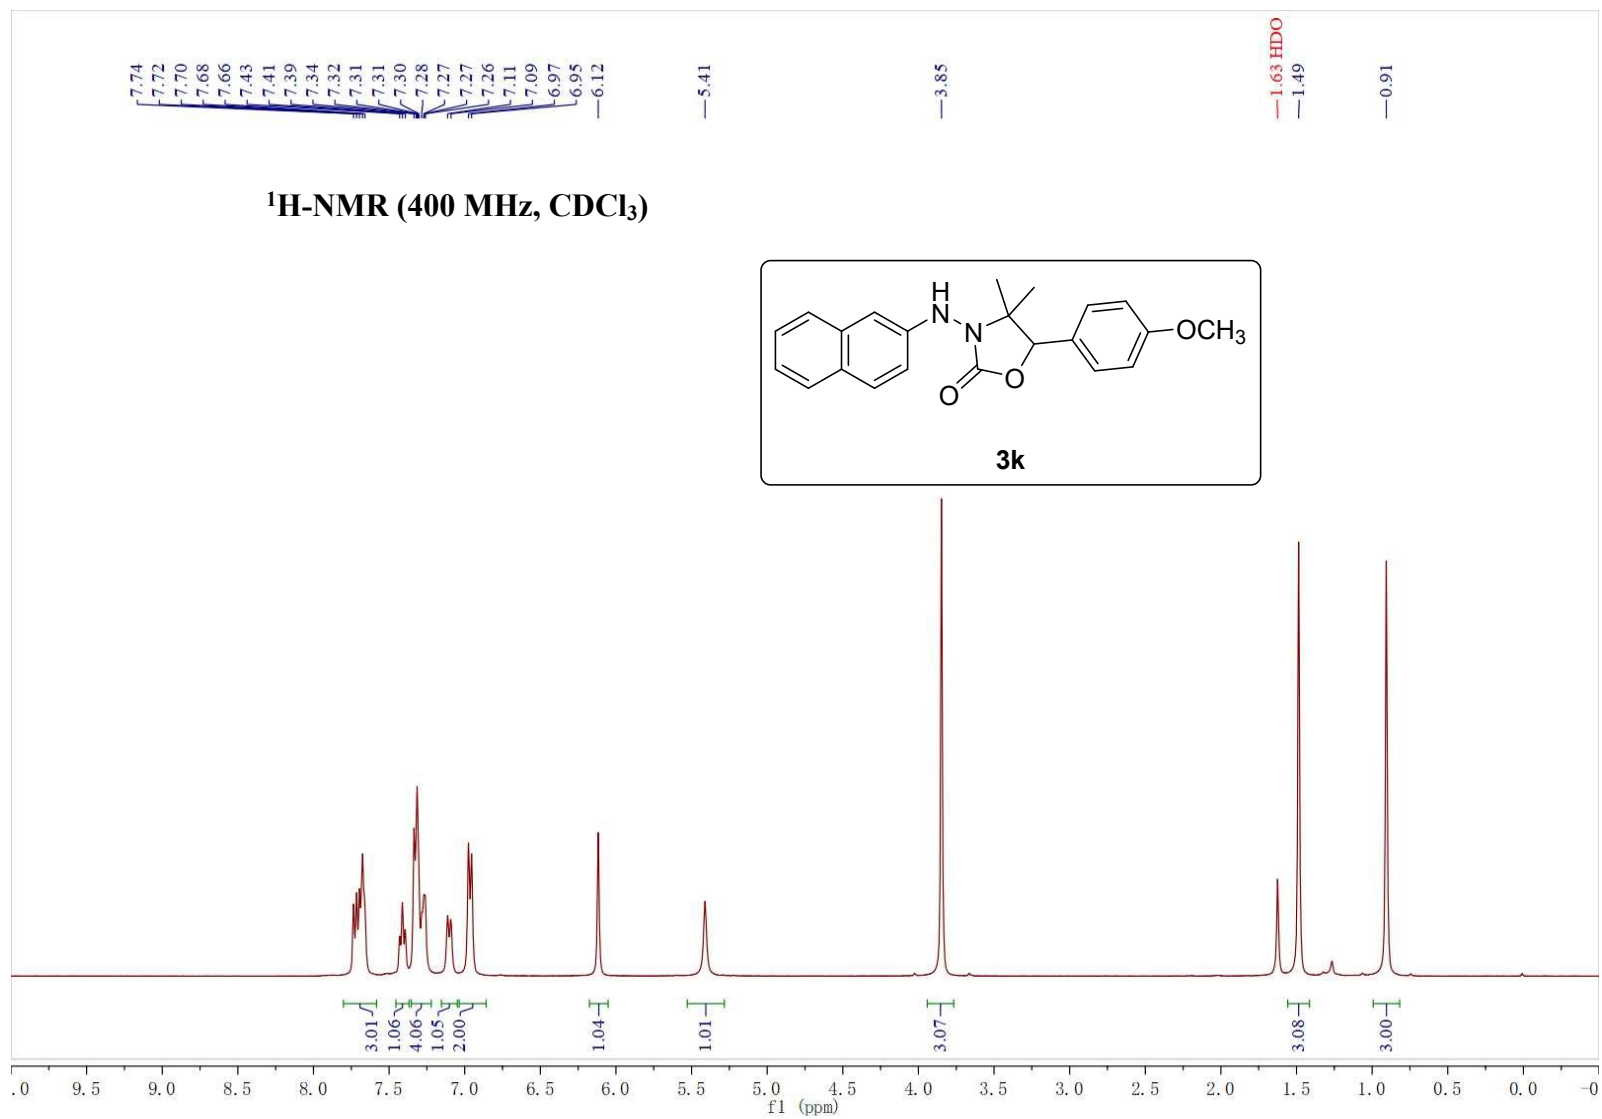

**$^{13}\text{C}$ -NMR (101 MHz,  $\text{DMSO-}d_6$ )**

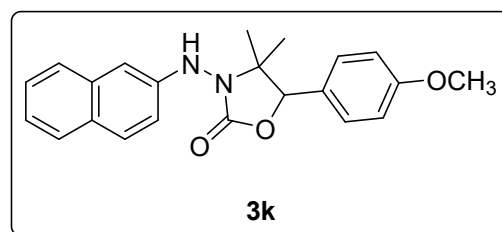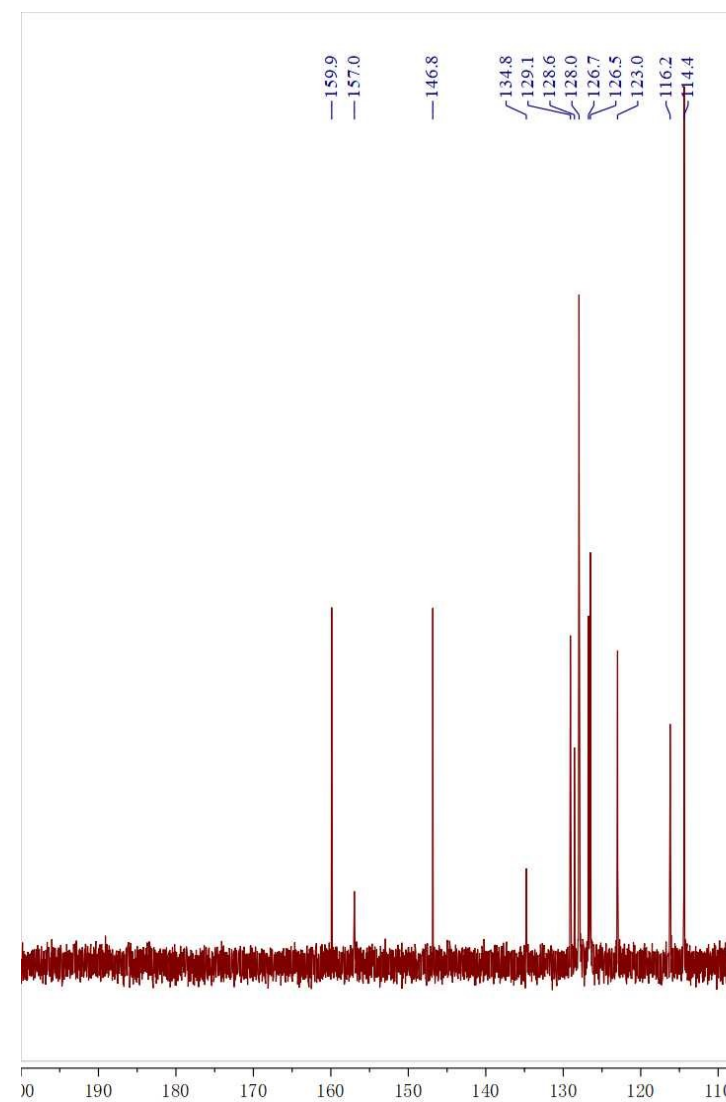

**<sup>1</sup>H-NMR (400 MHz, CDCl<sub>3</sub>)**

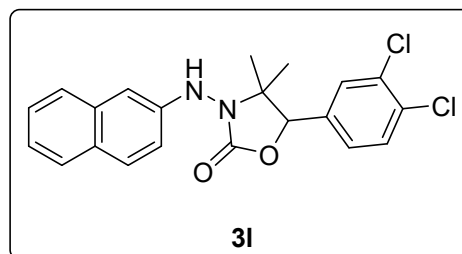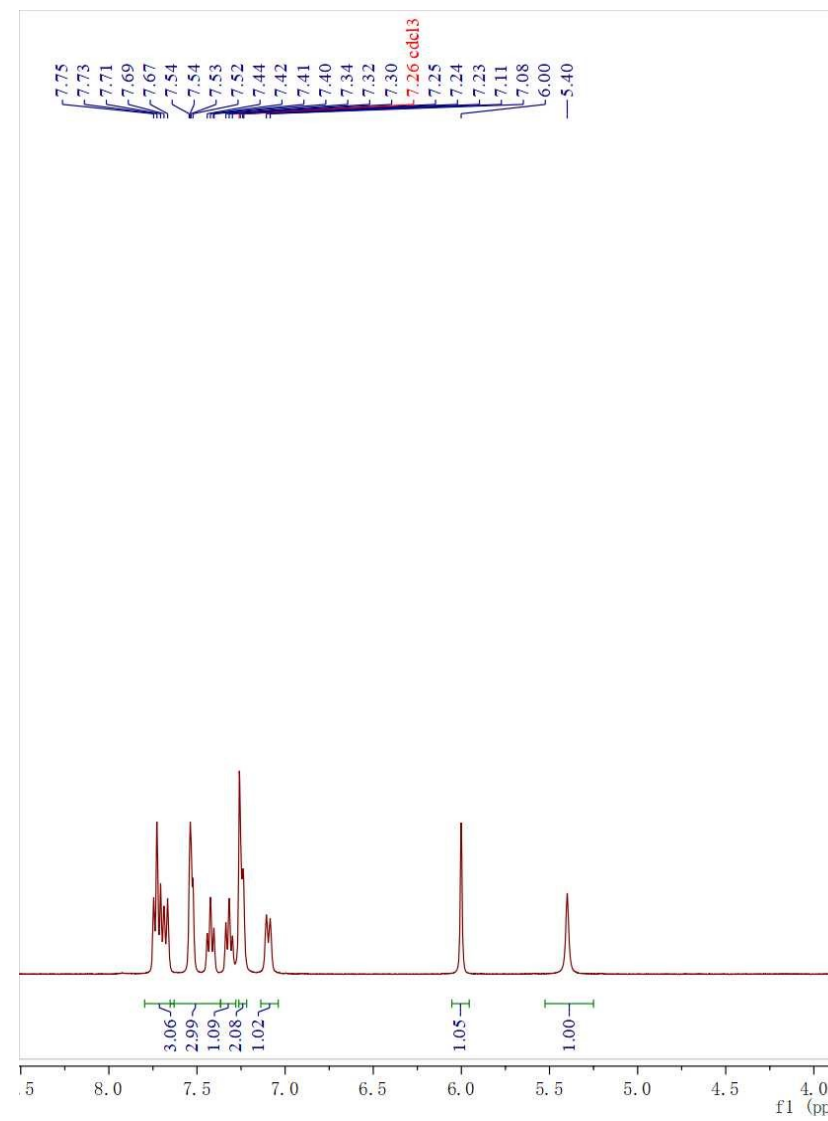

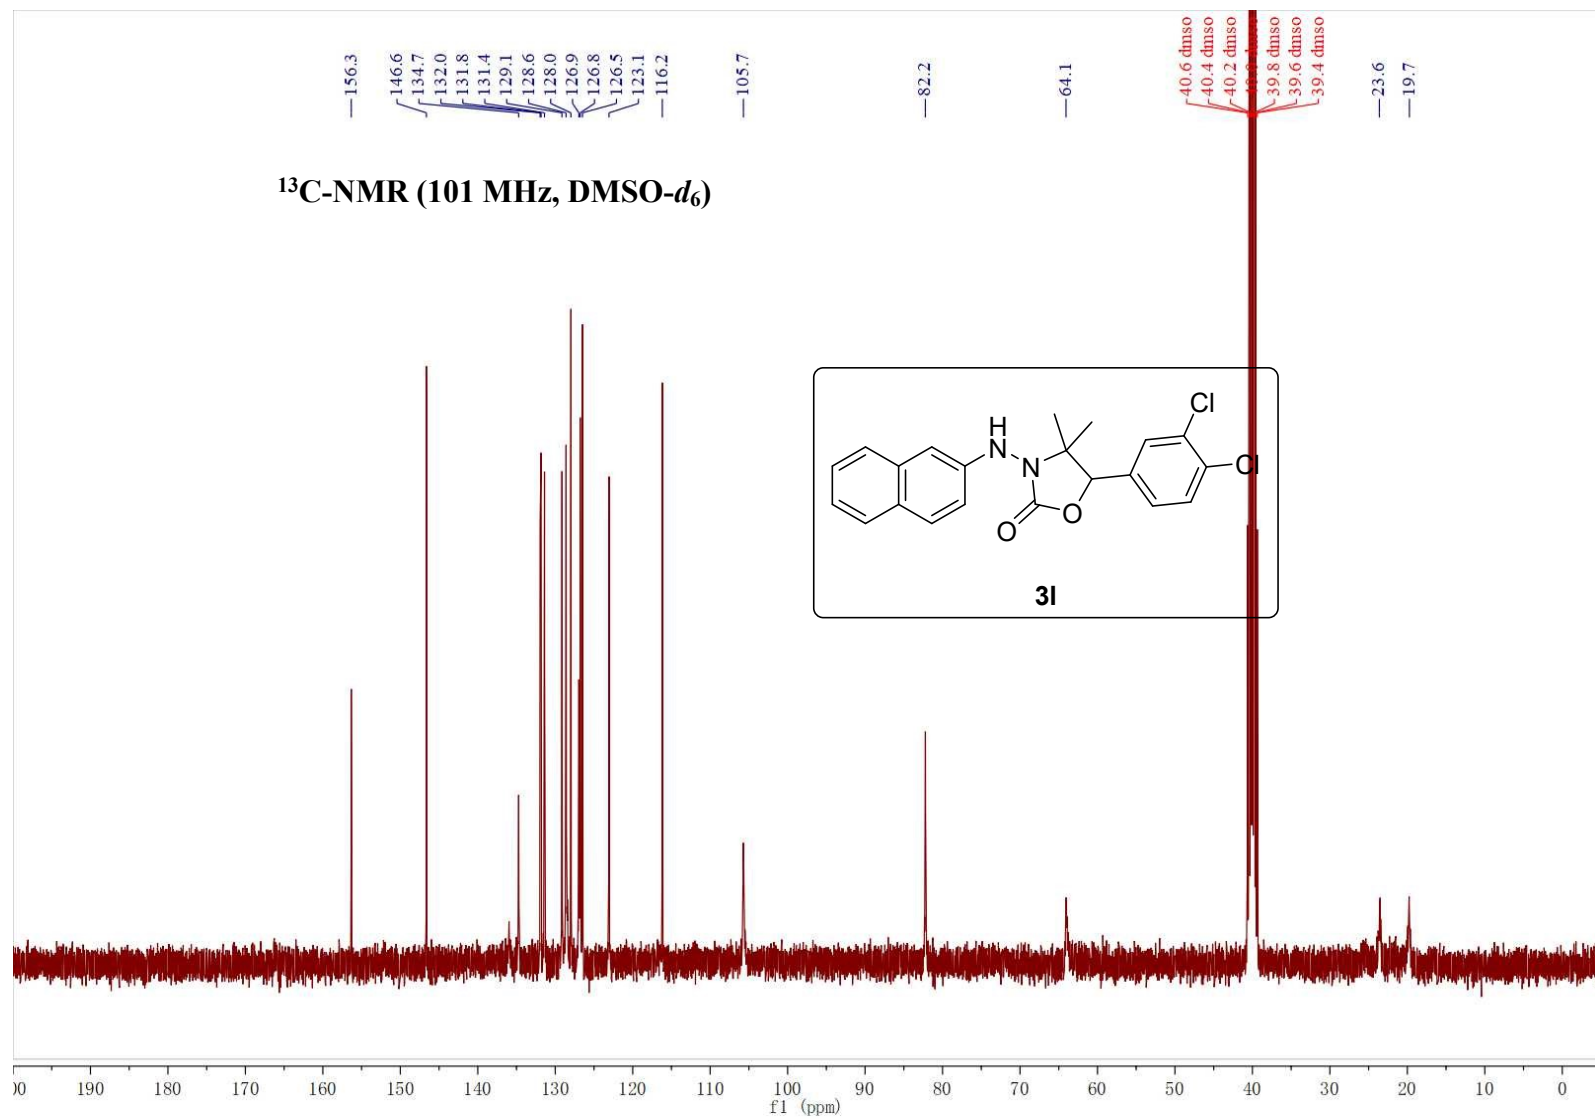



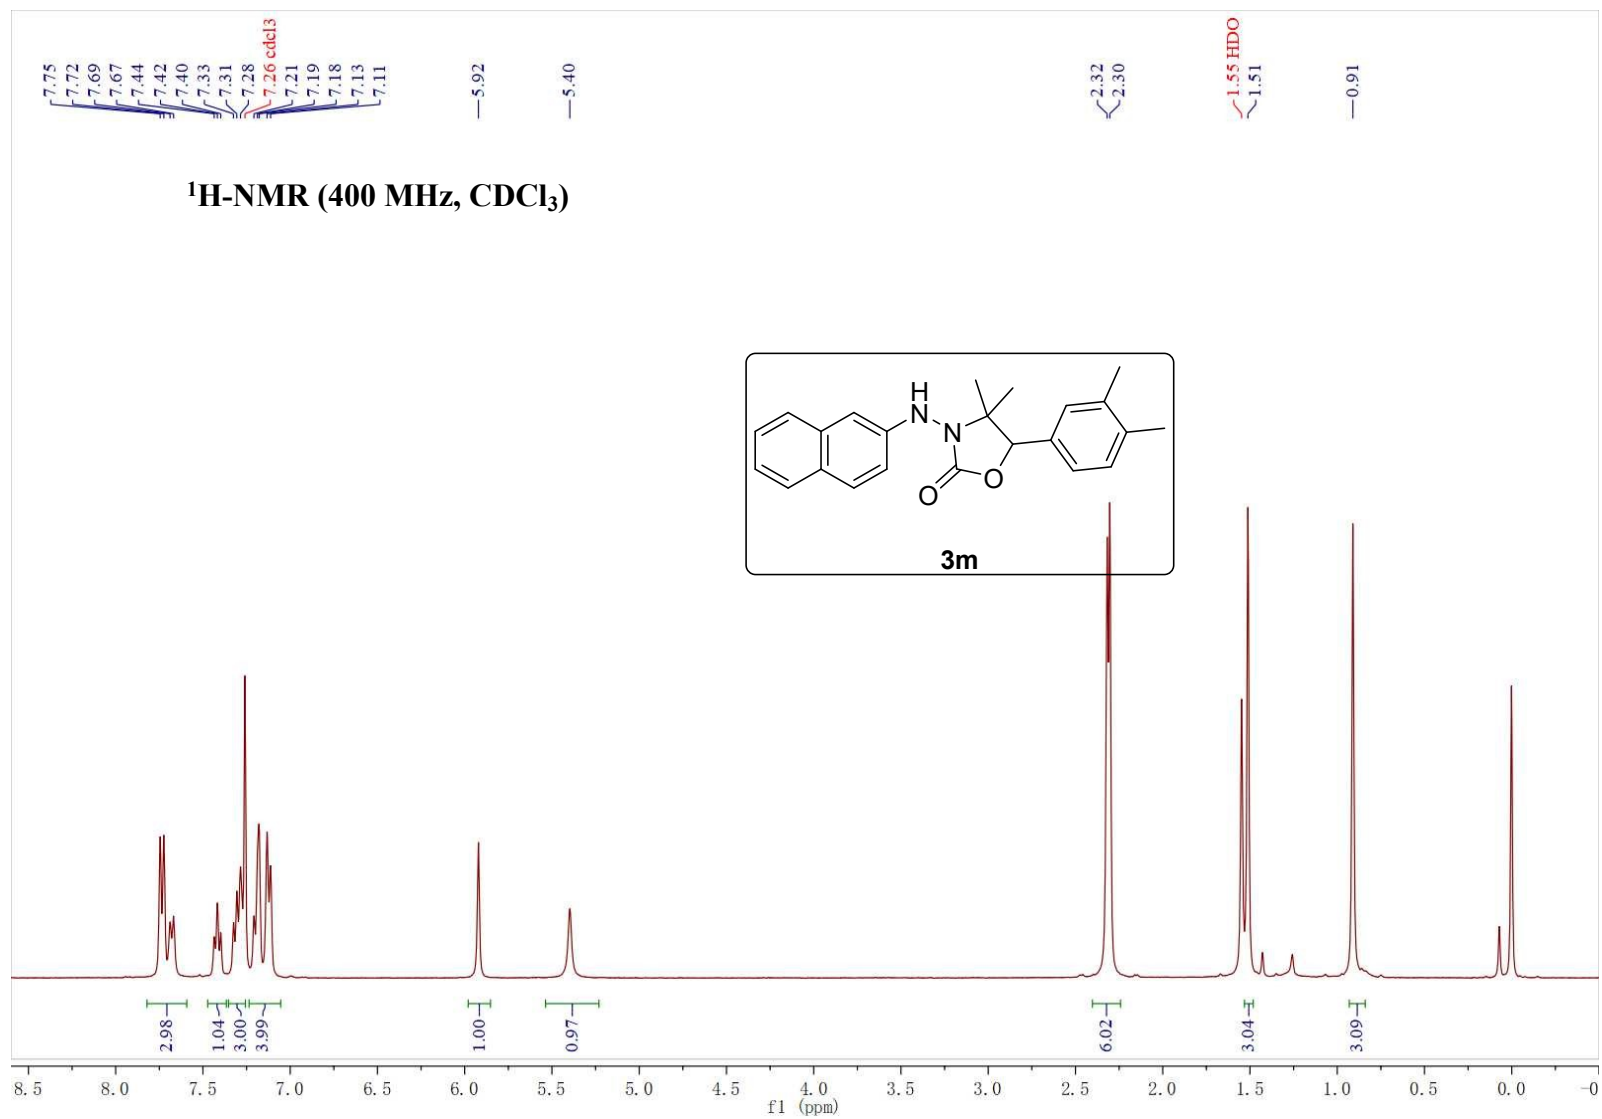

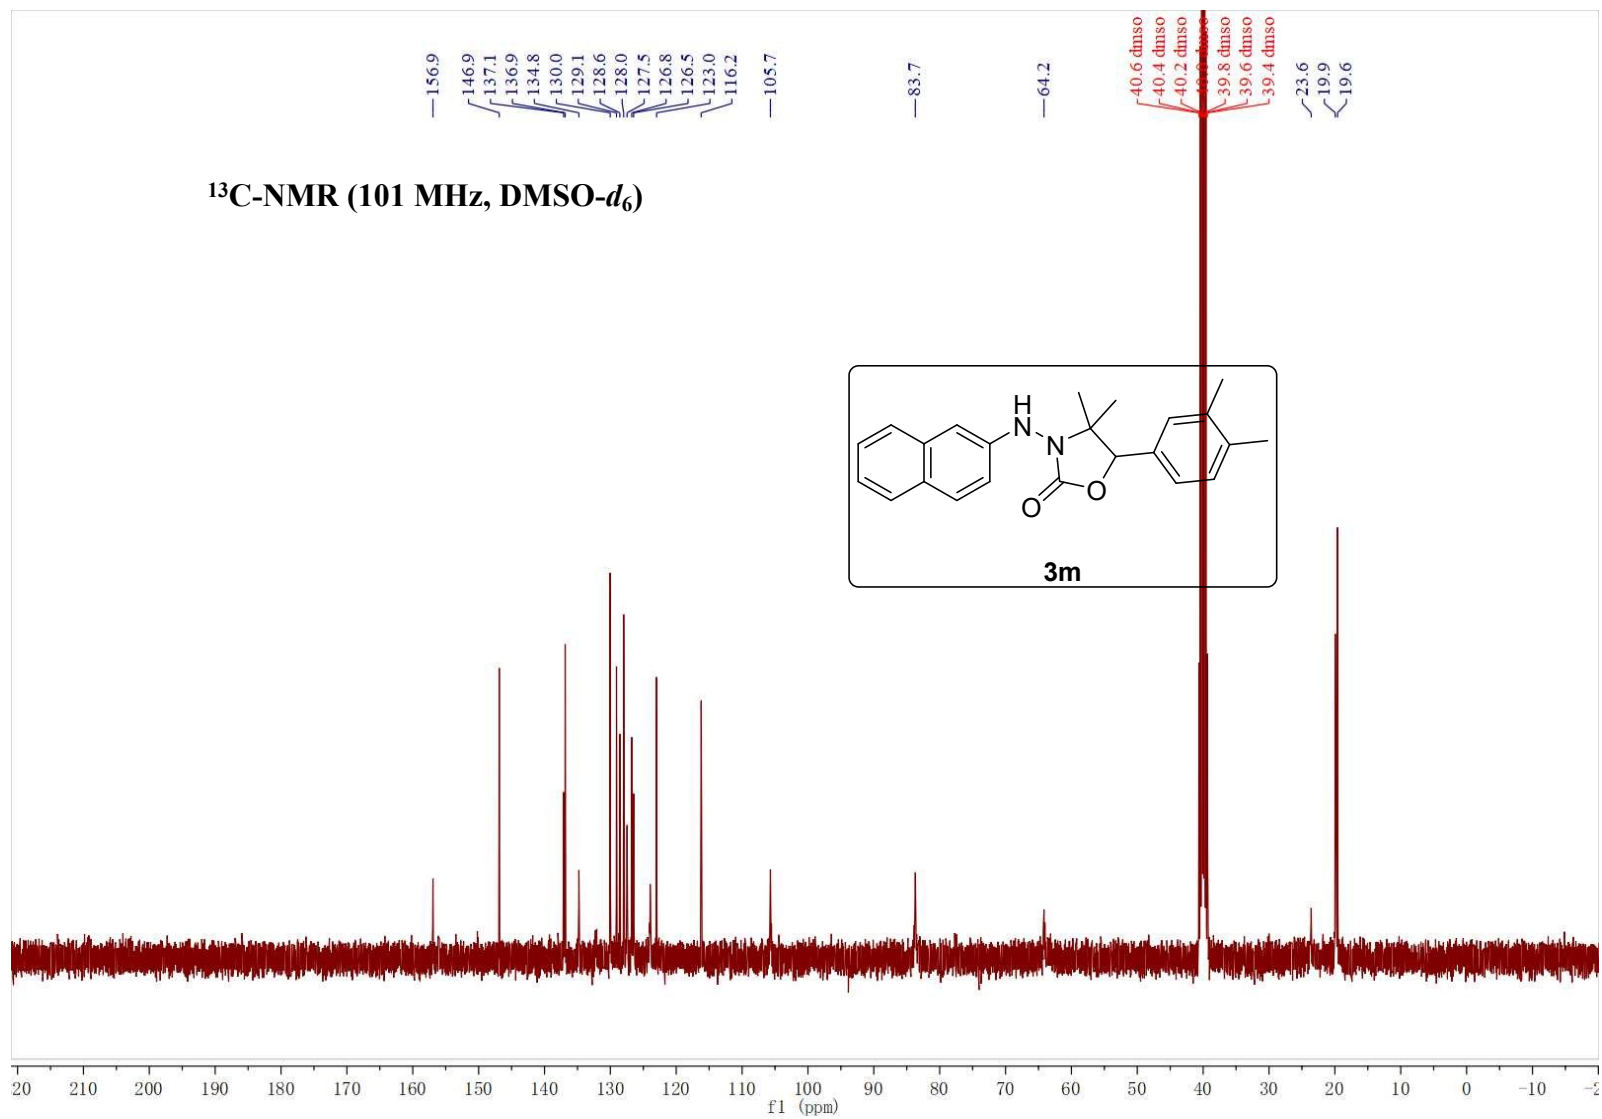

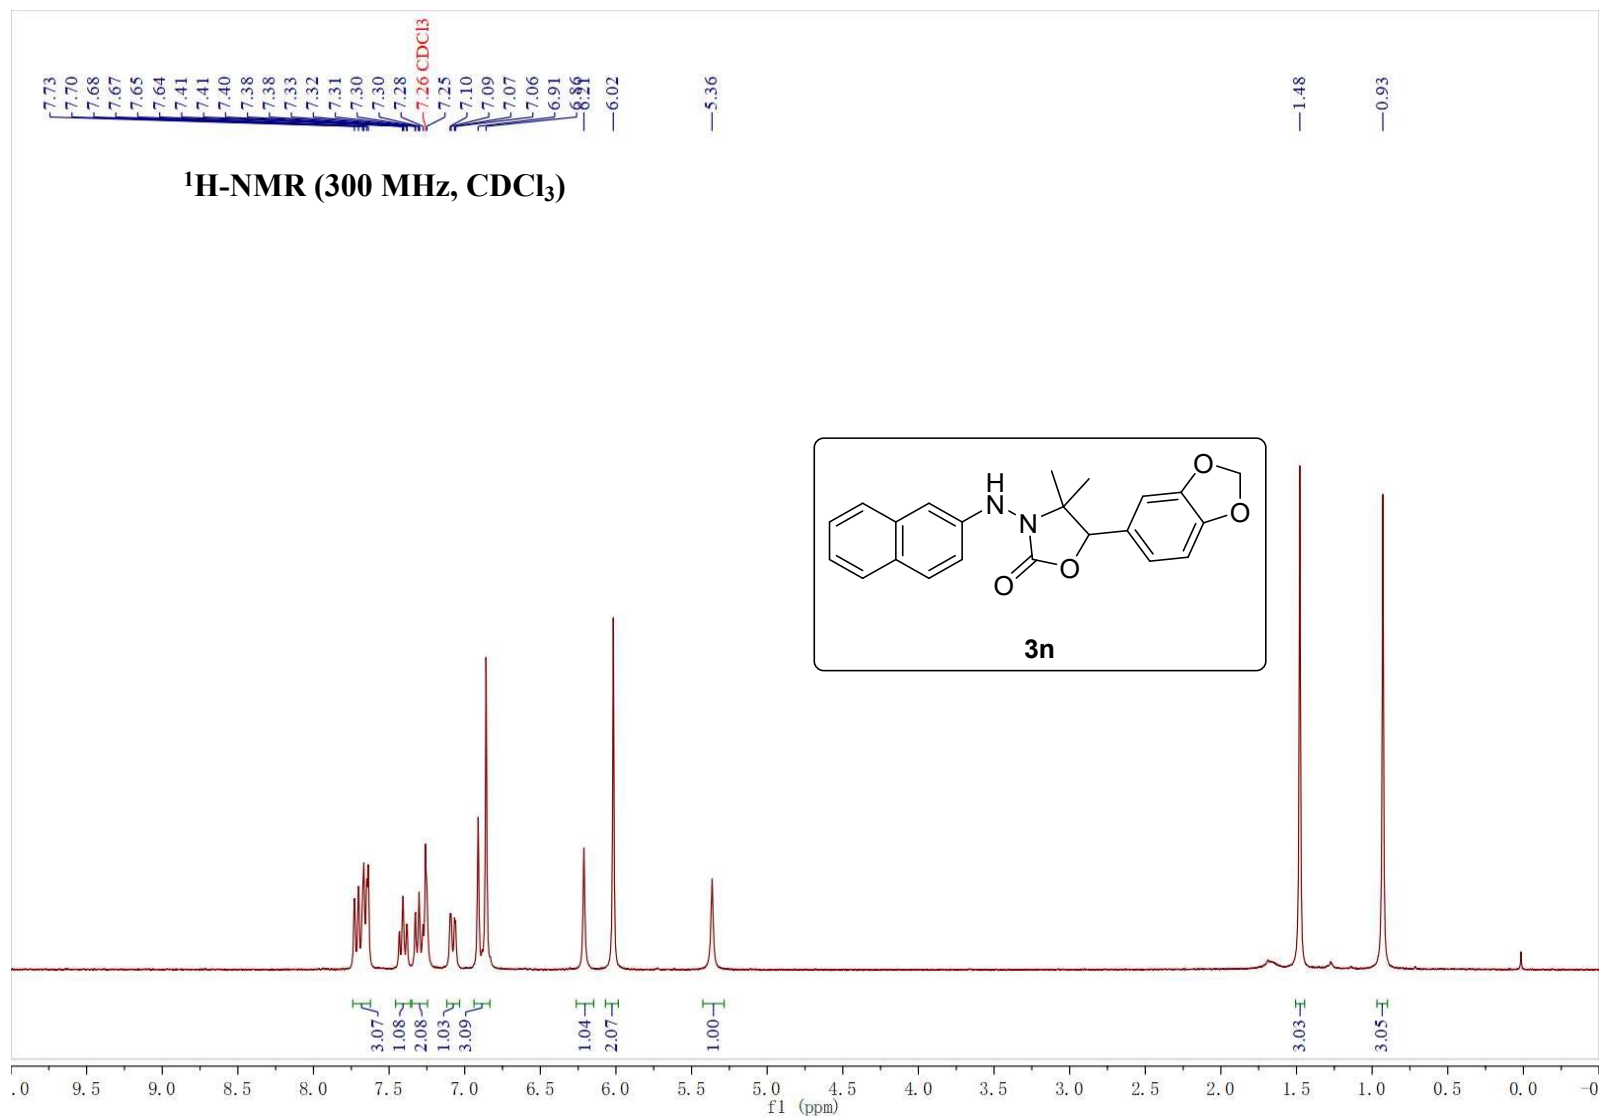

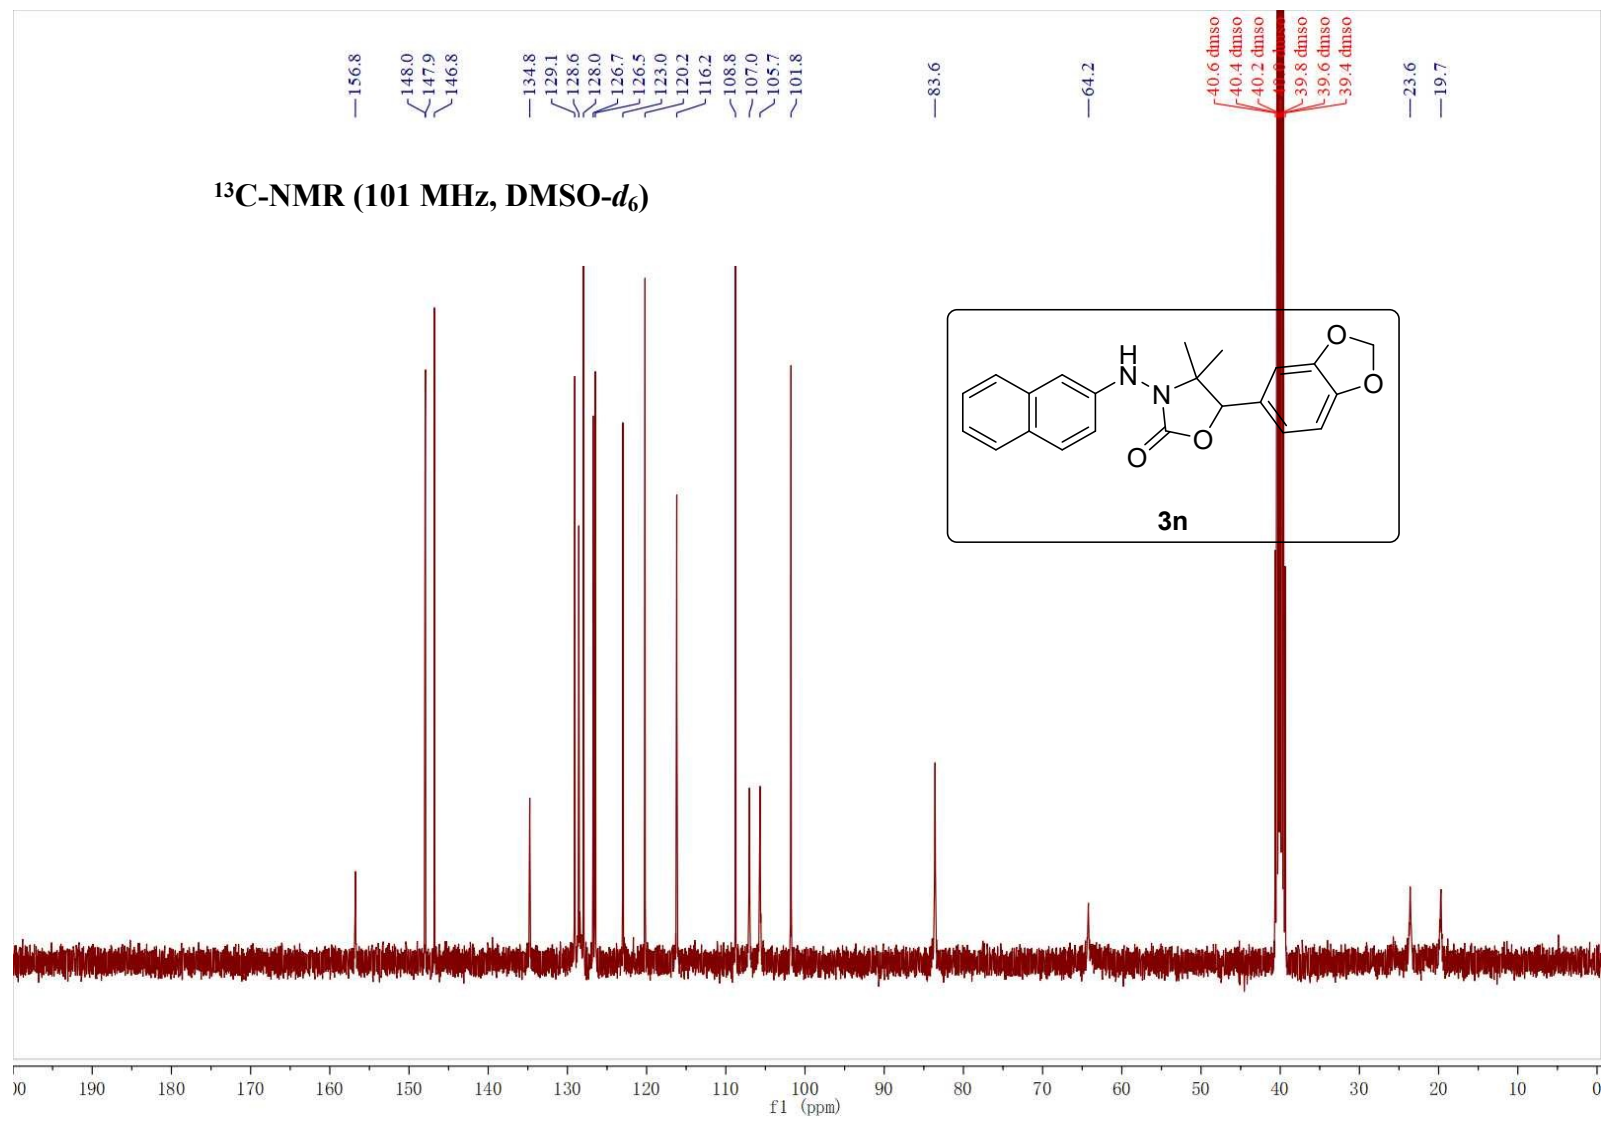

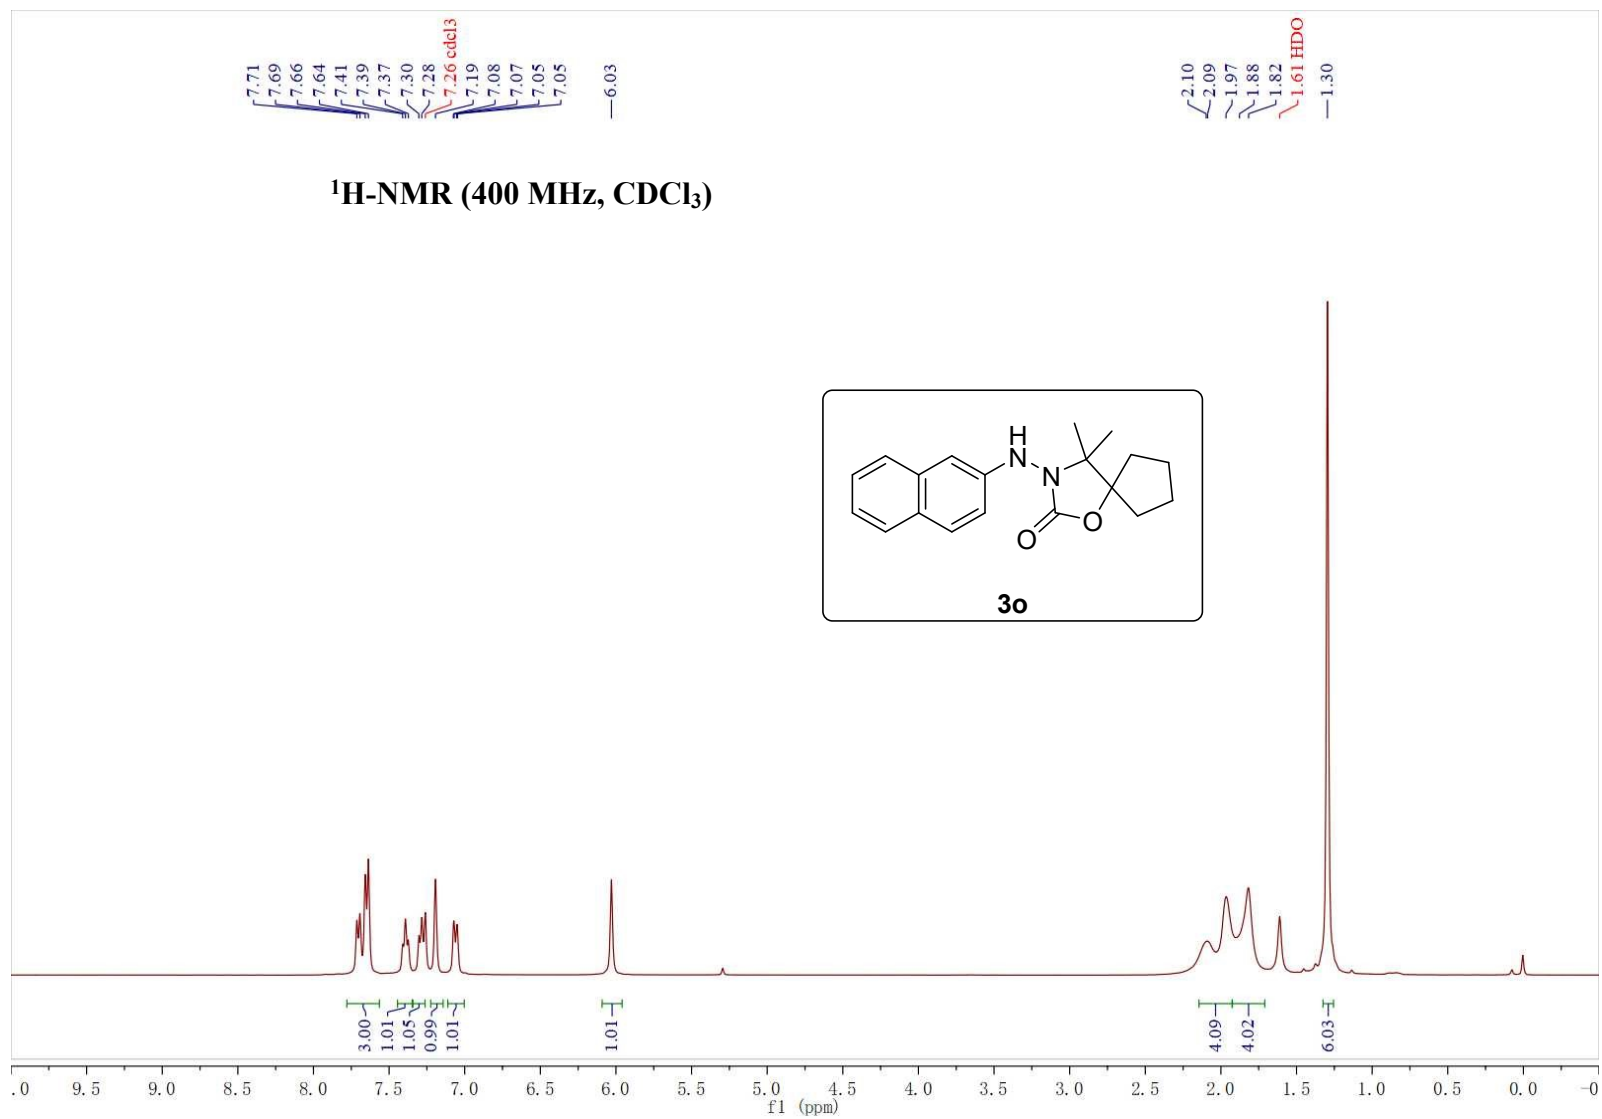

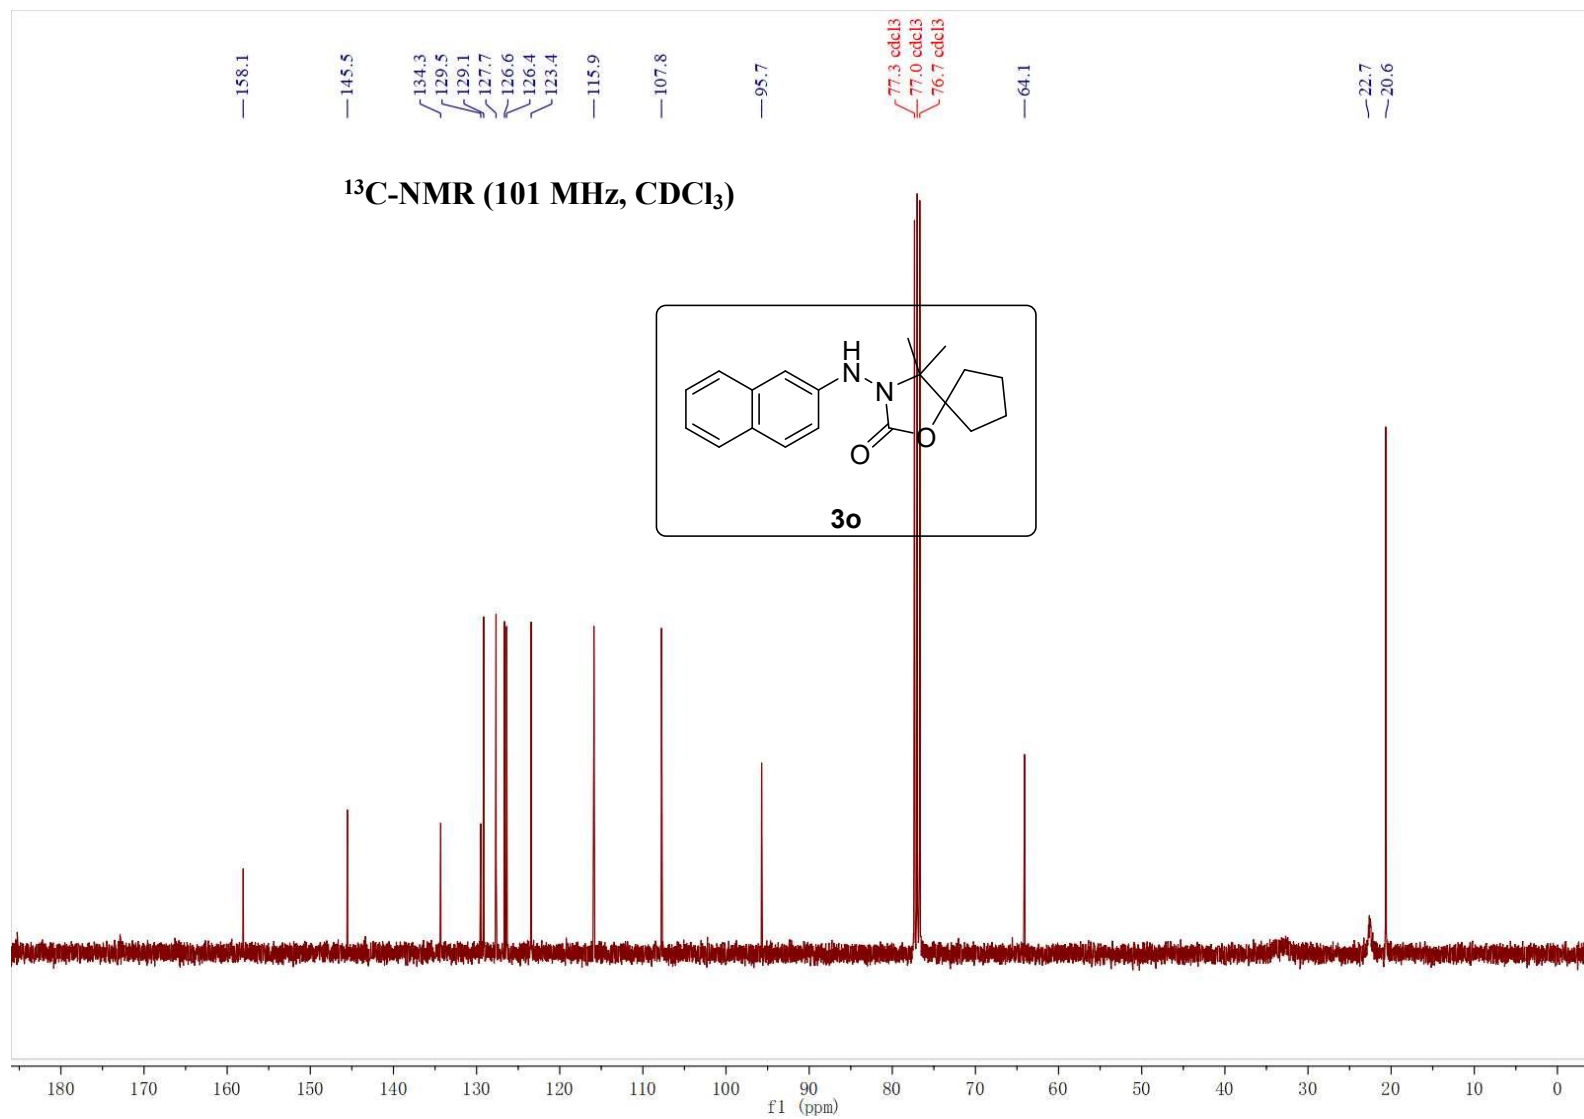

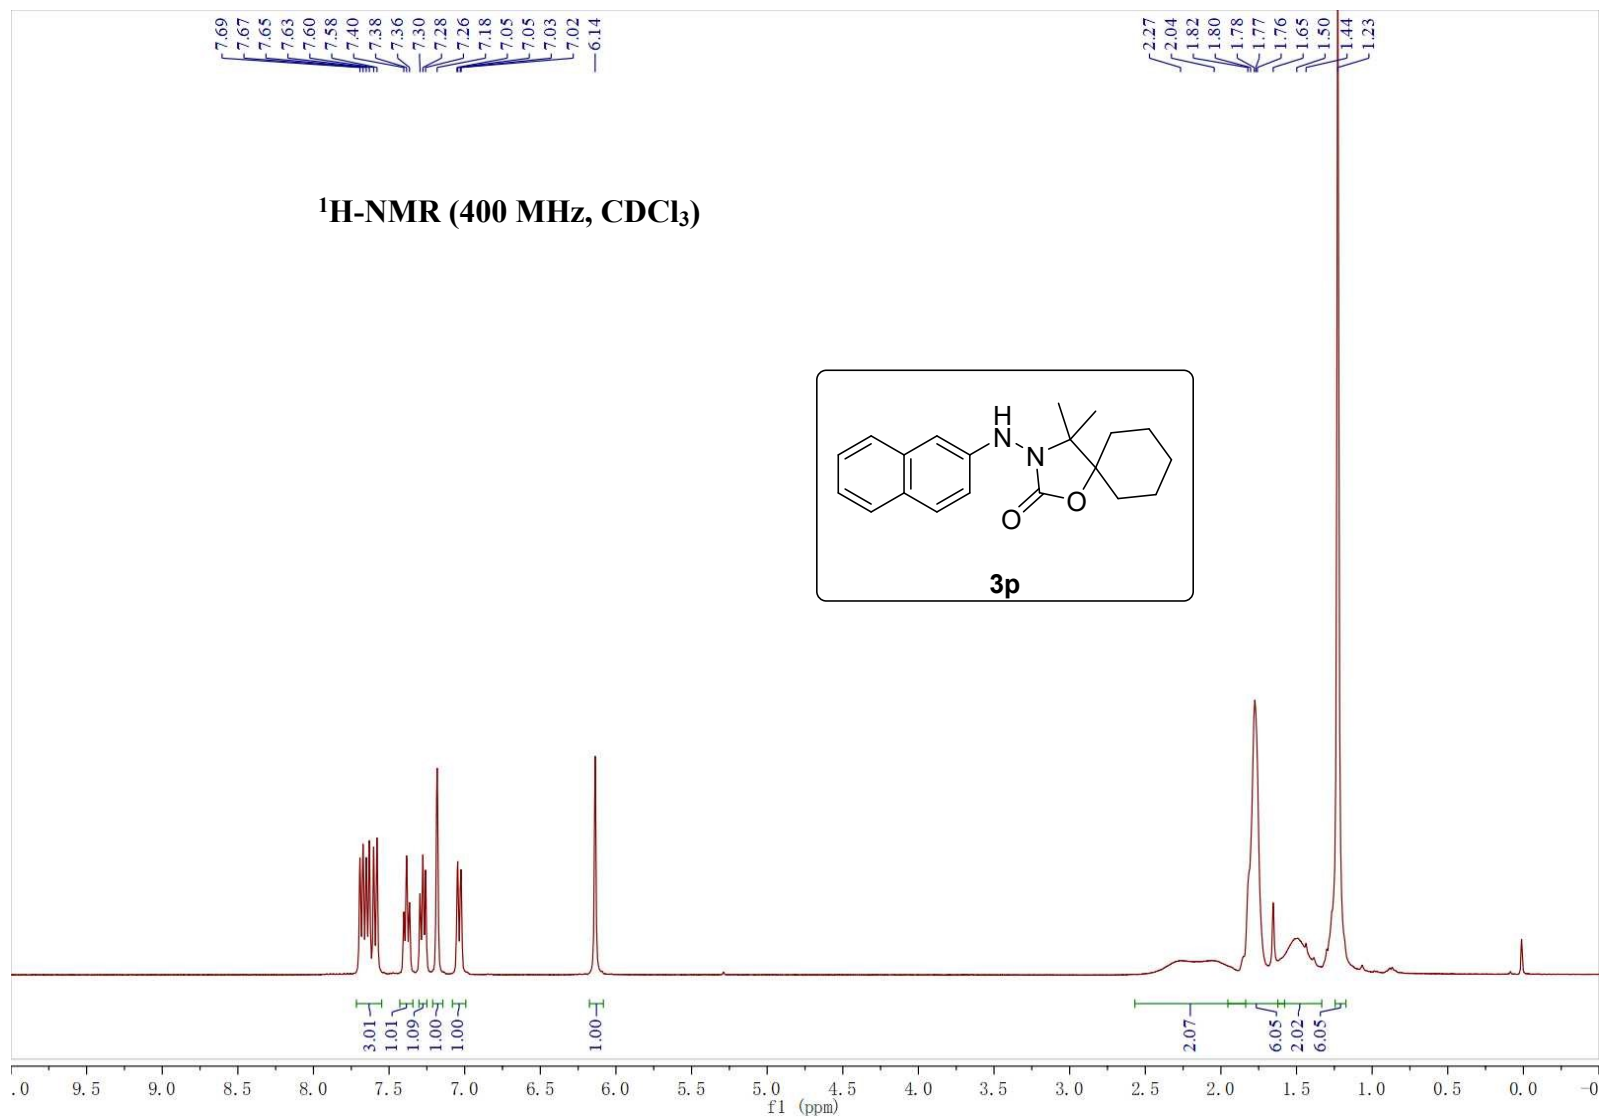

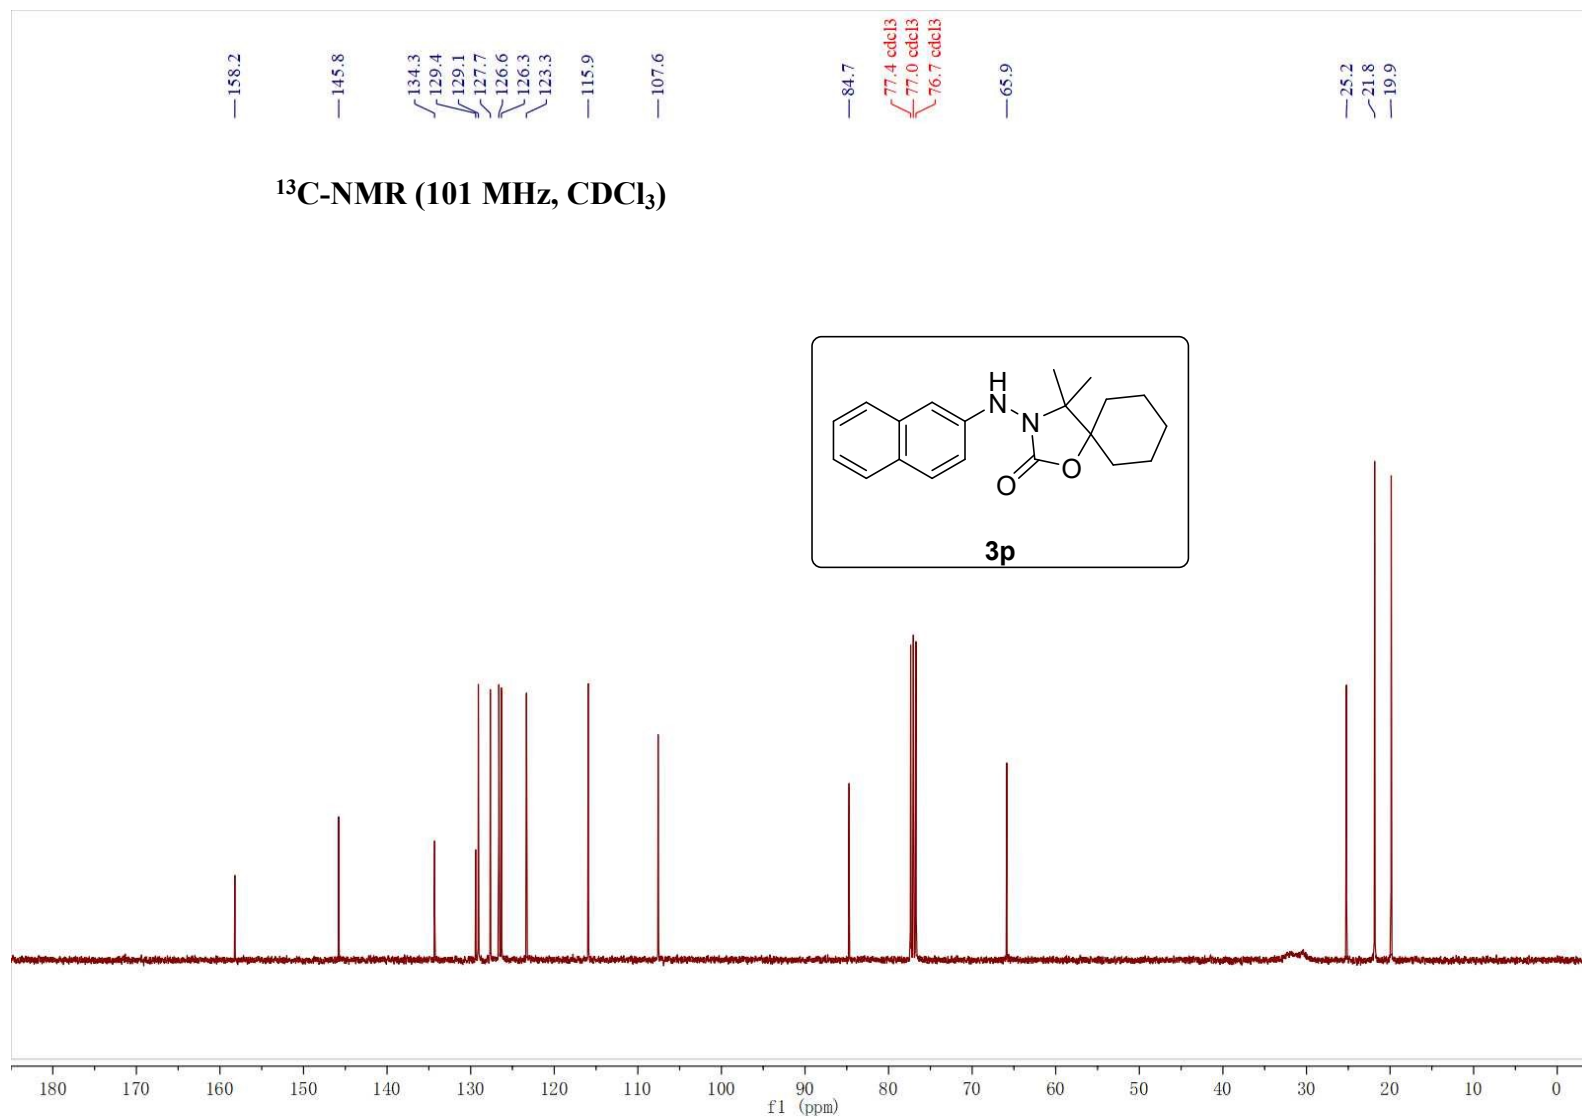



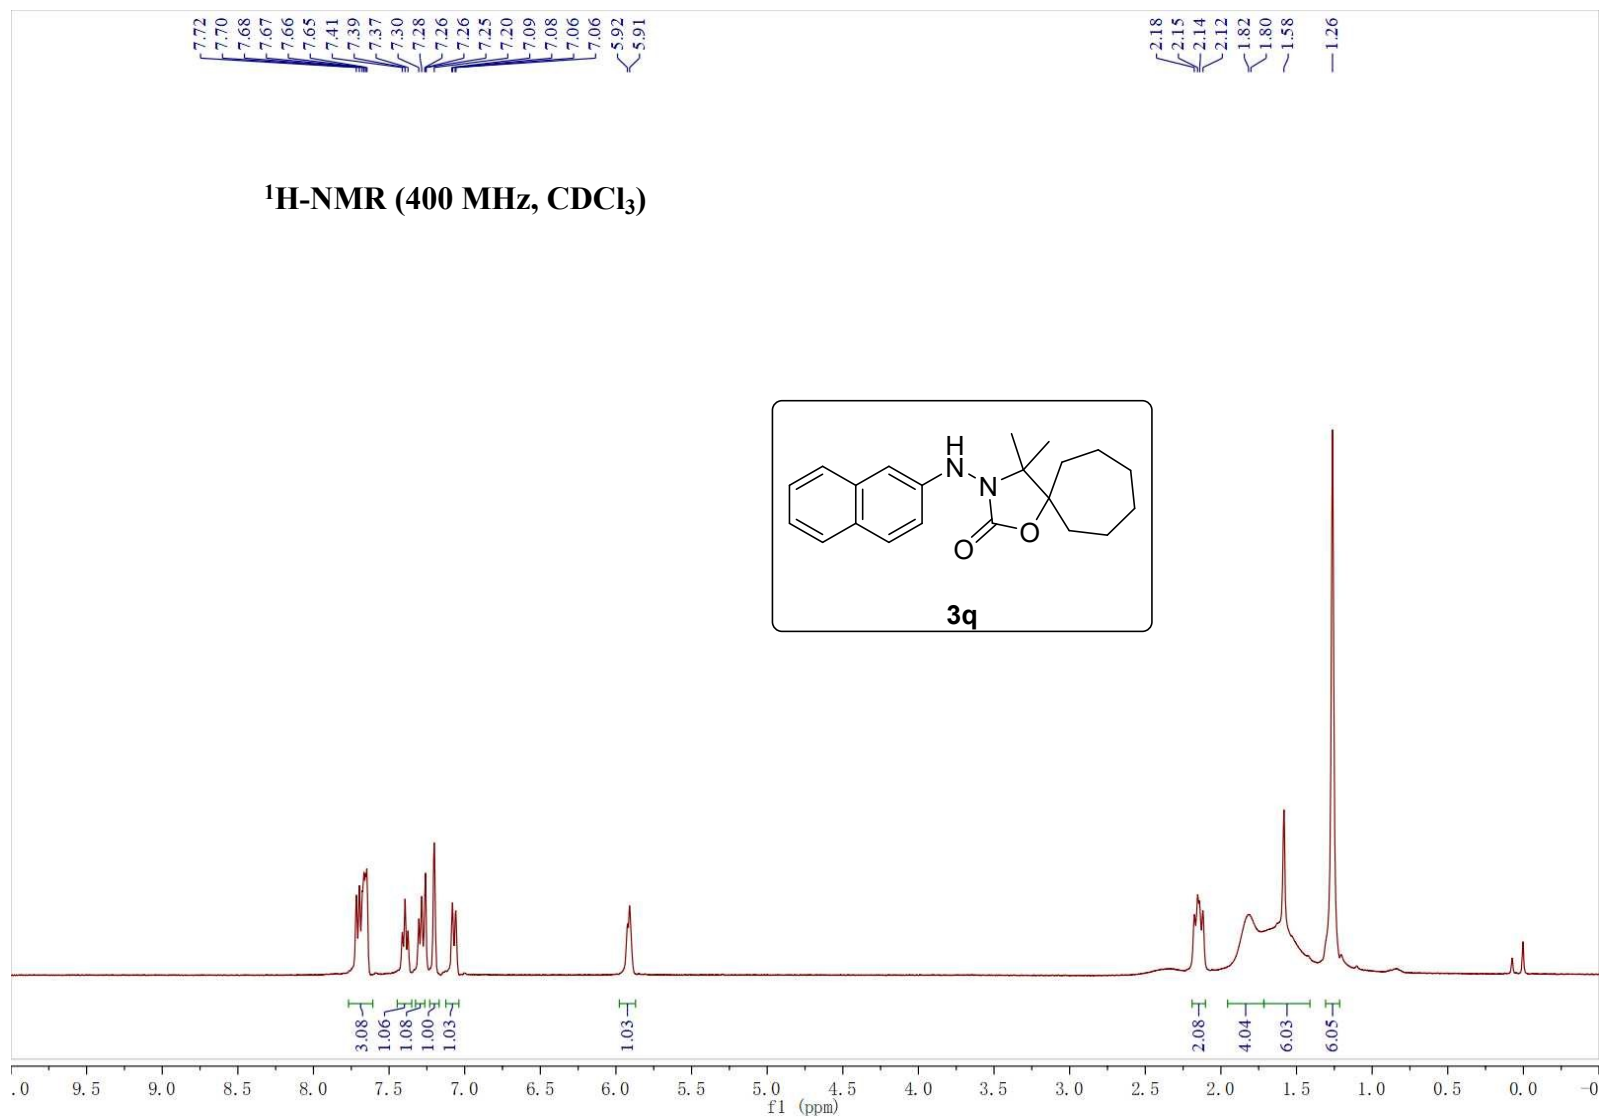

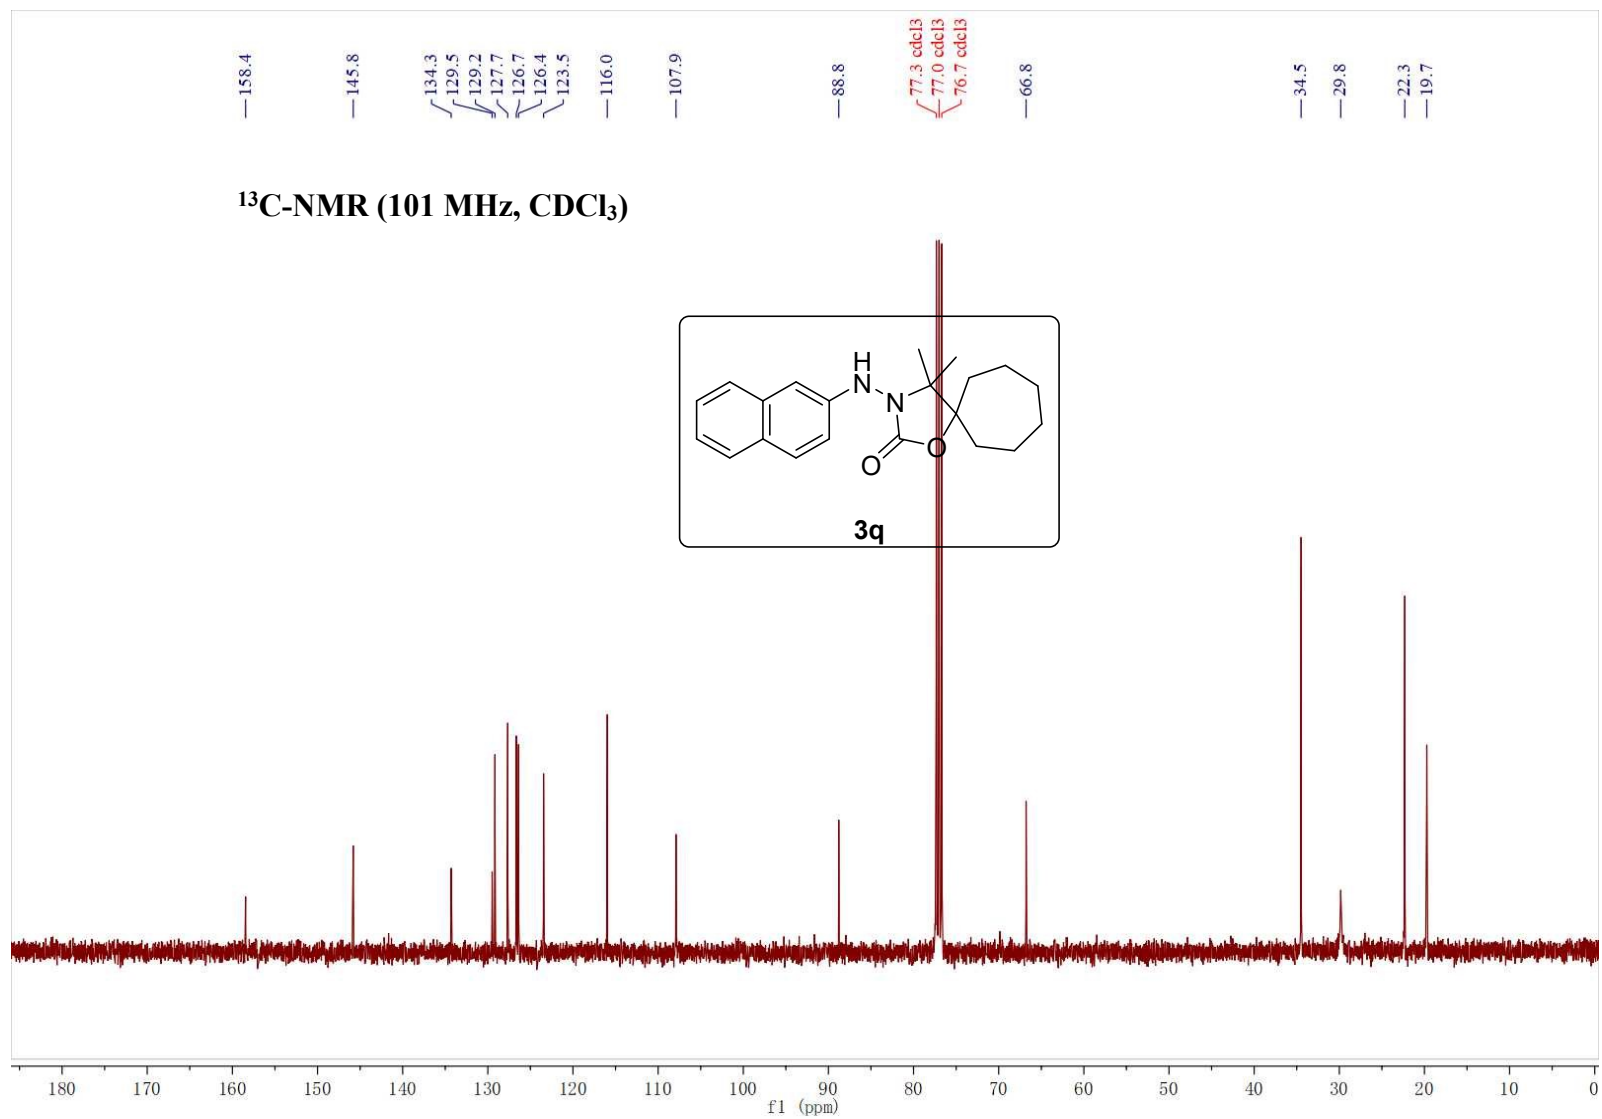

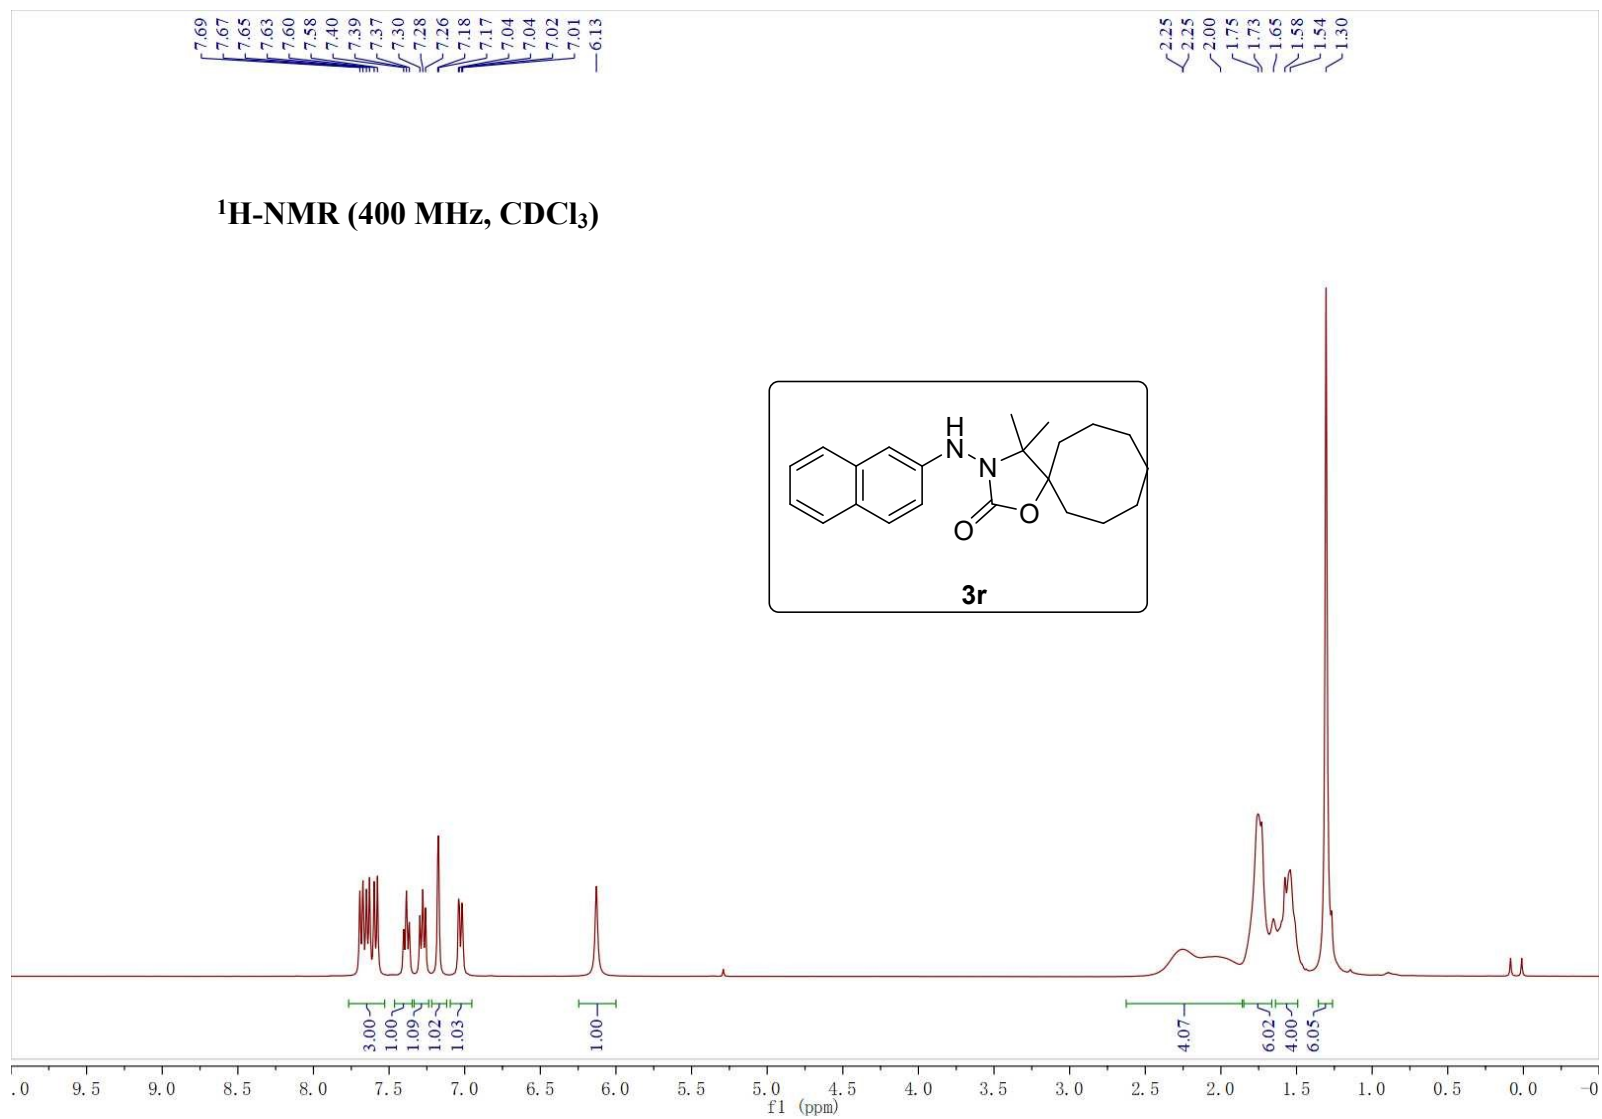

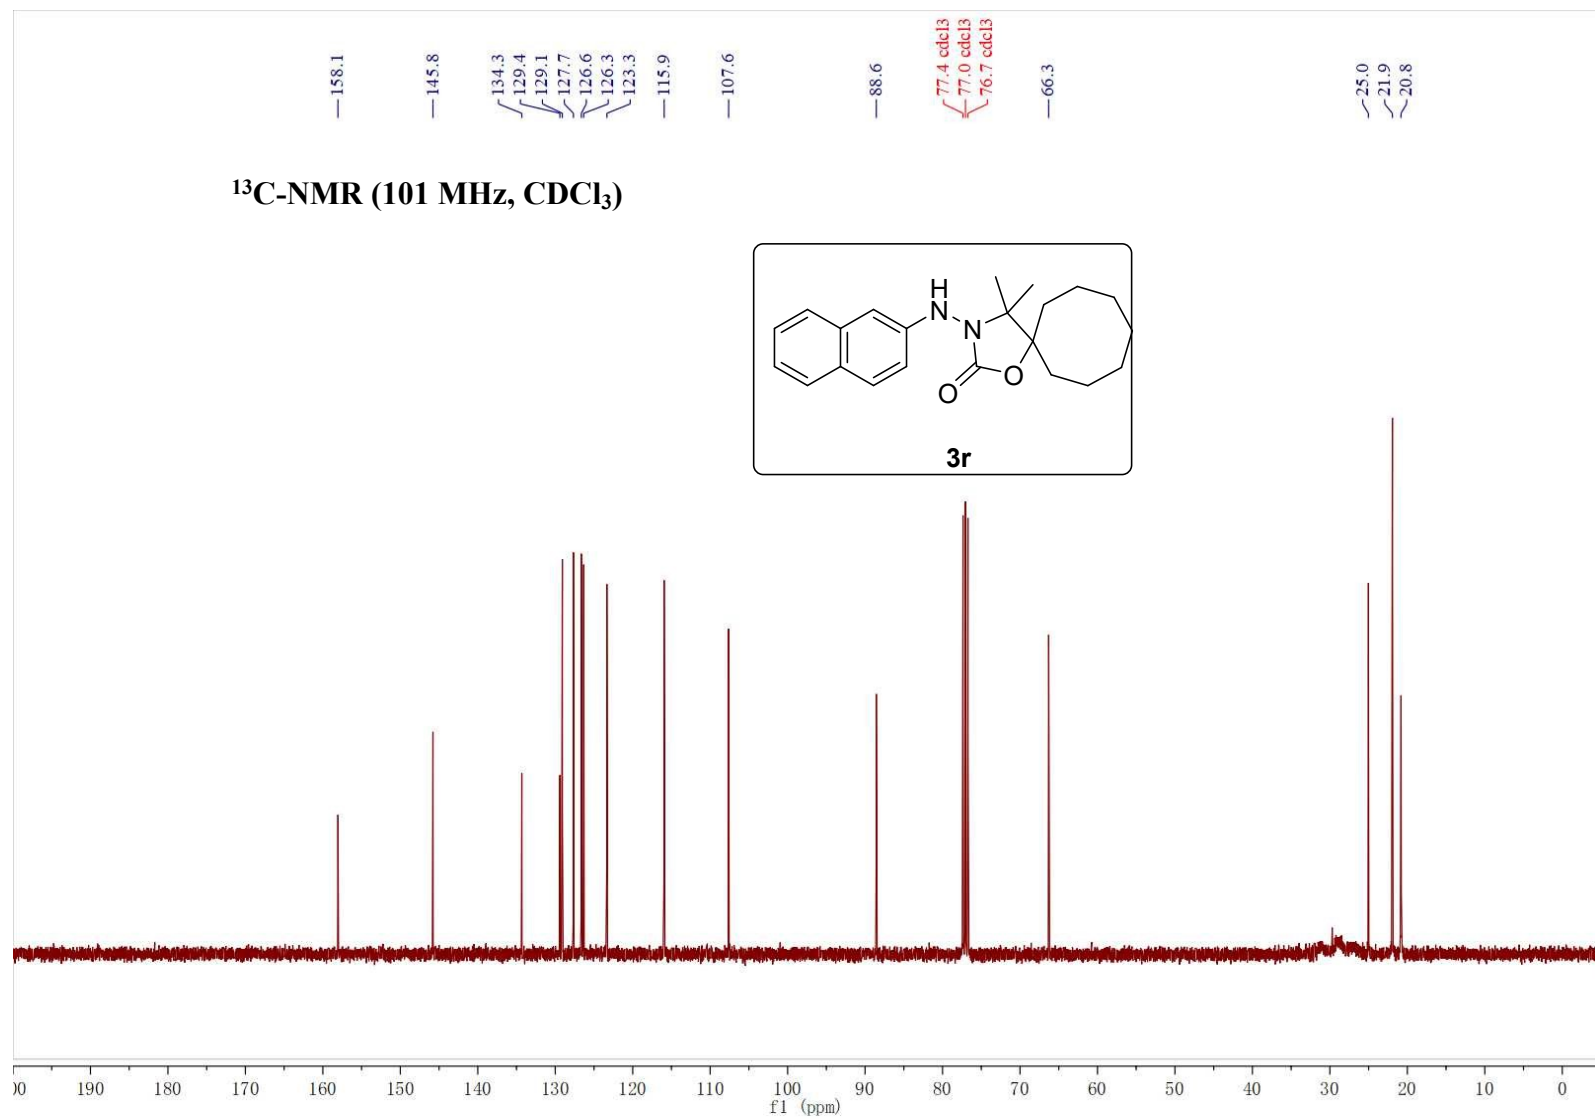

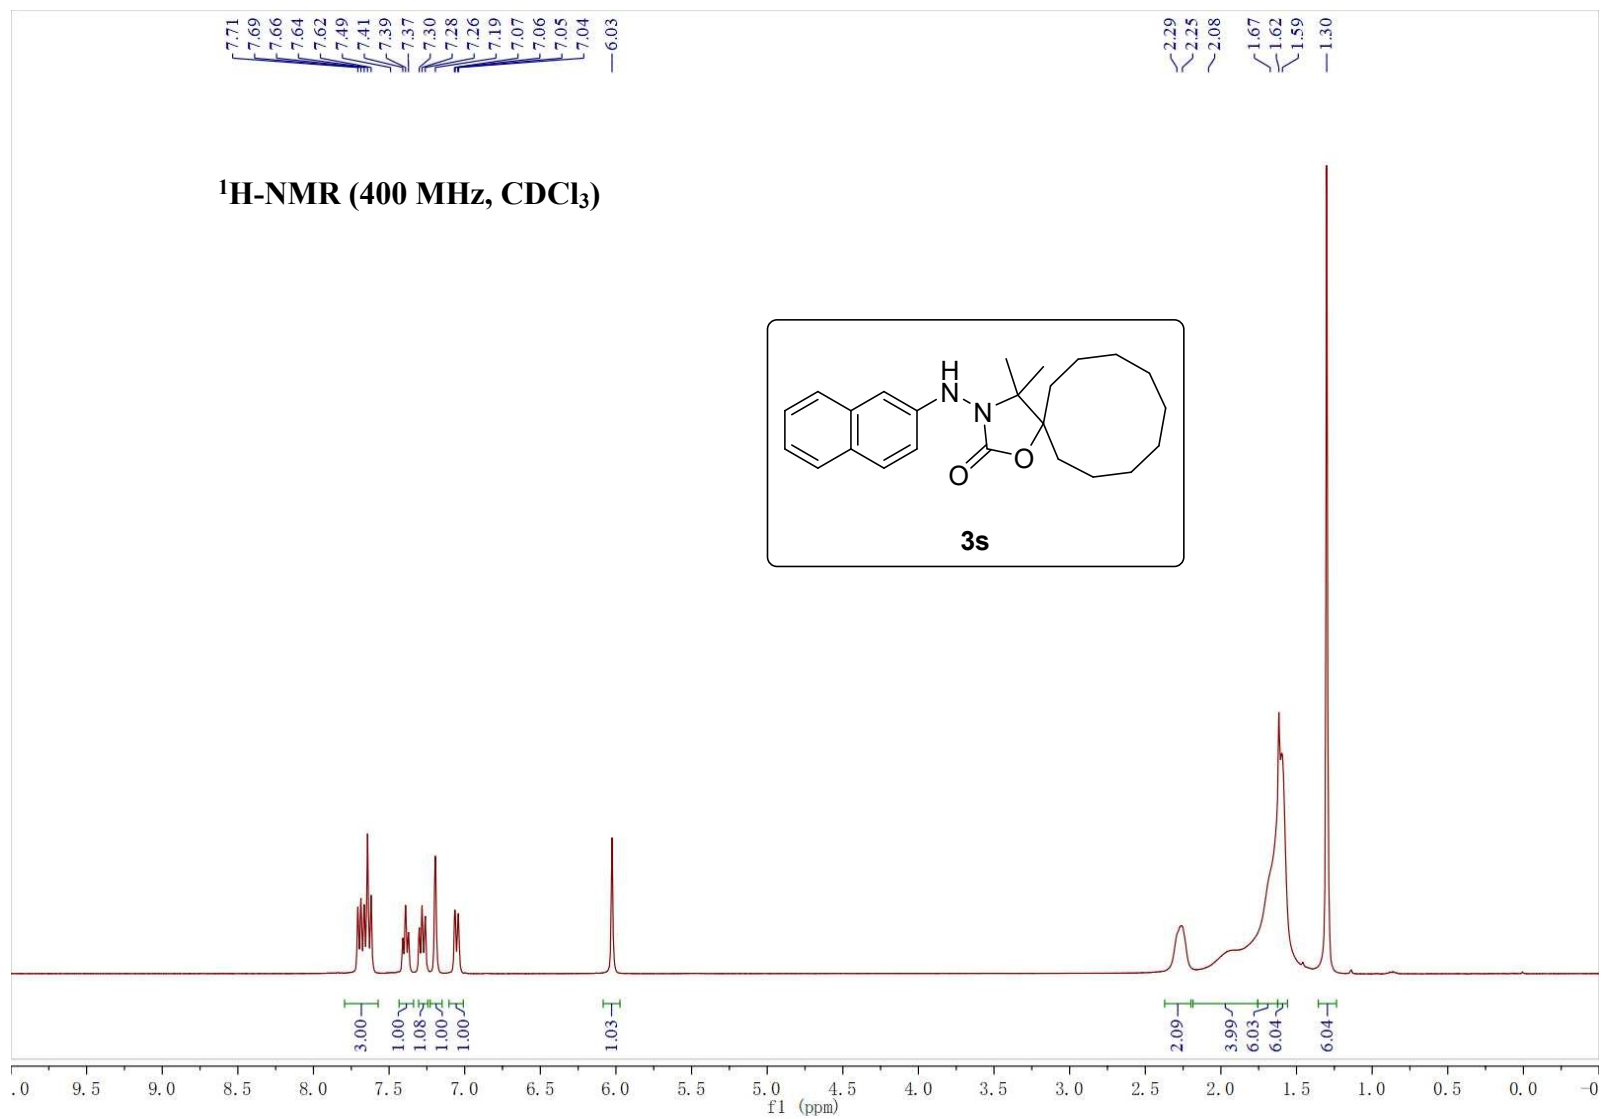

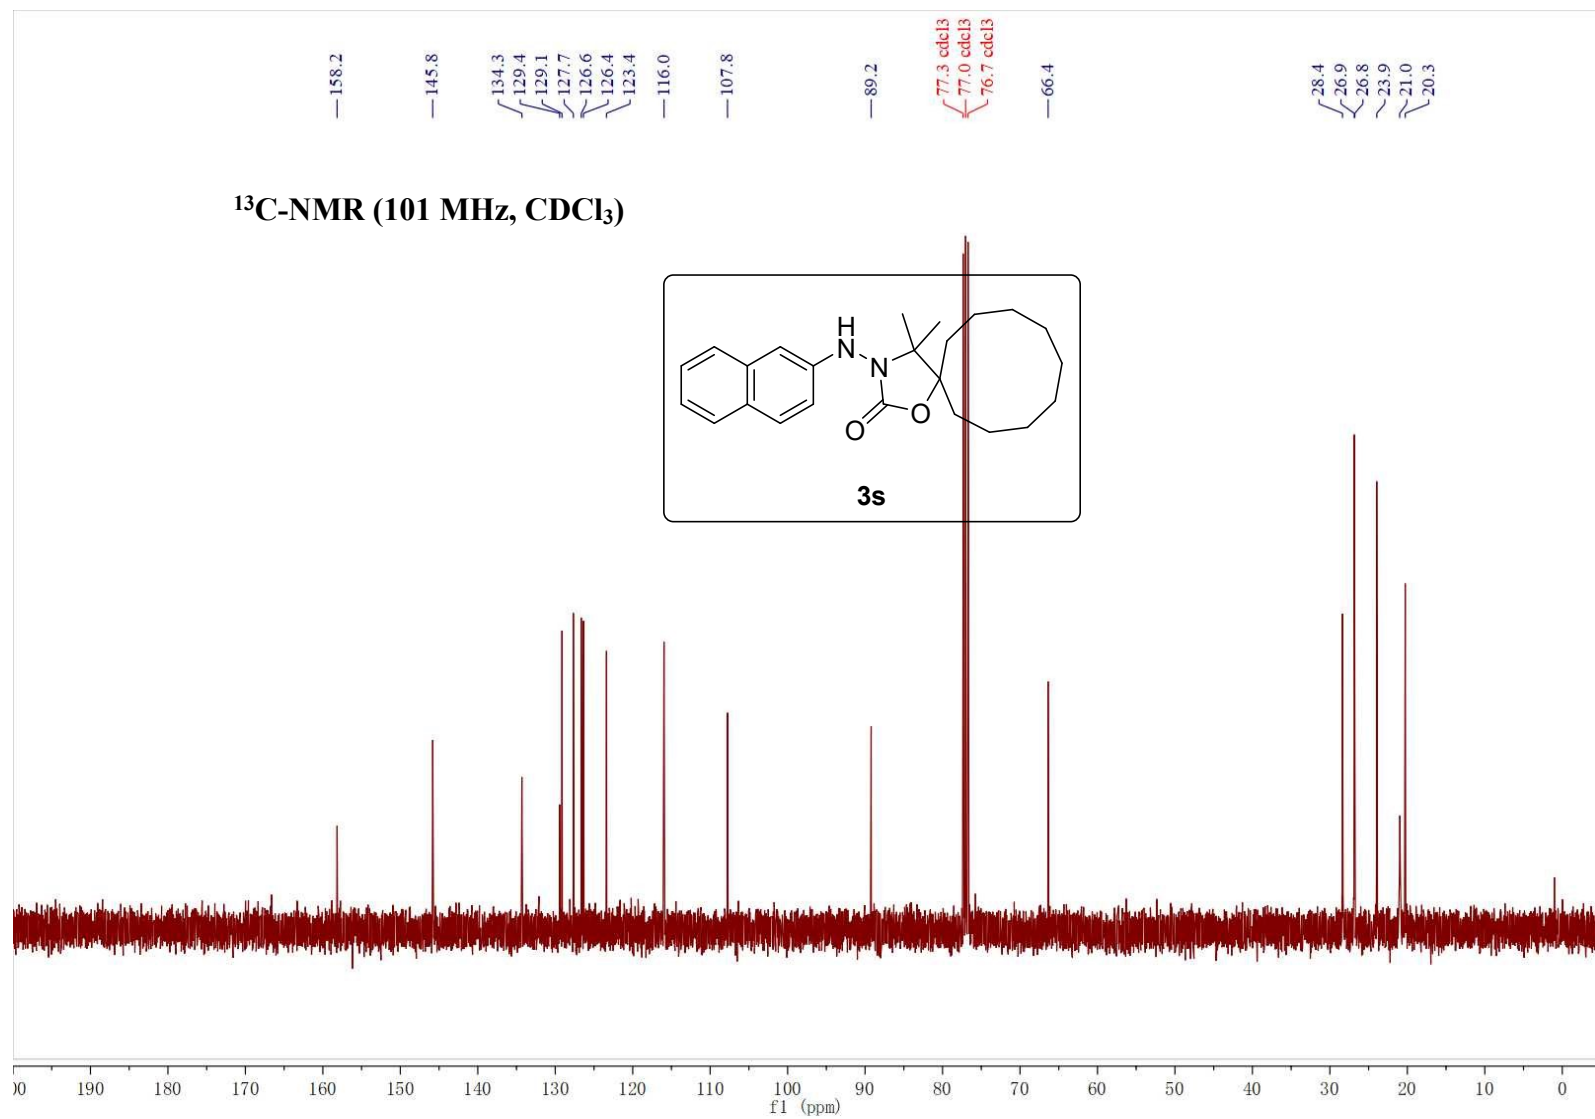

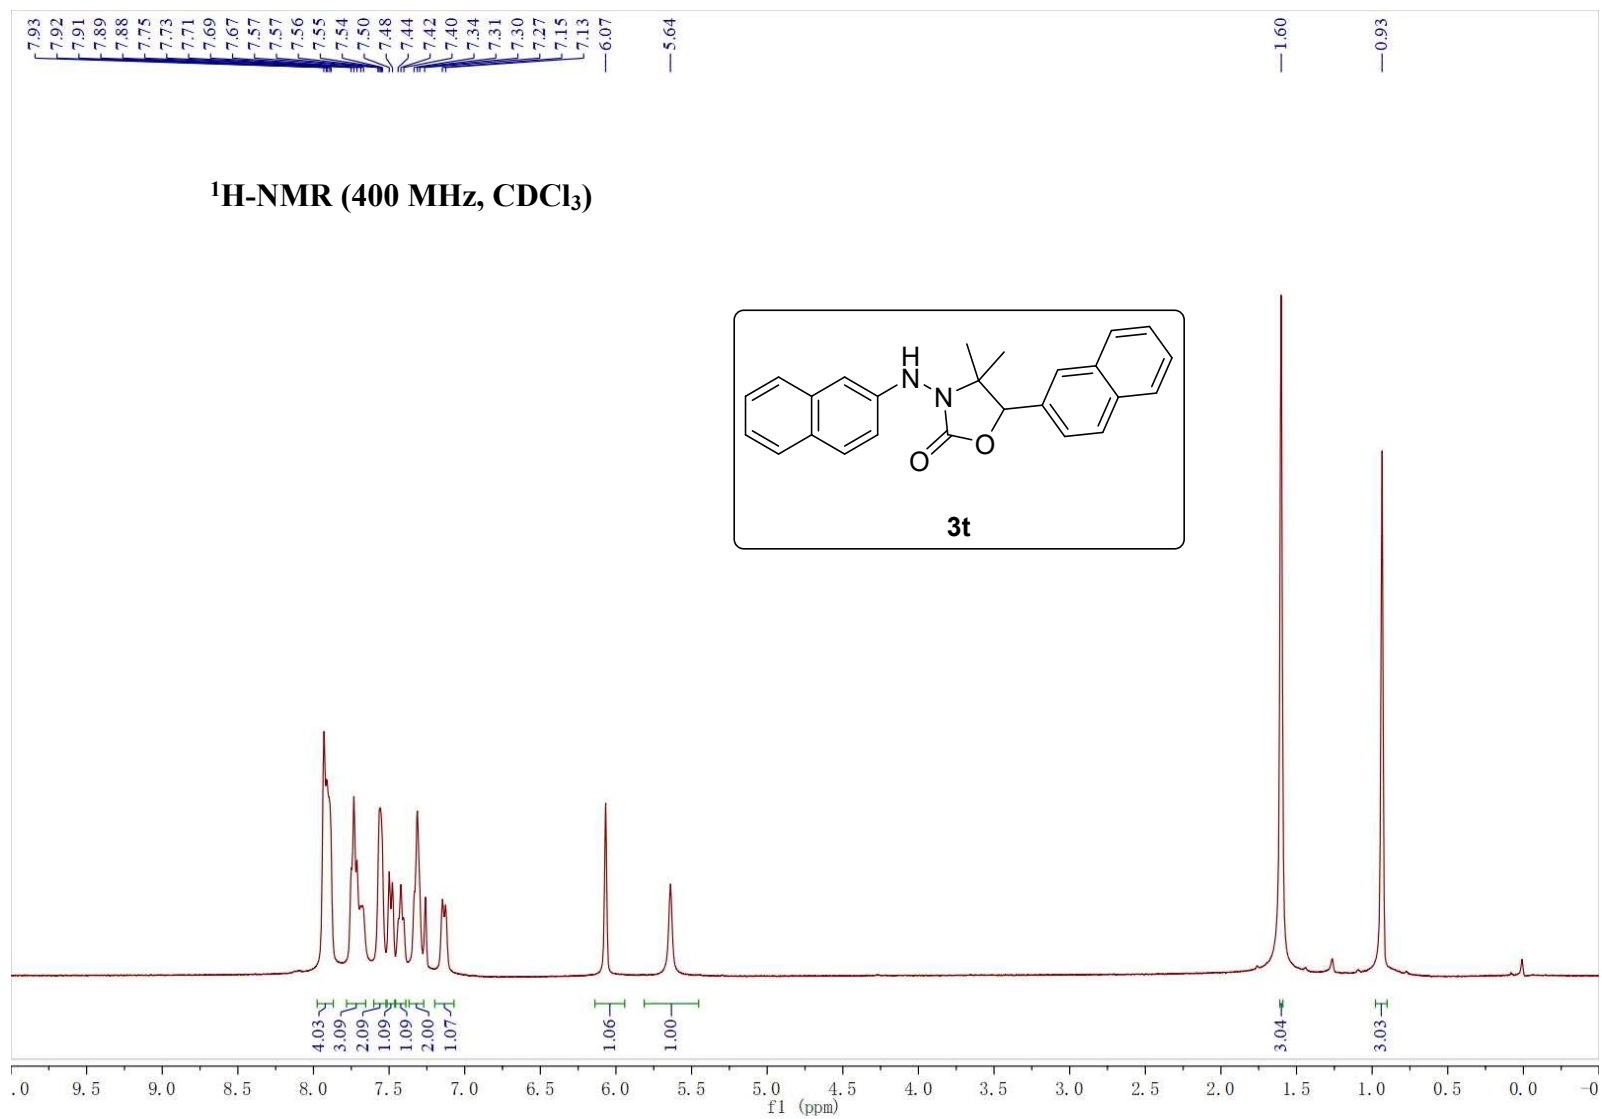

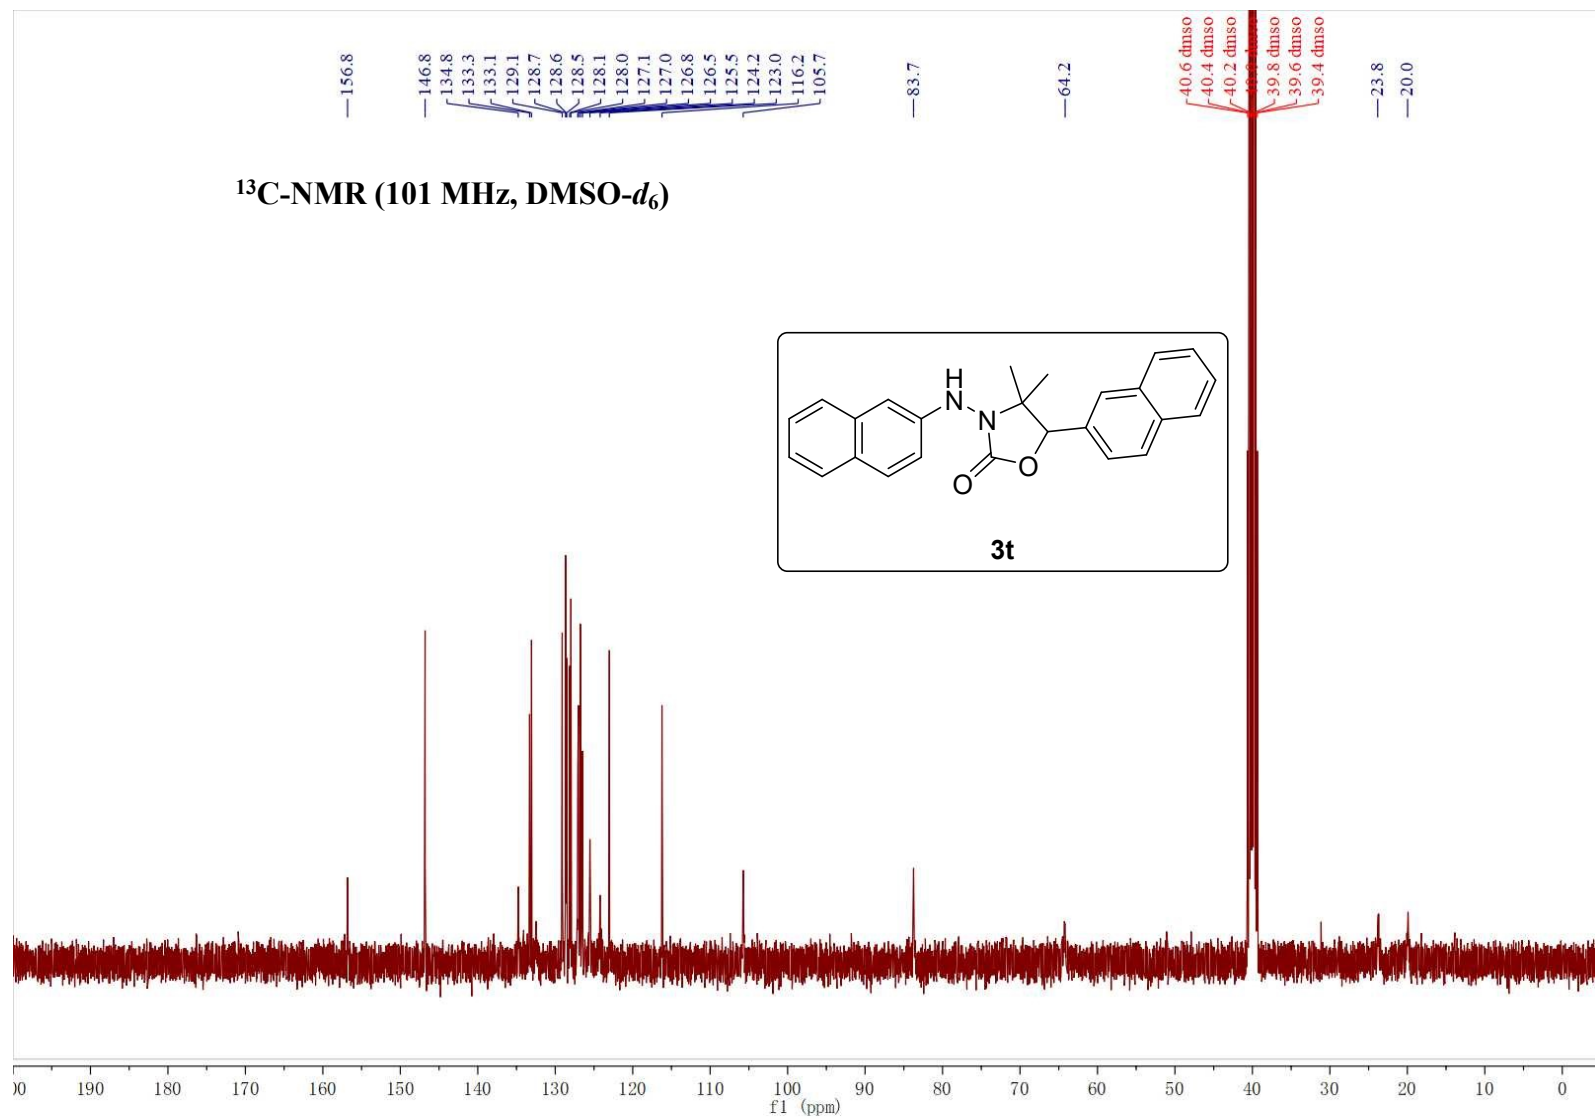



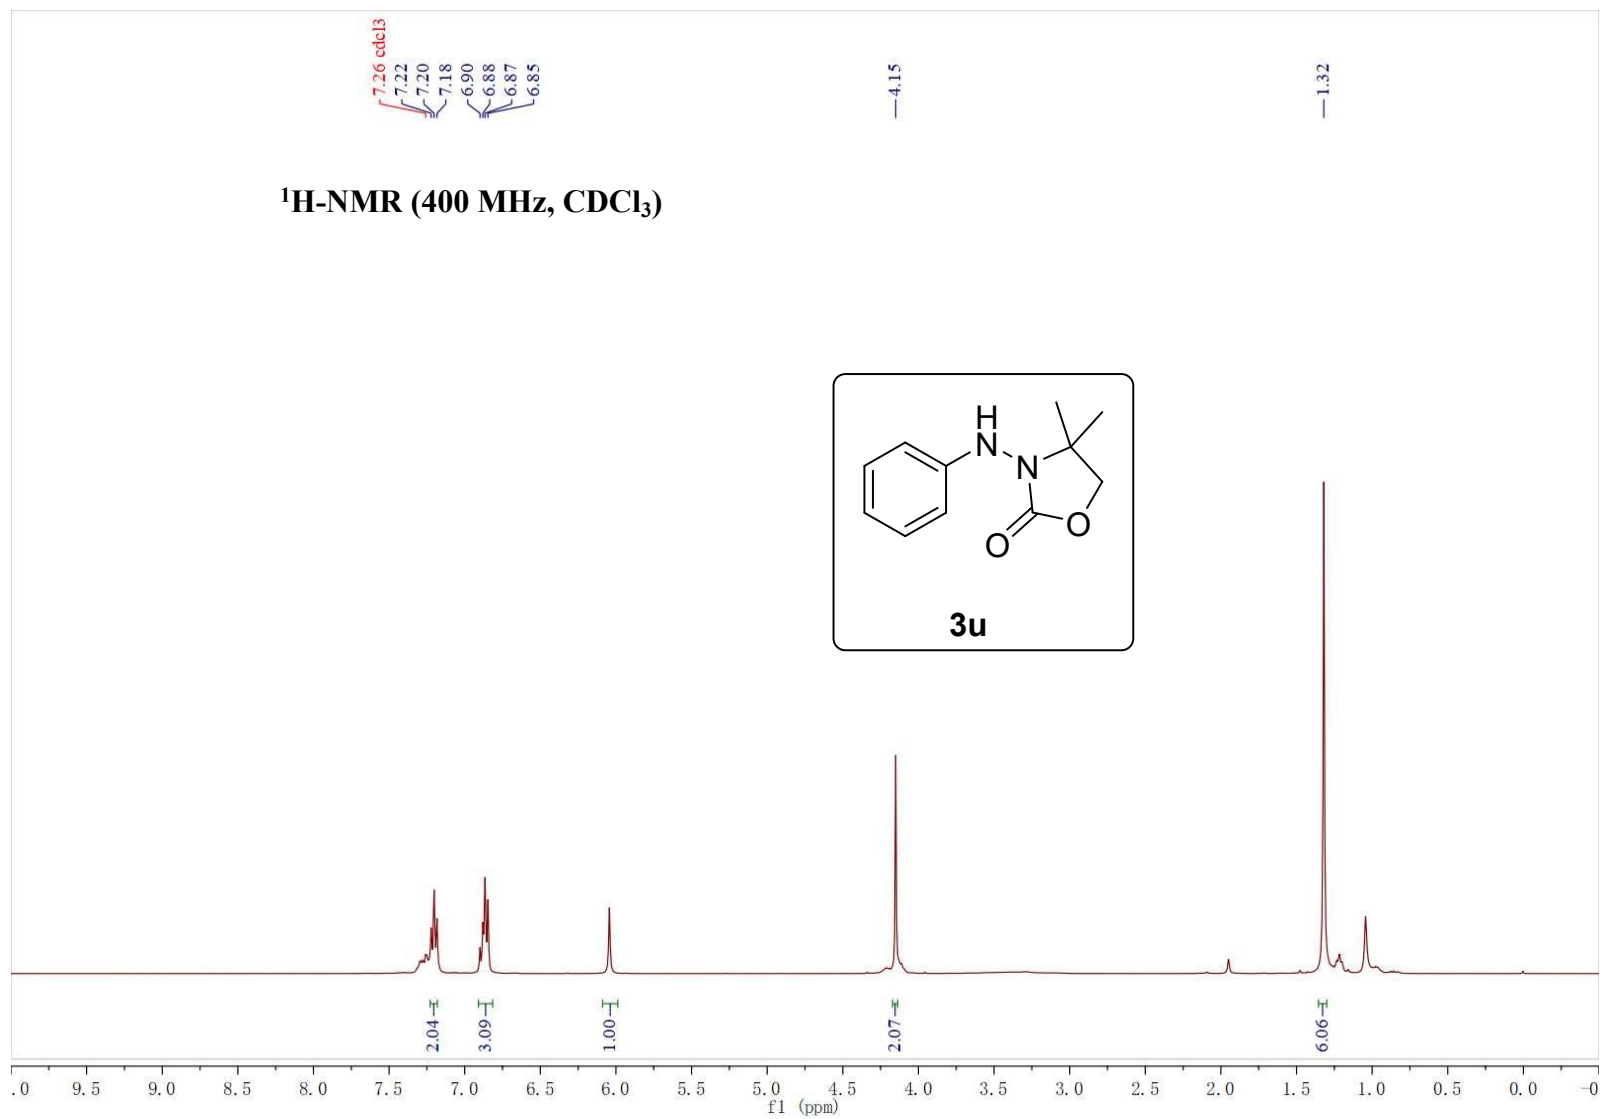

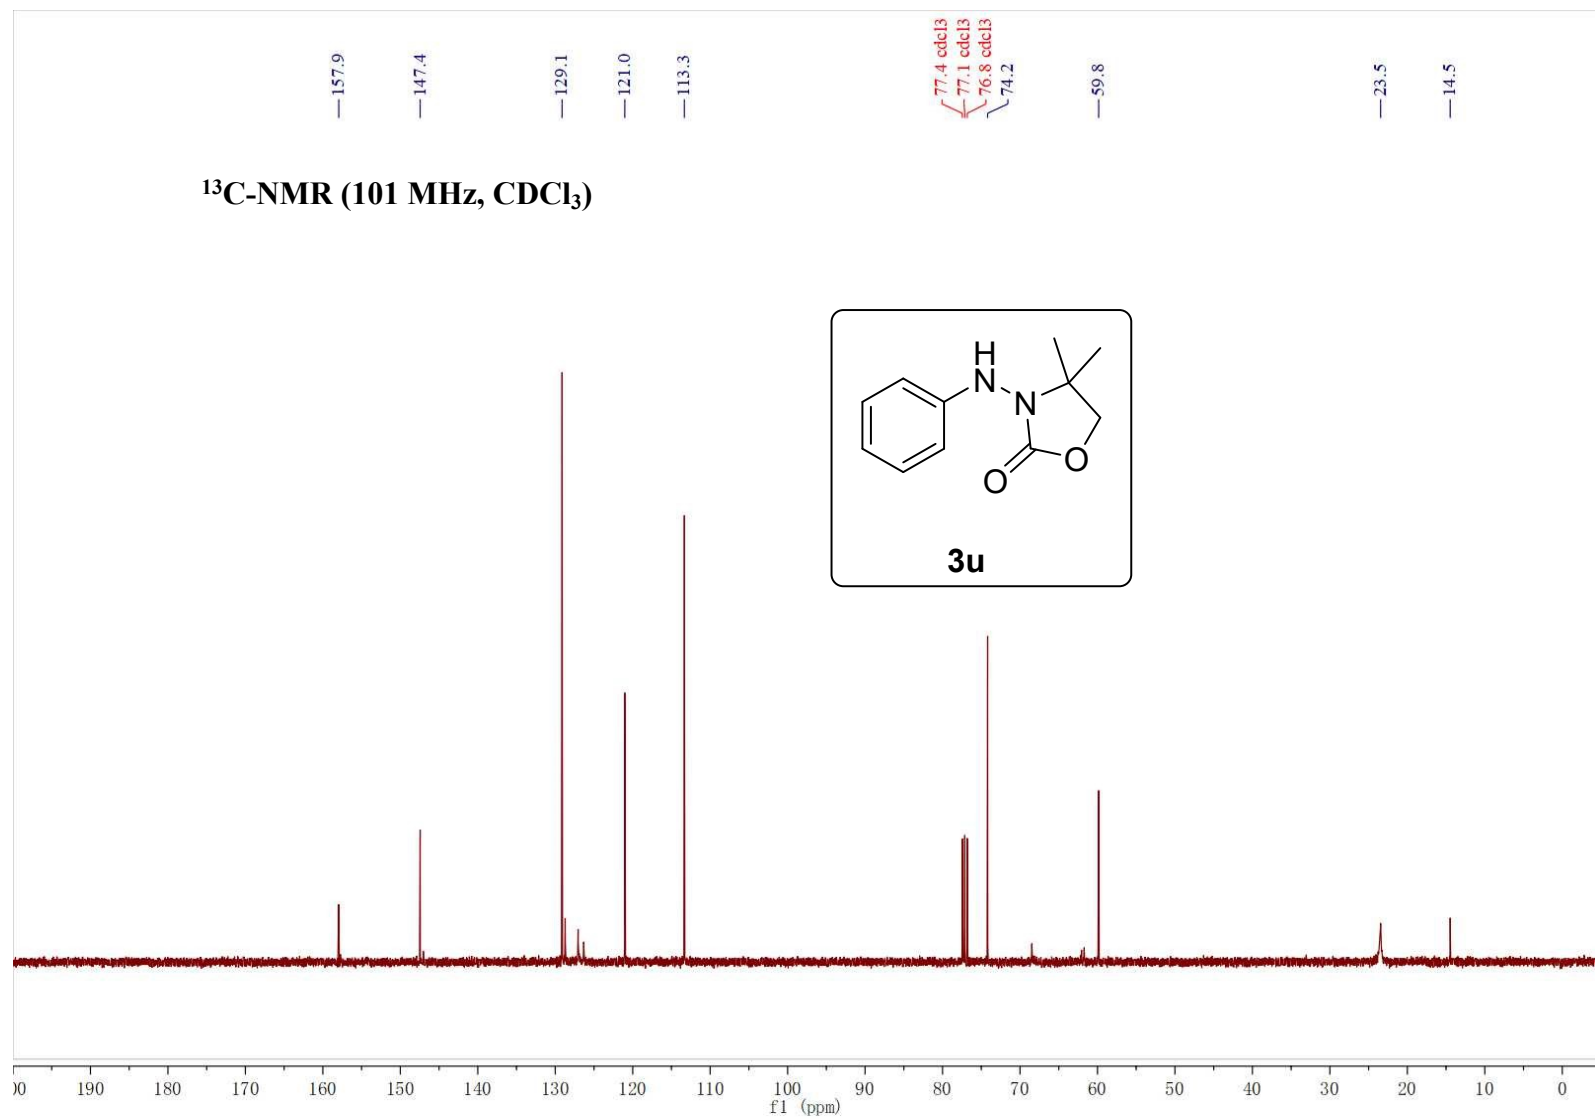

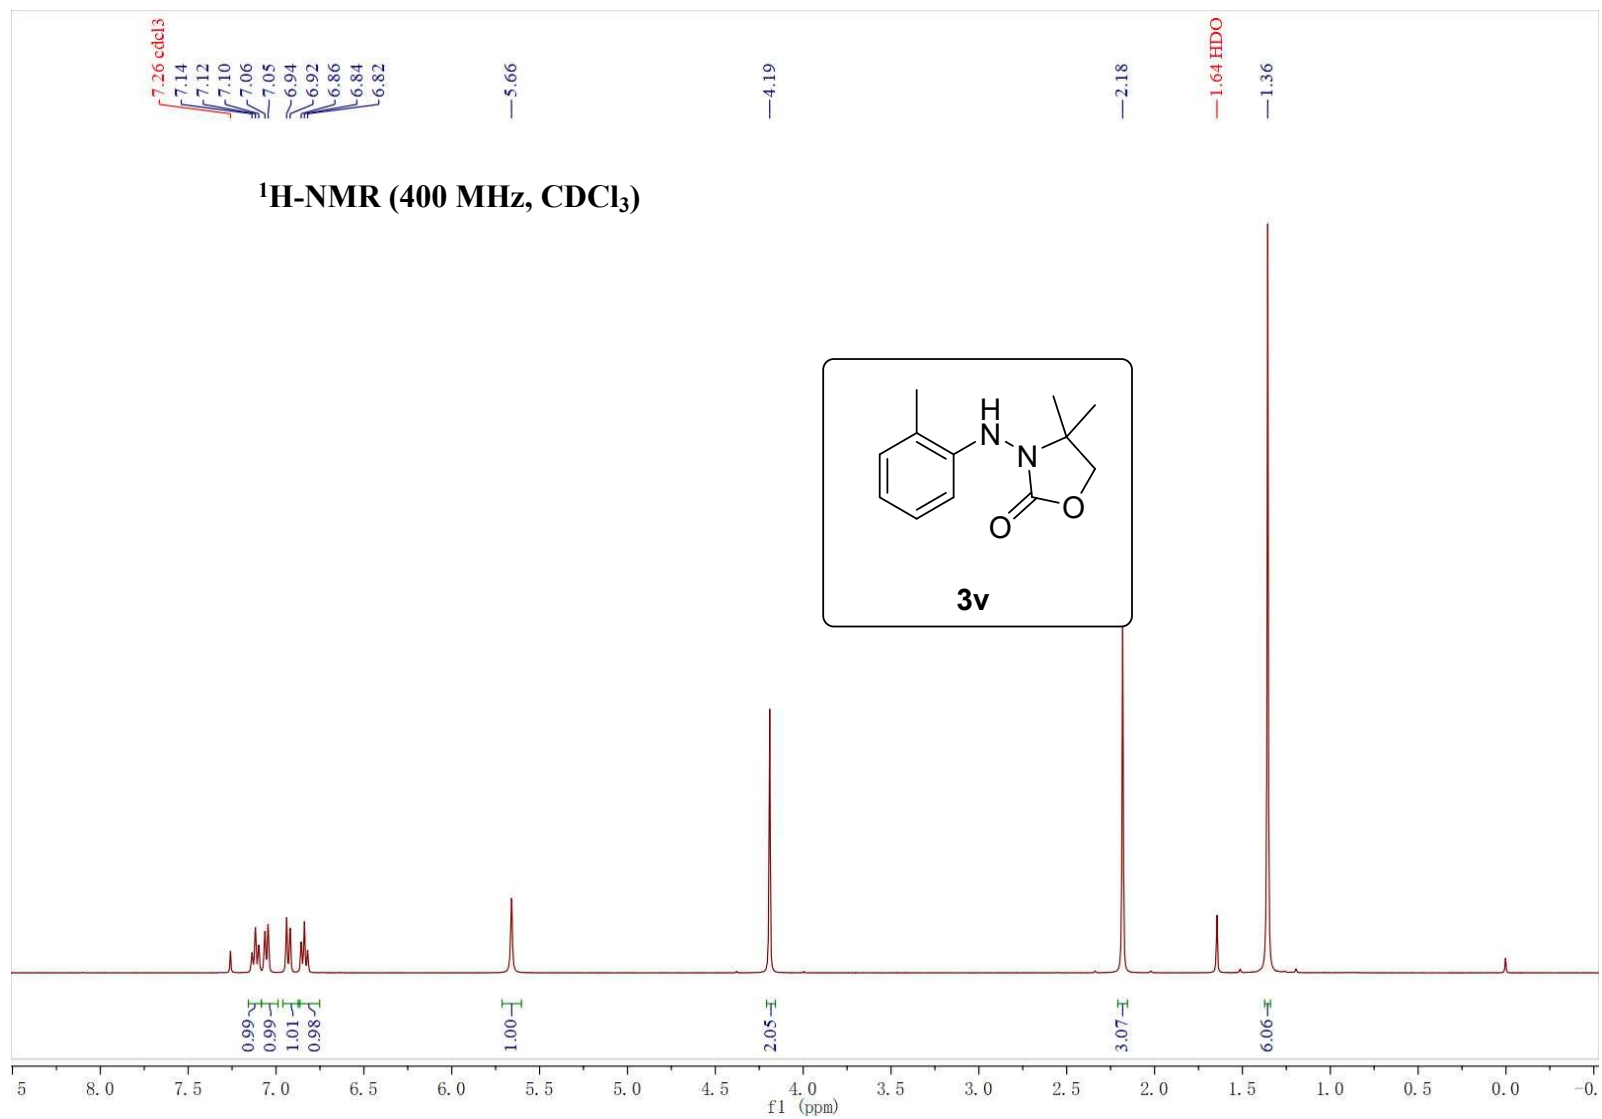

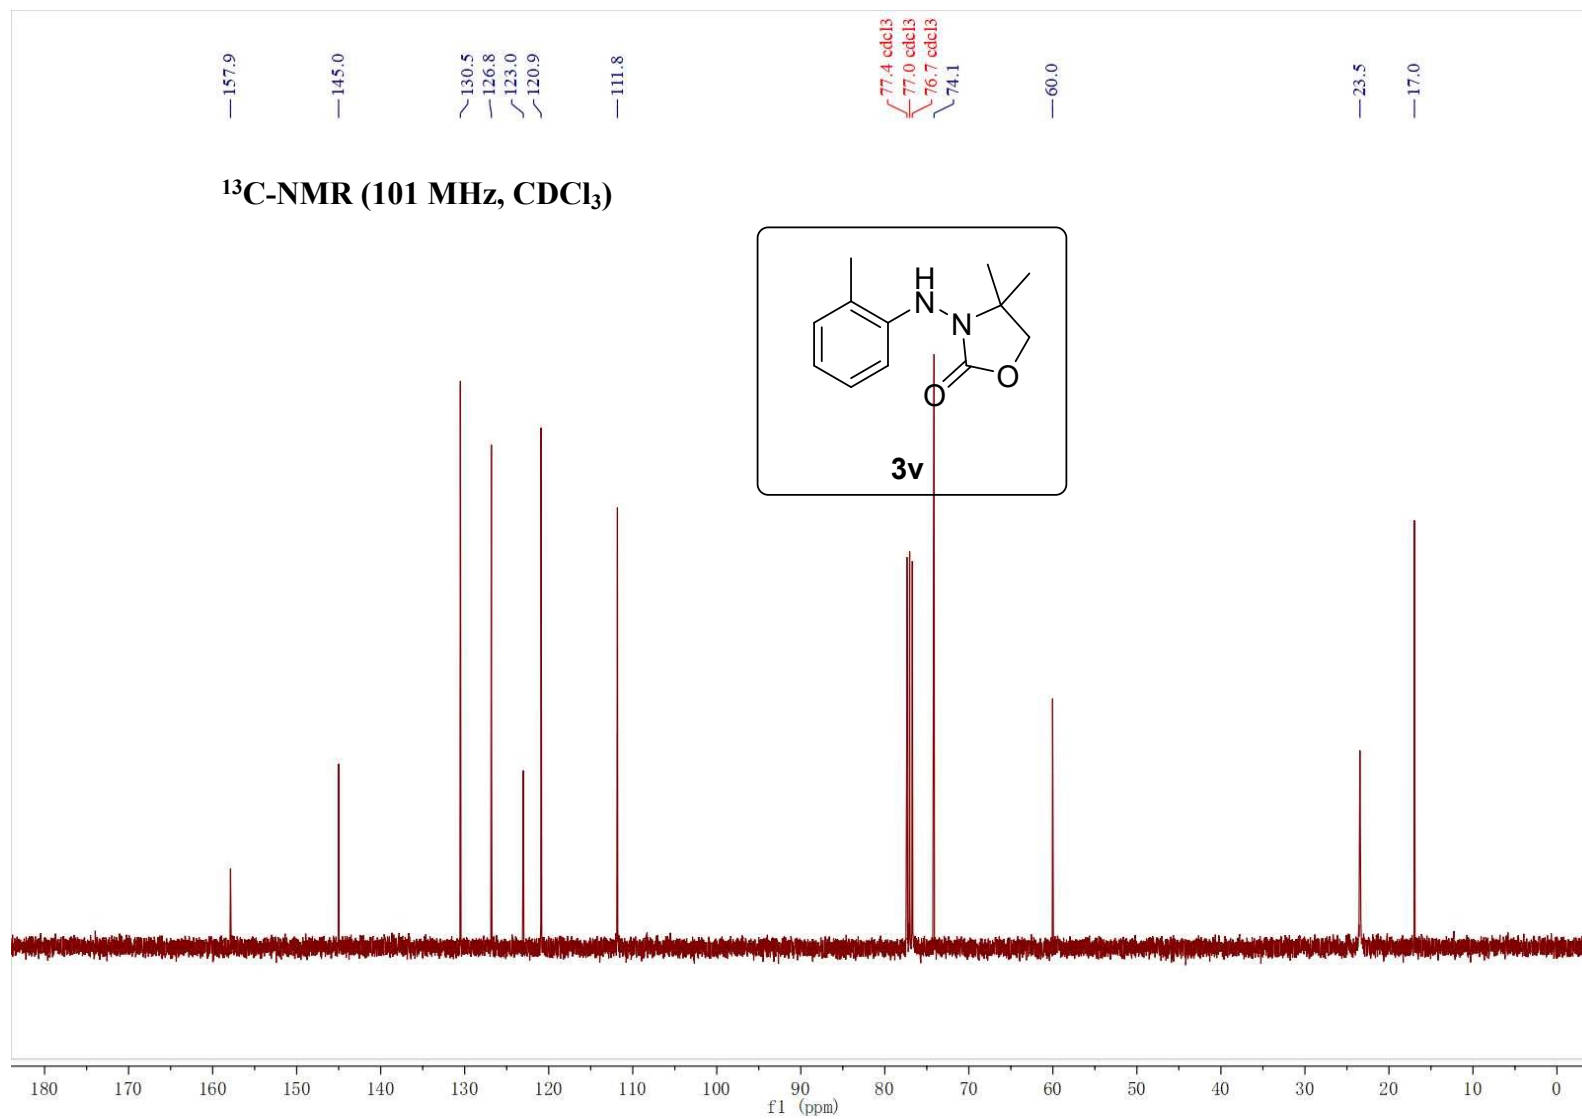

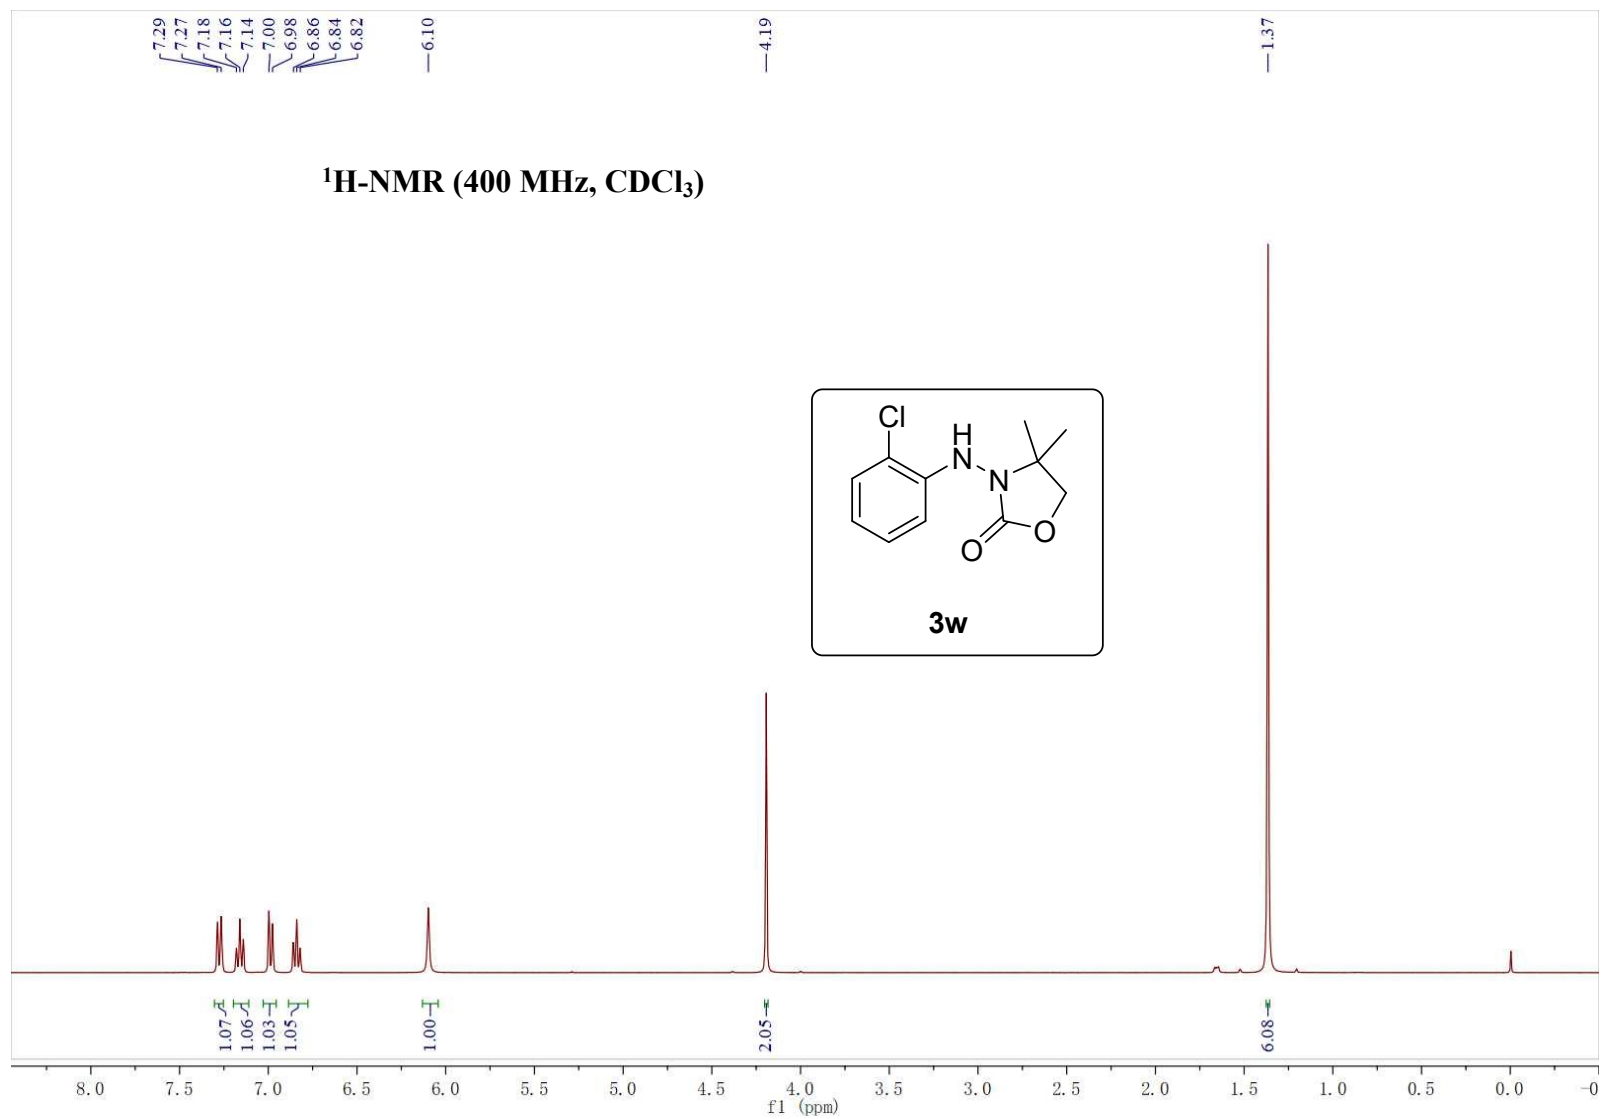

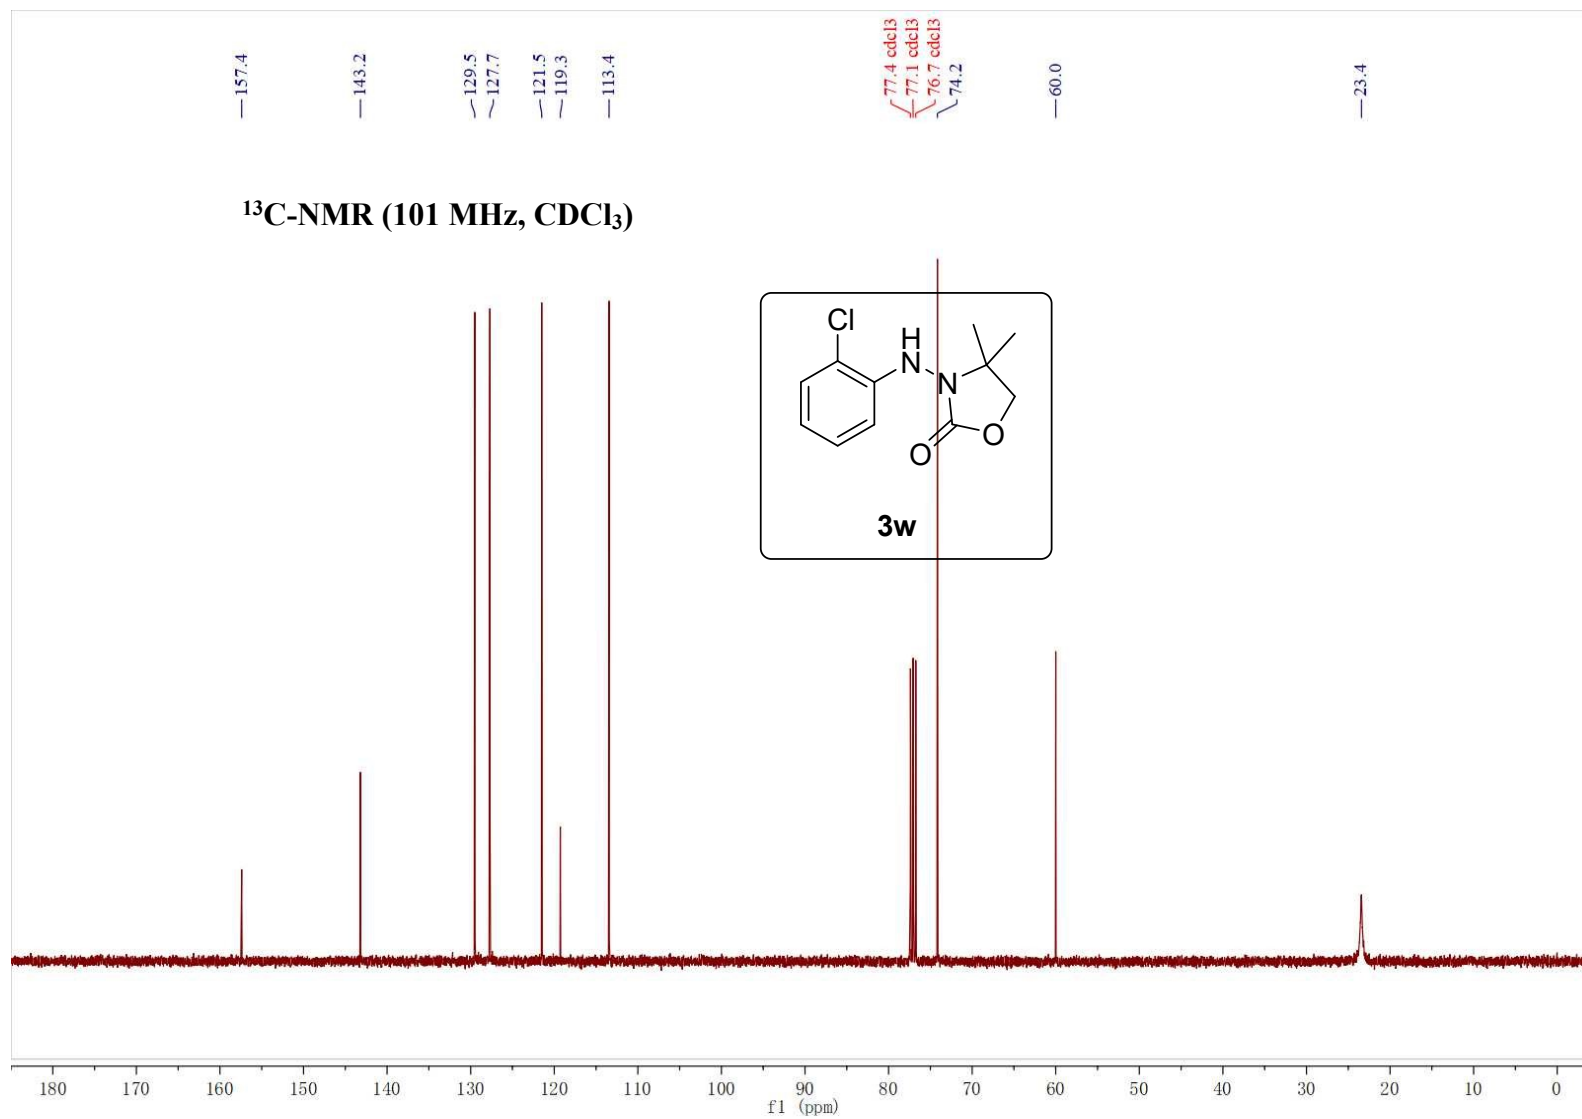

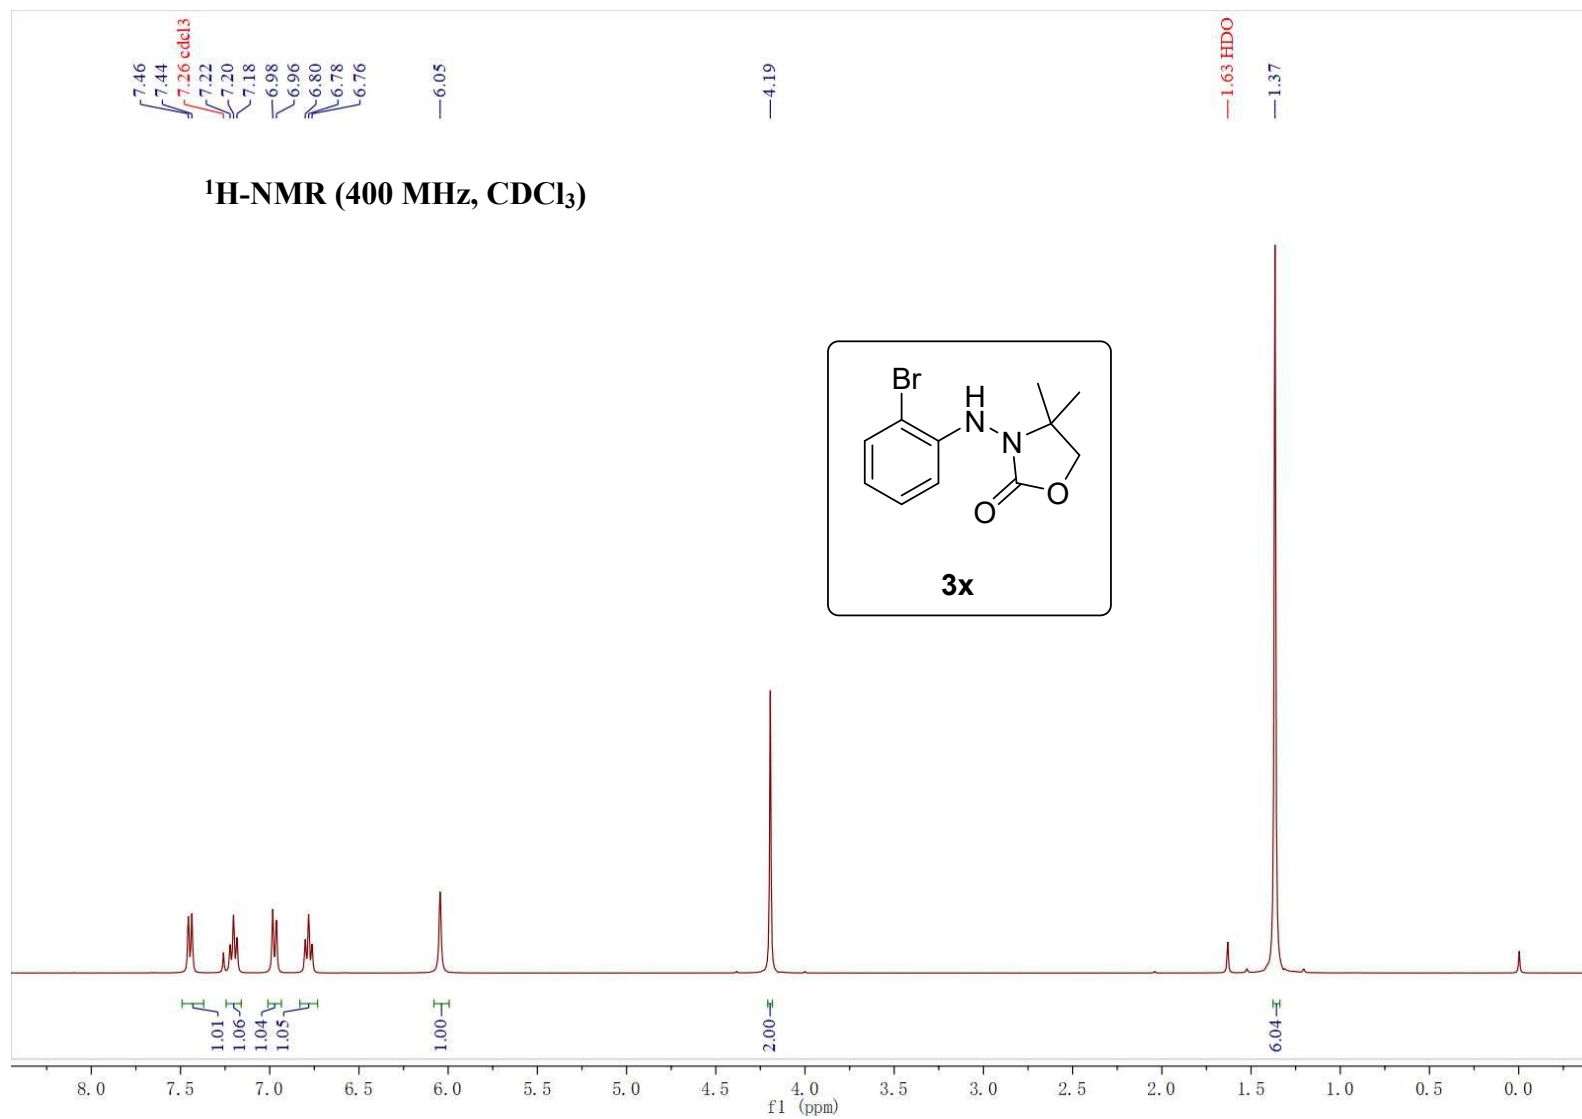

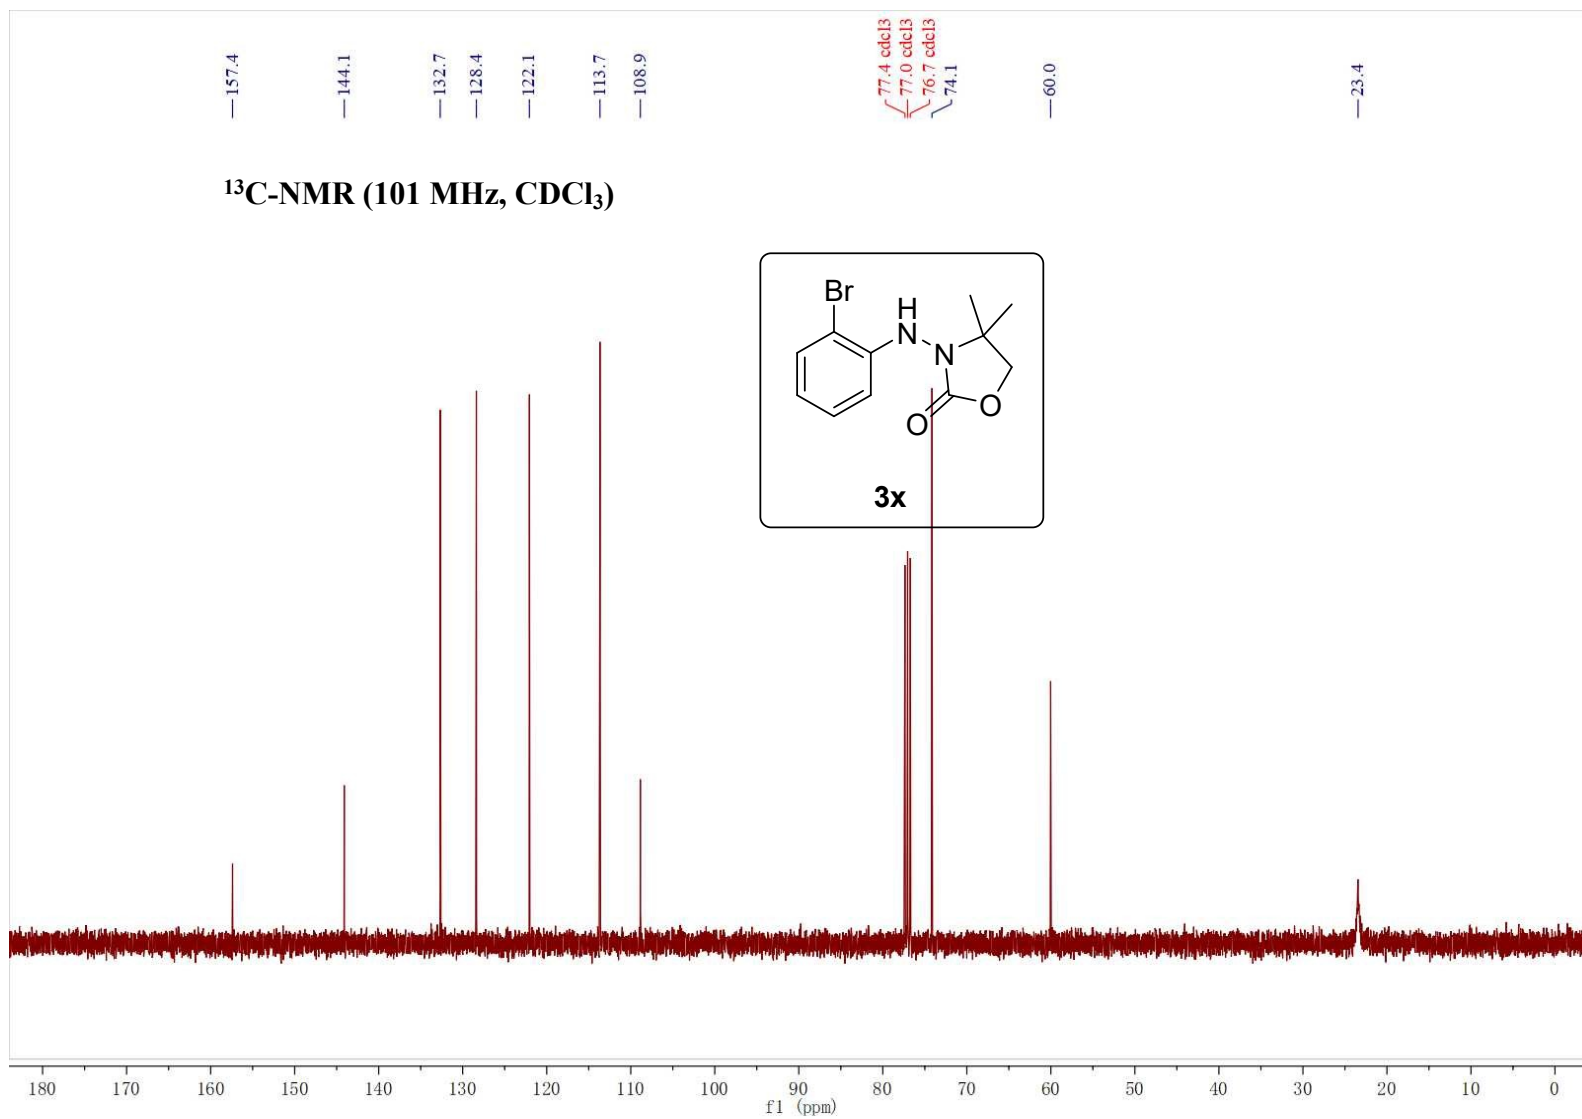



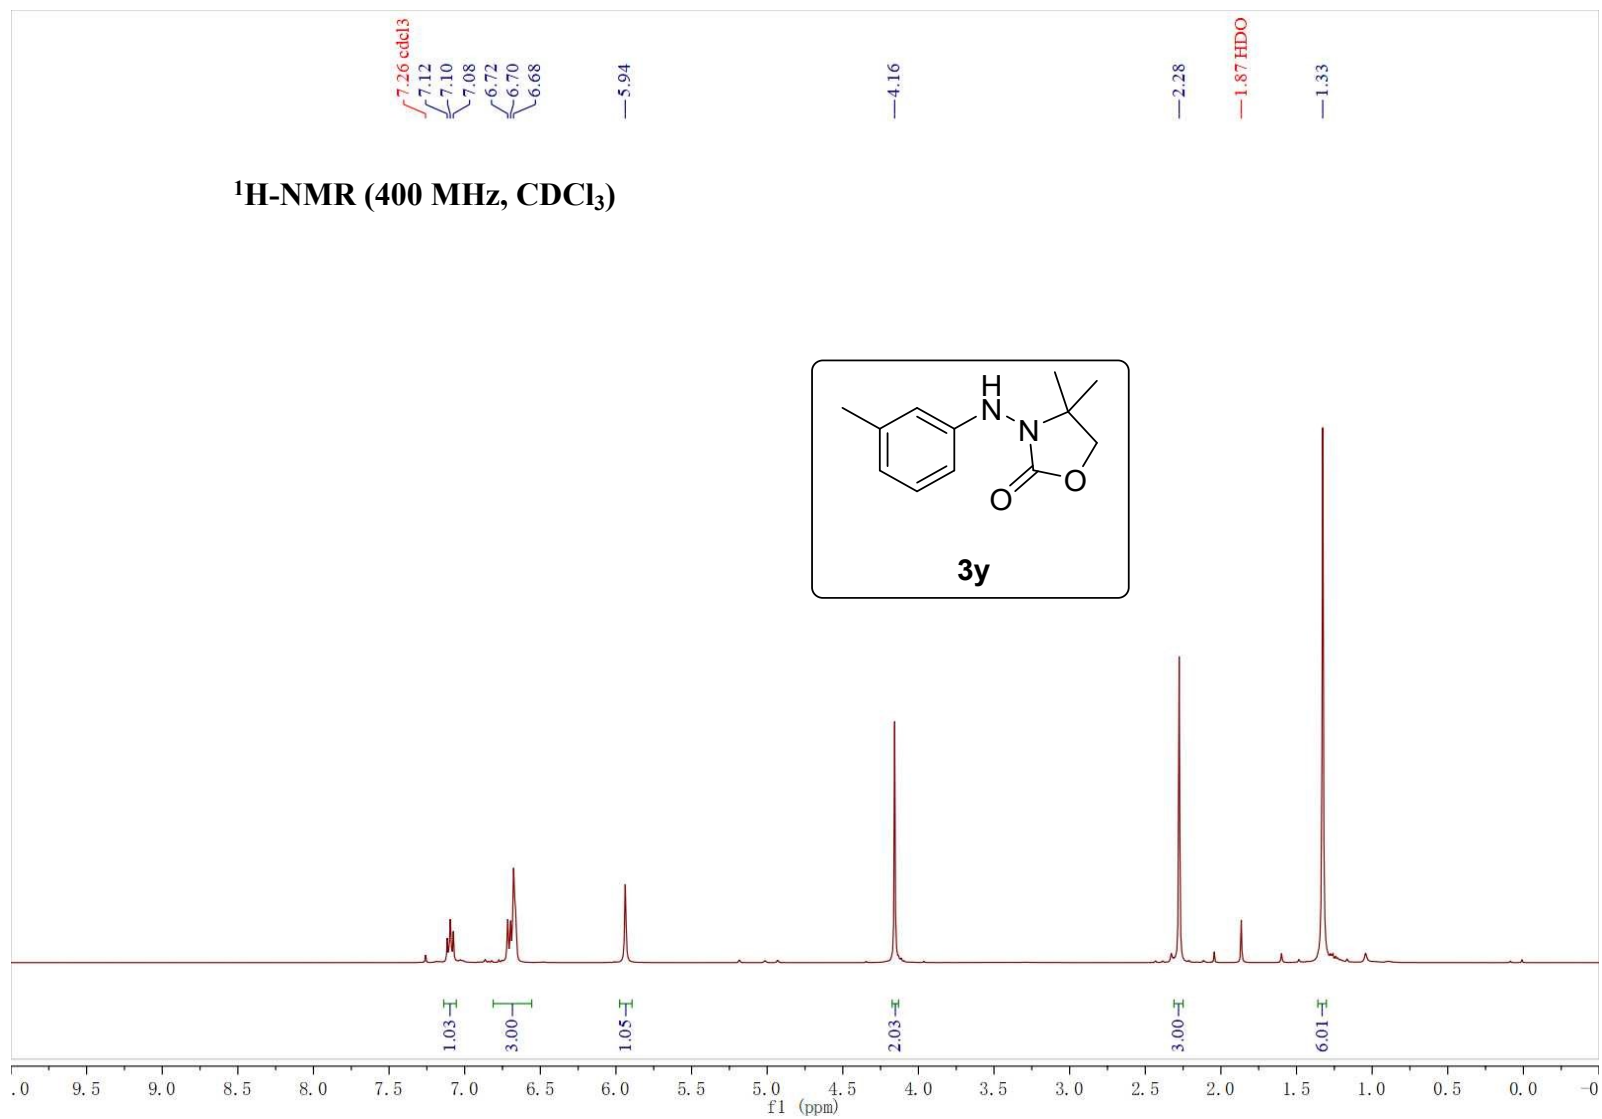

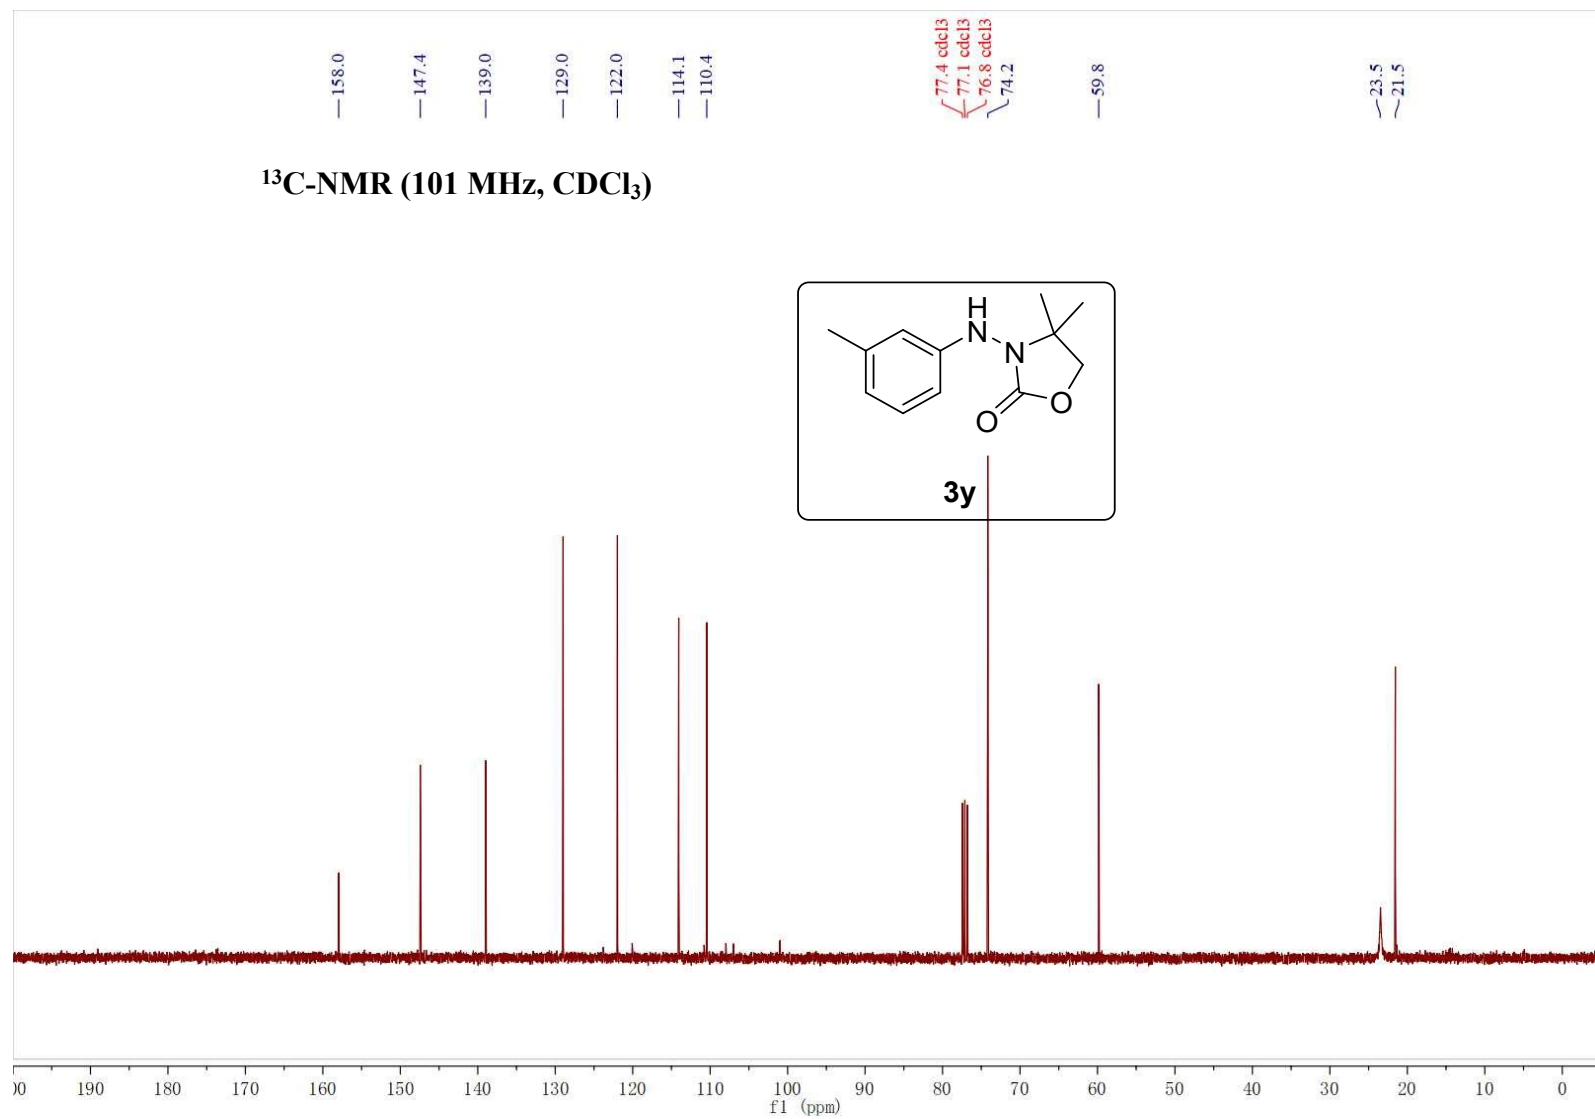

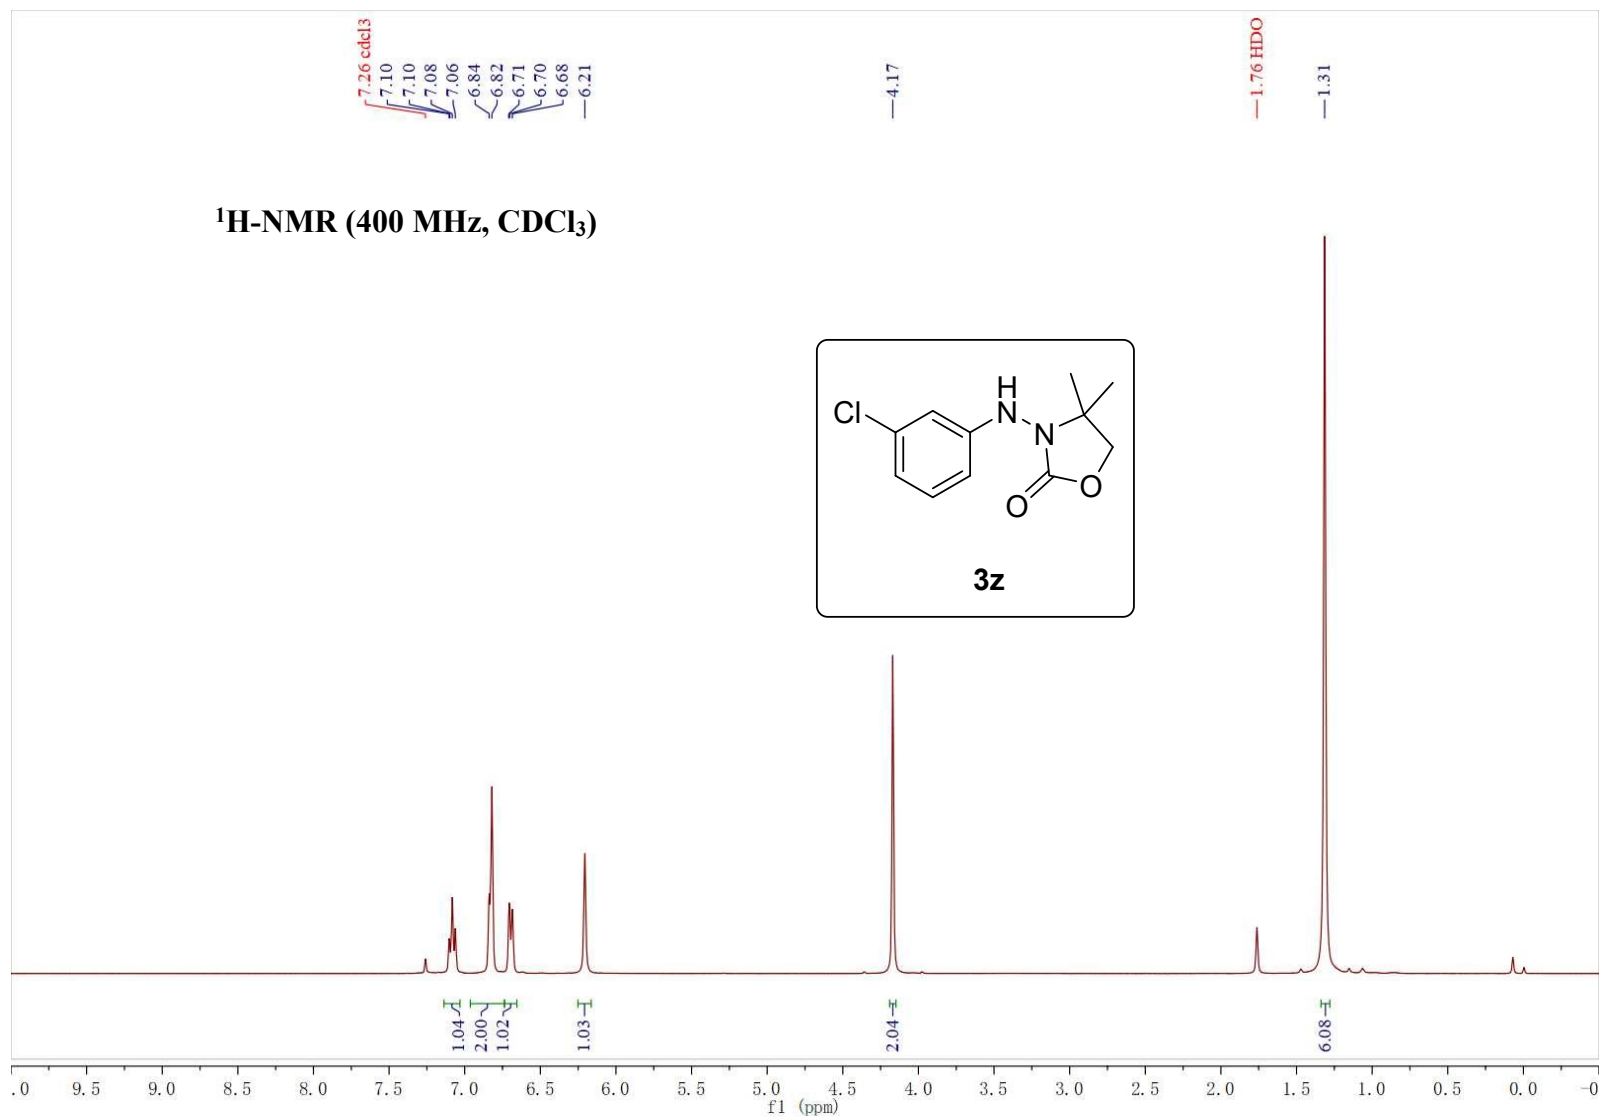

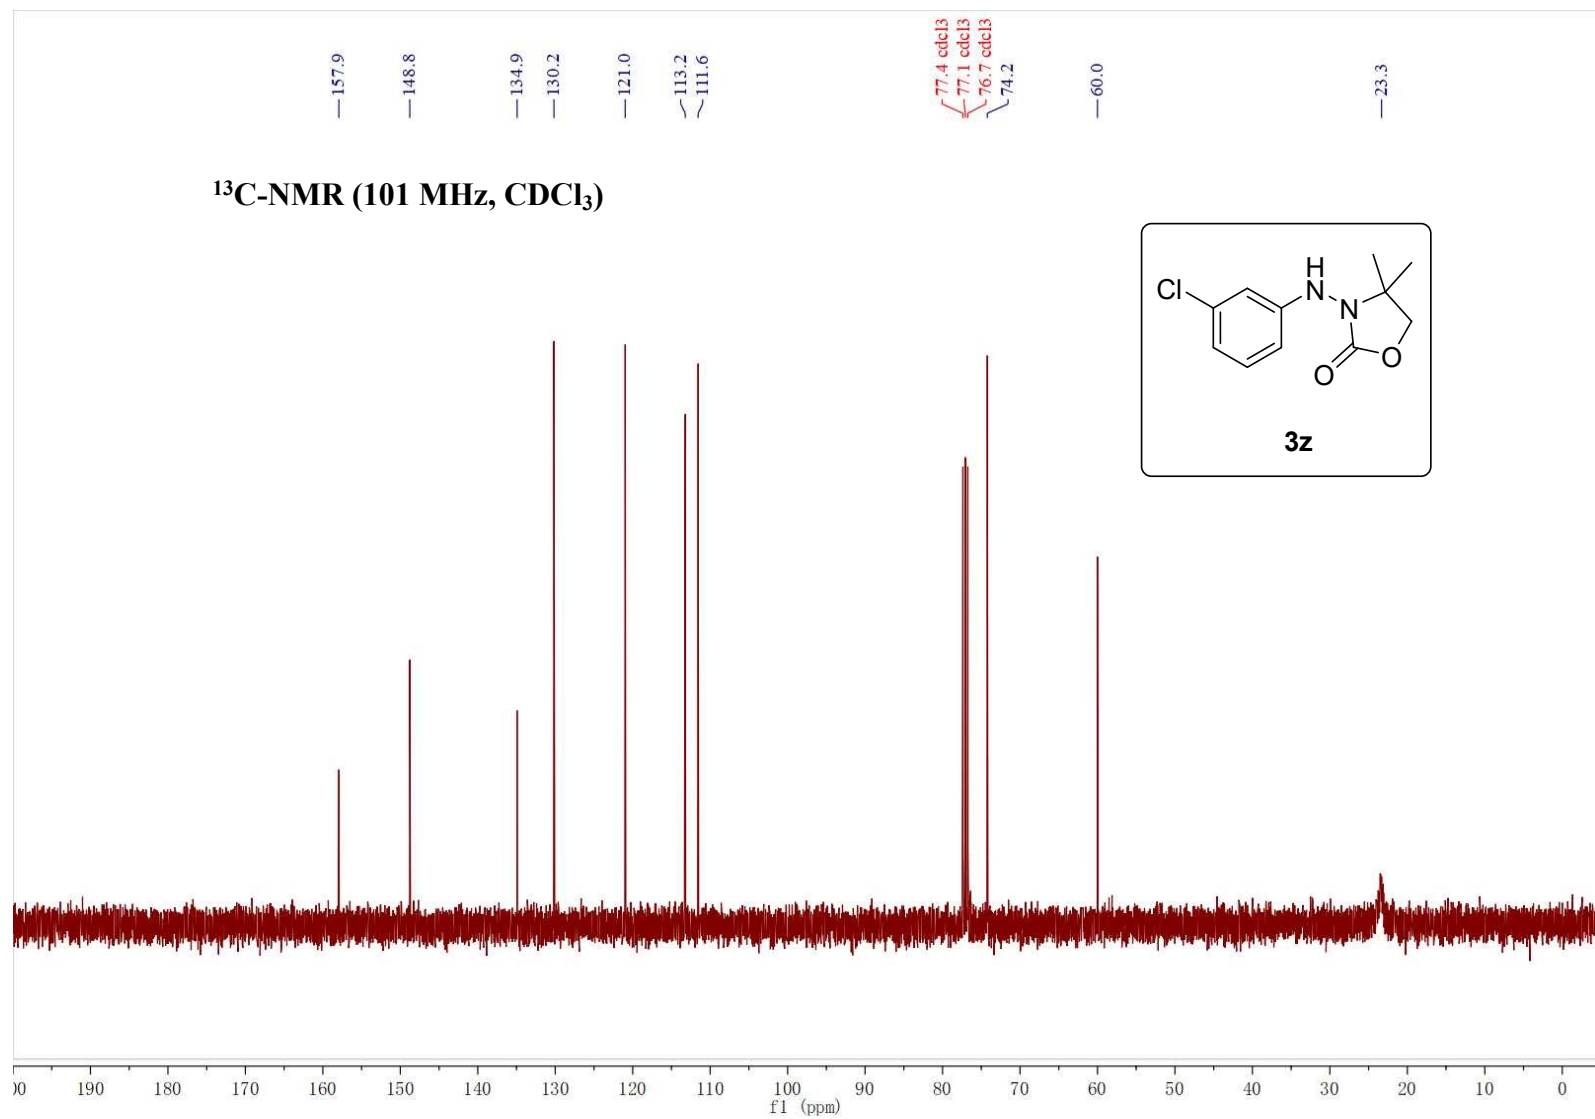

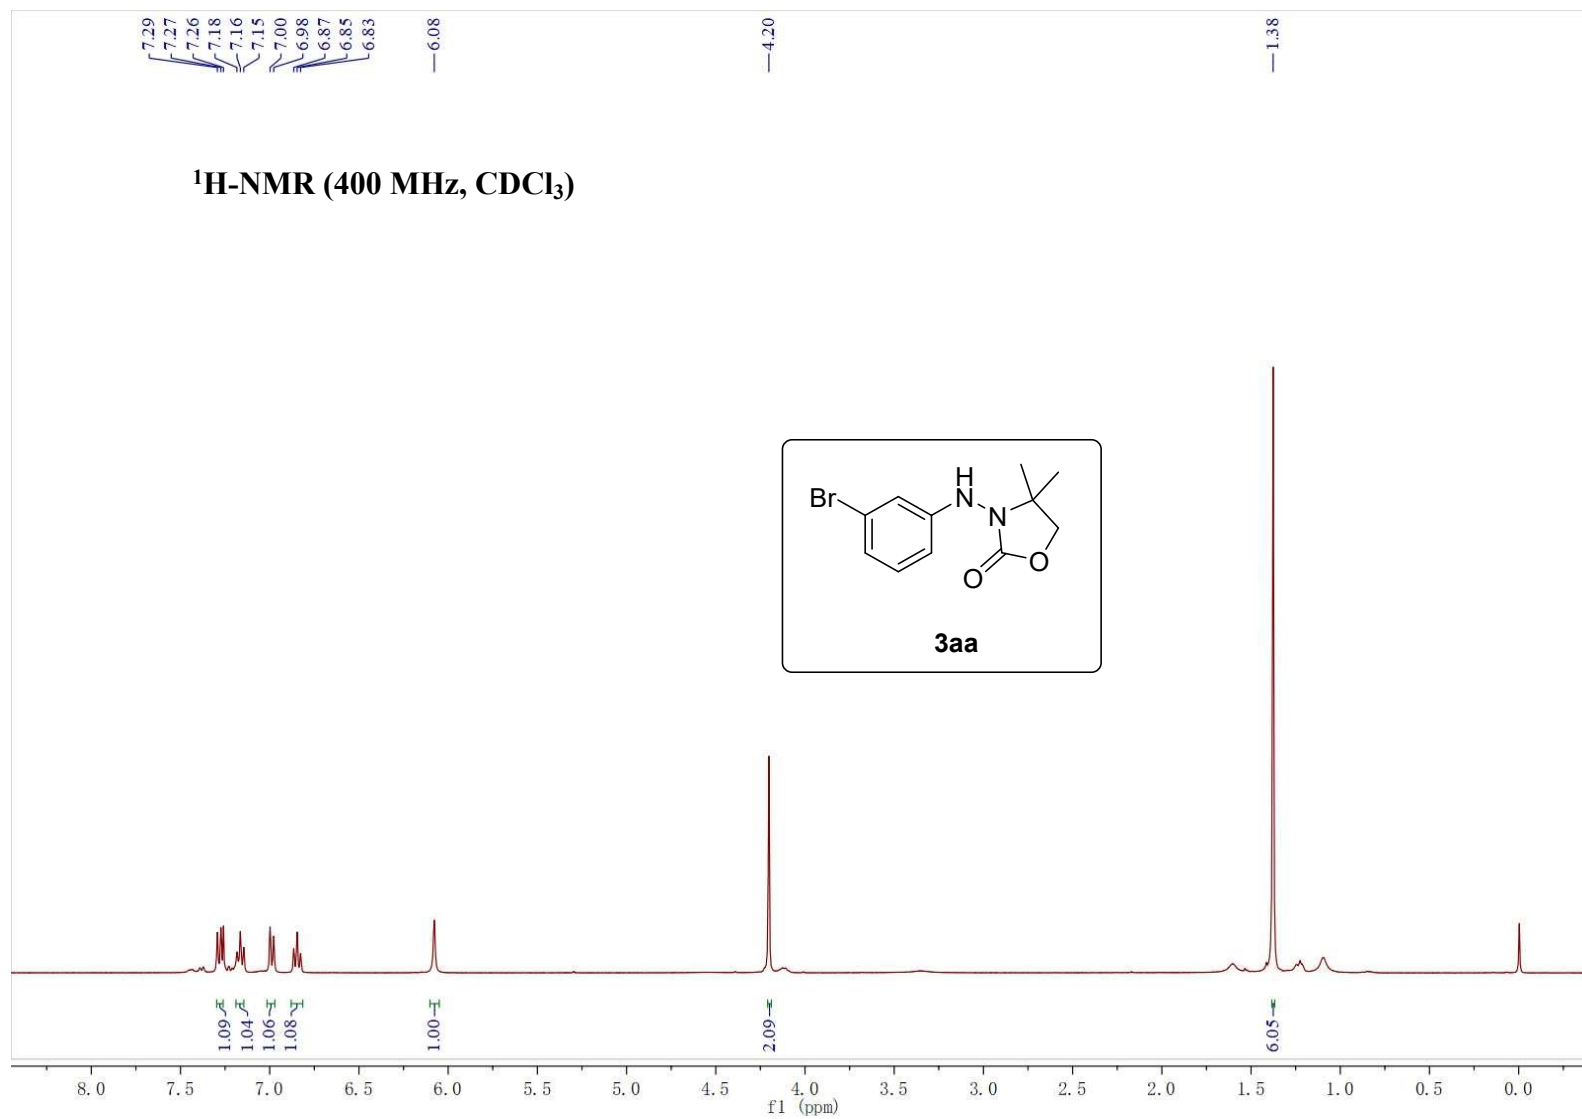

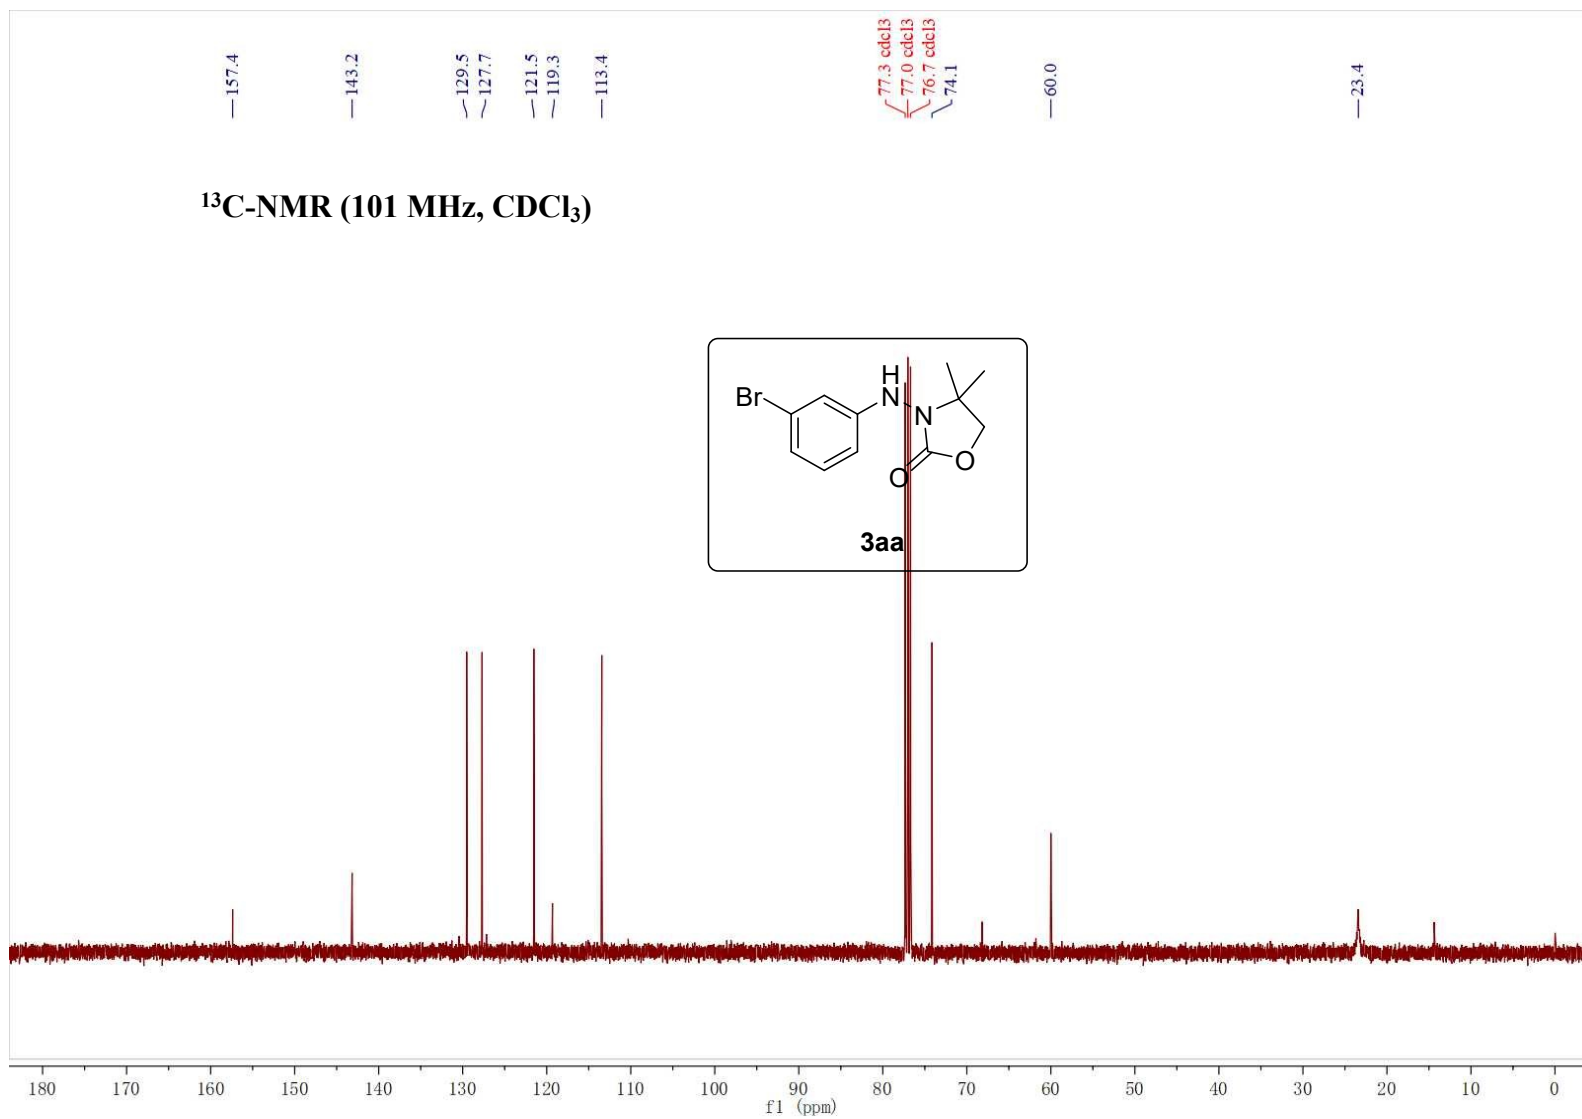

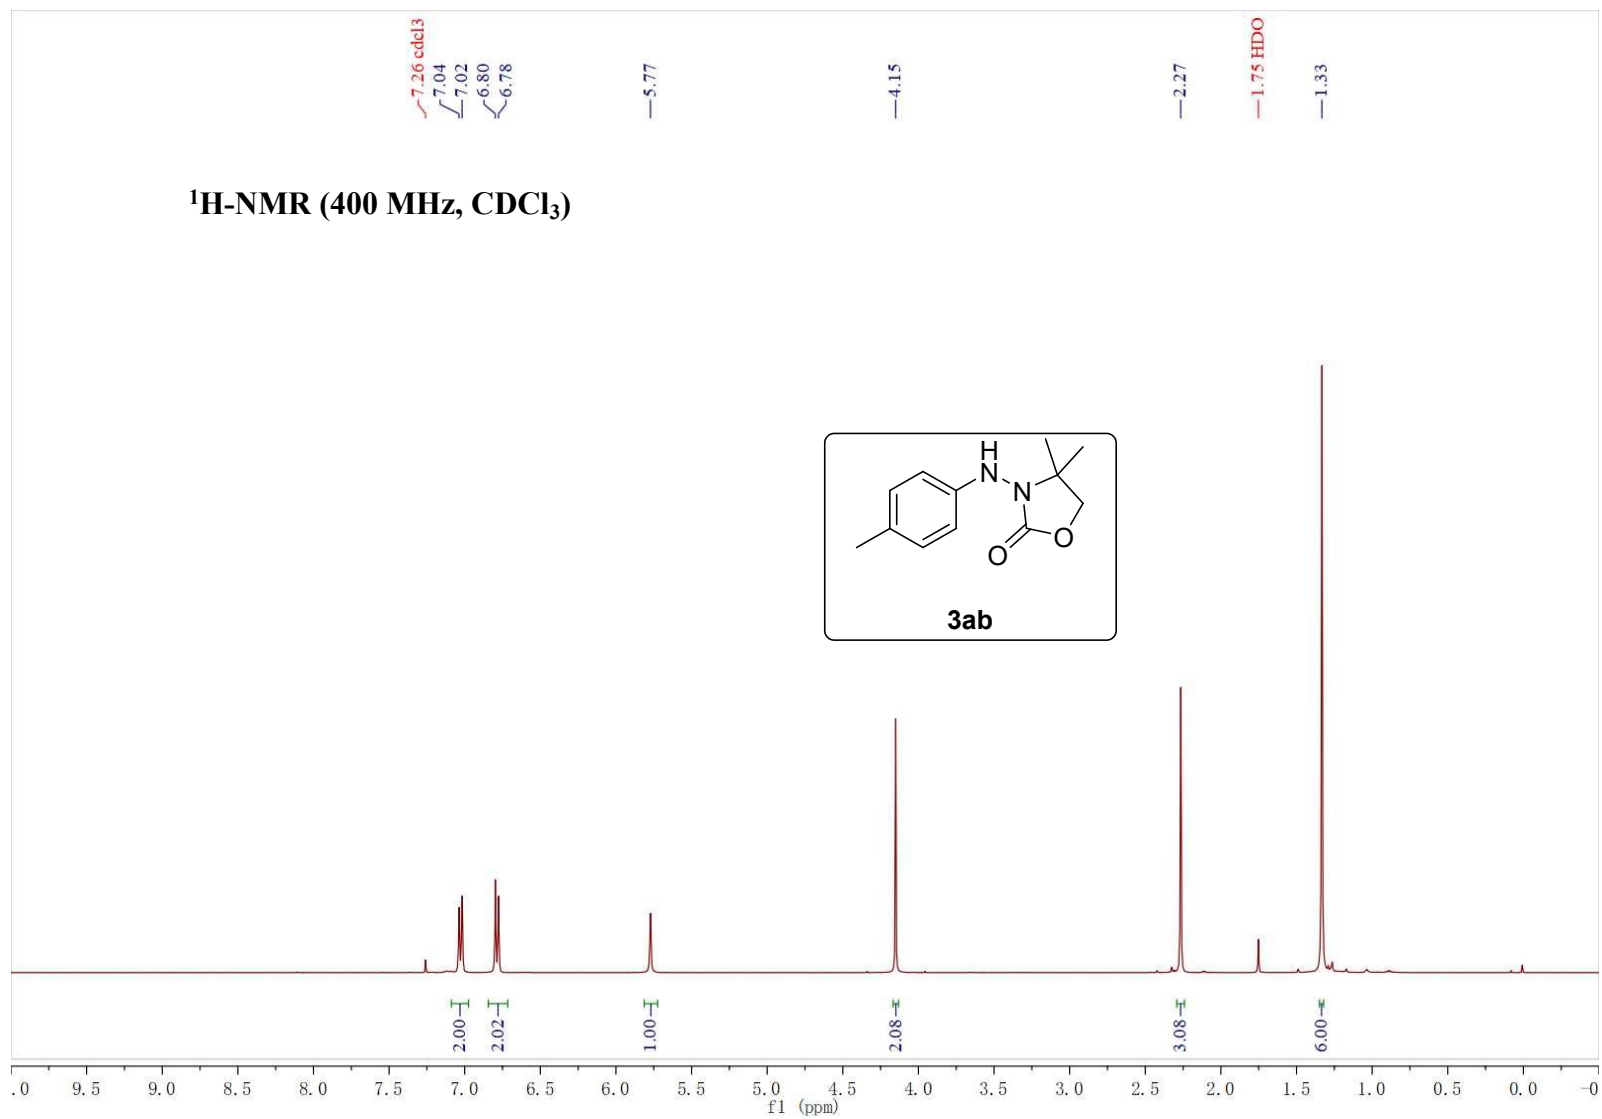

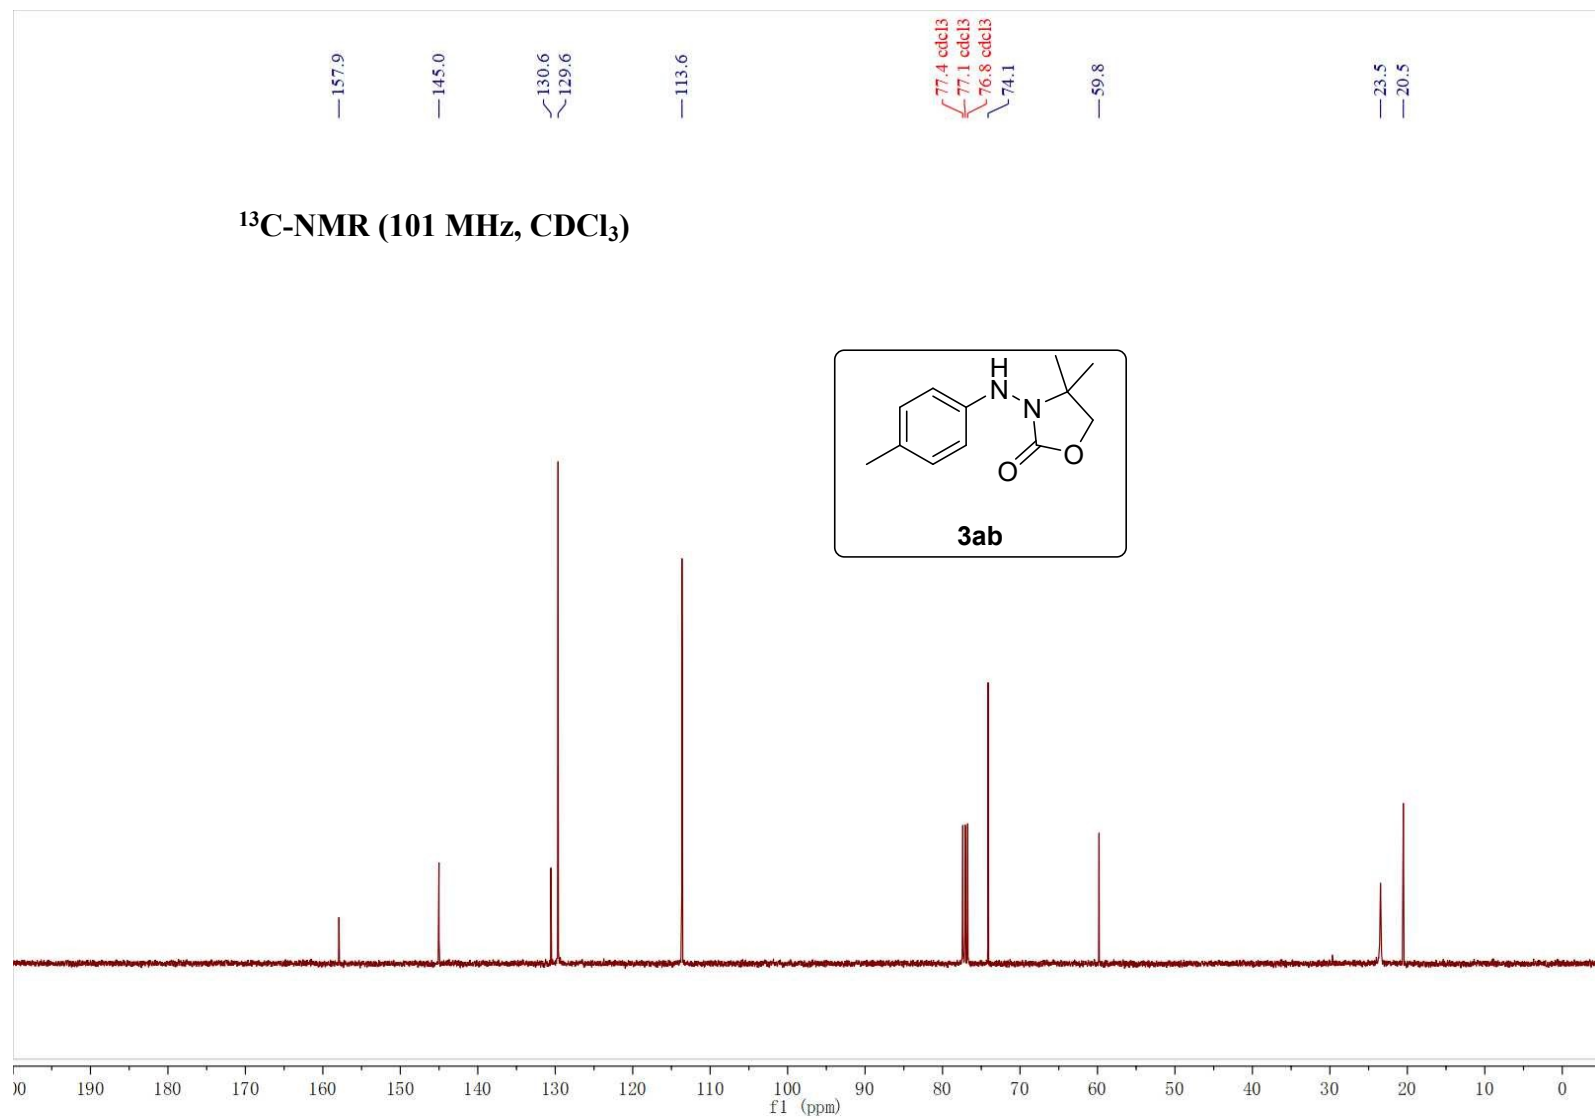



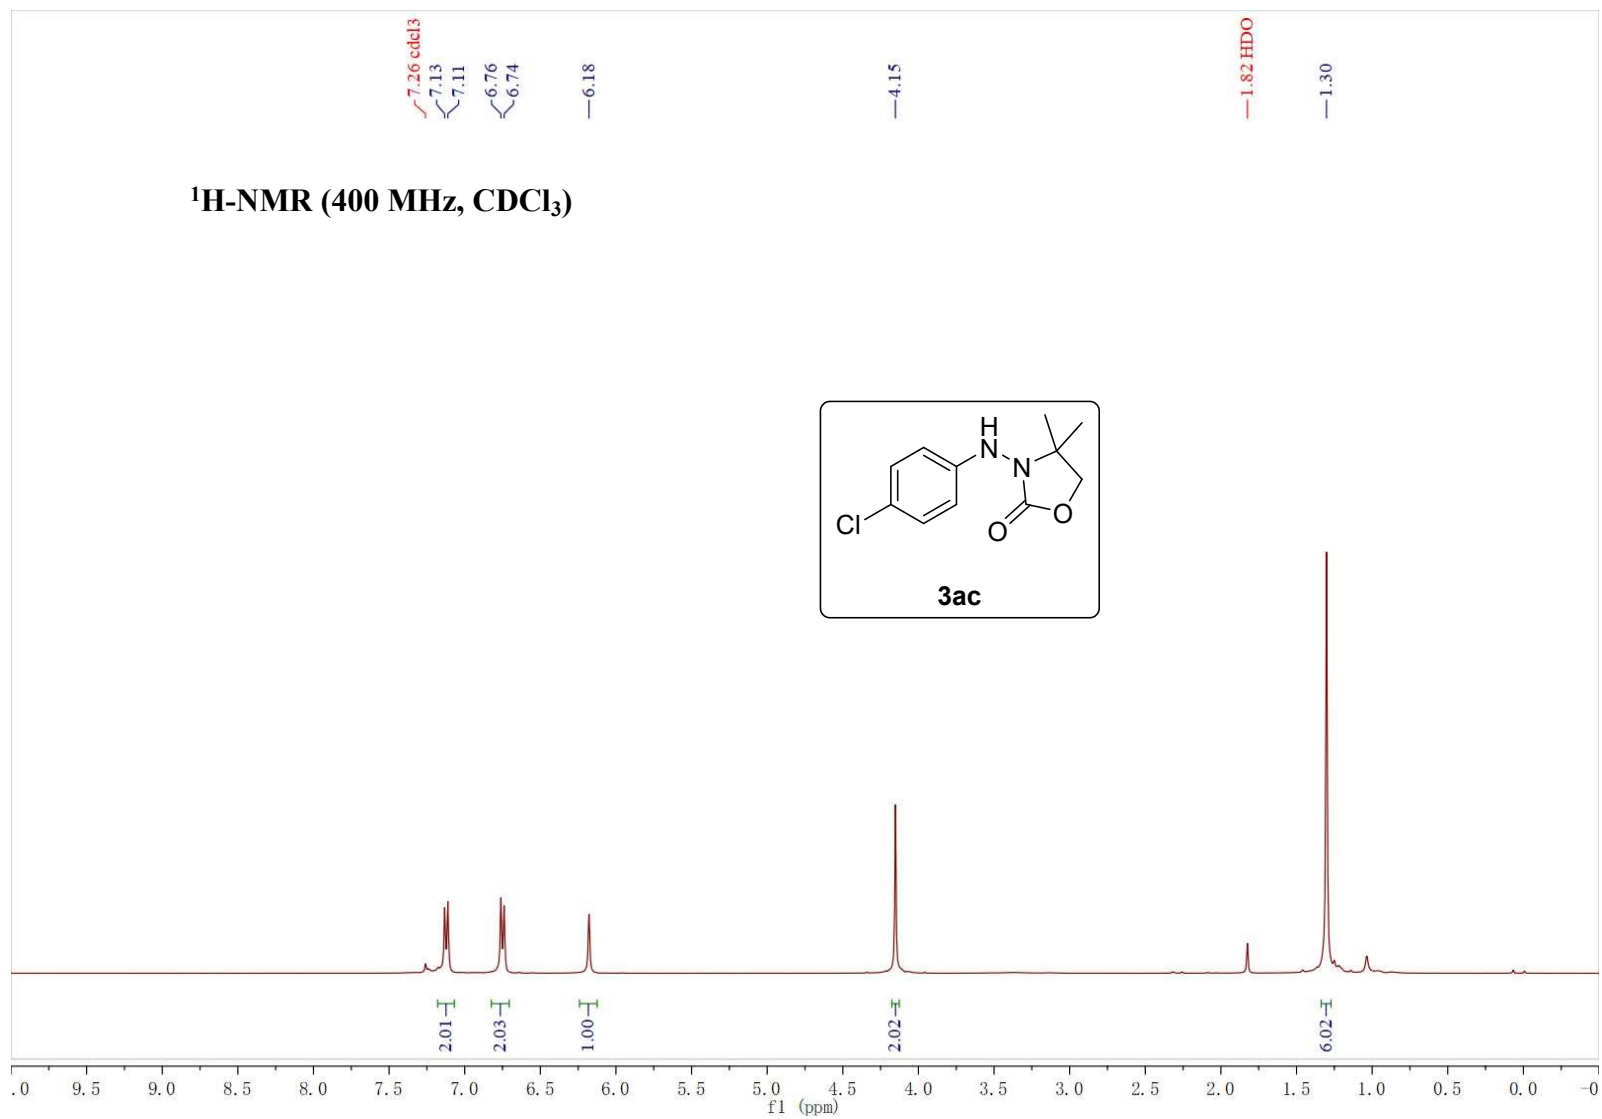

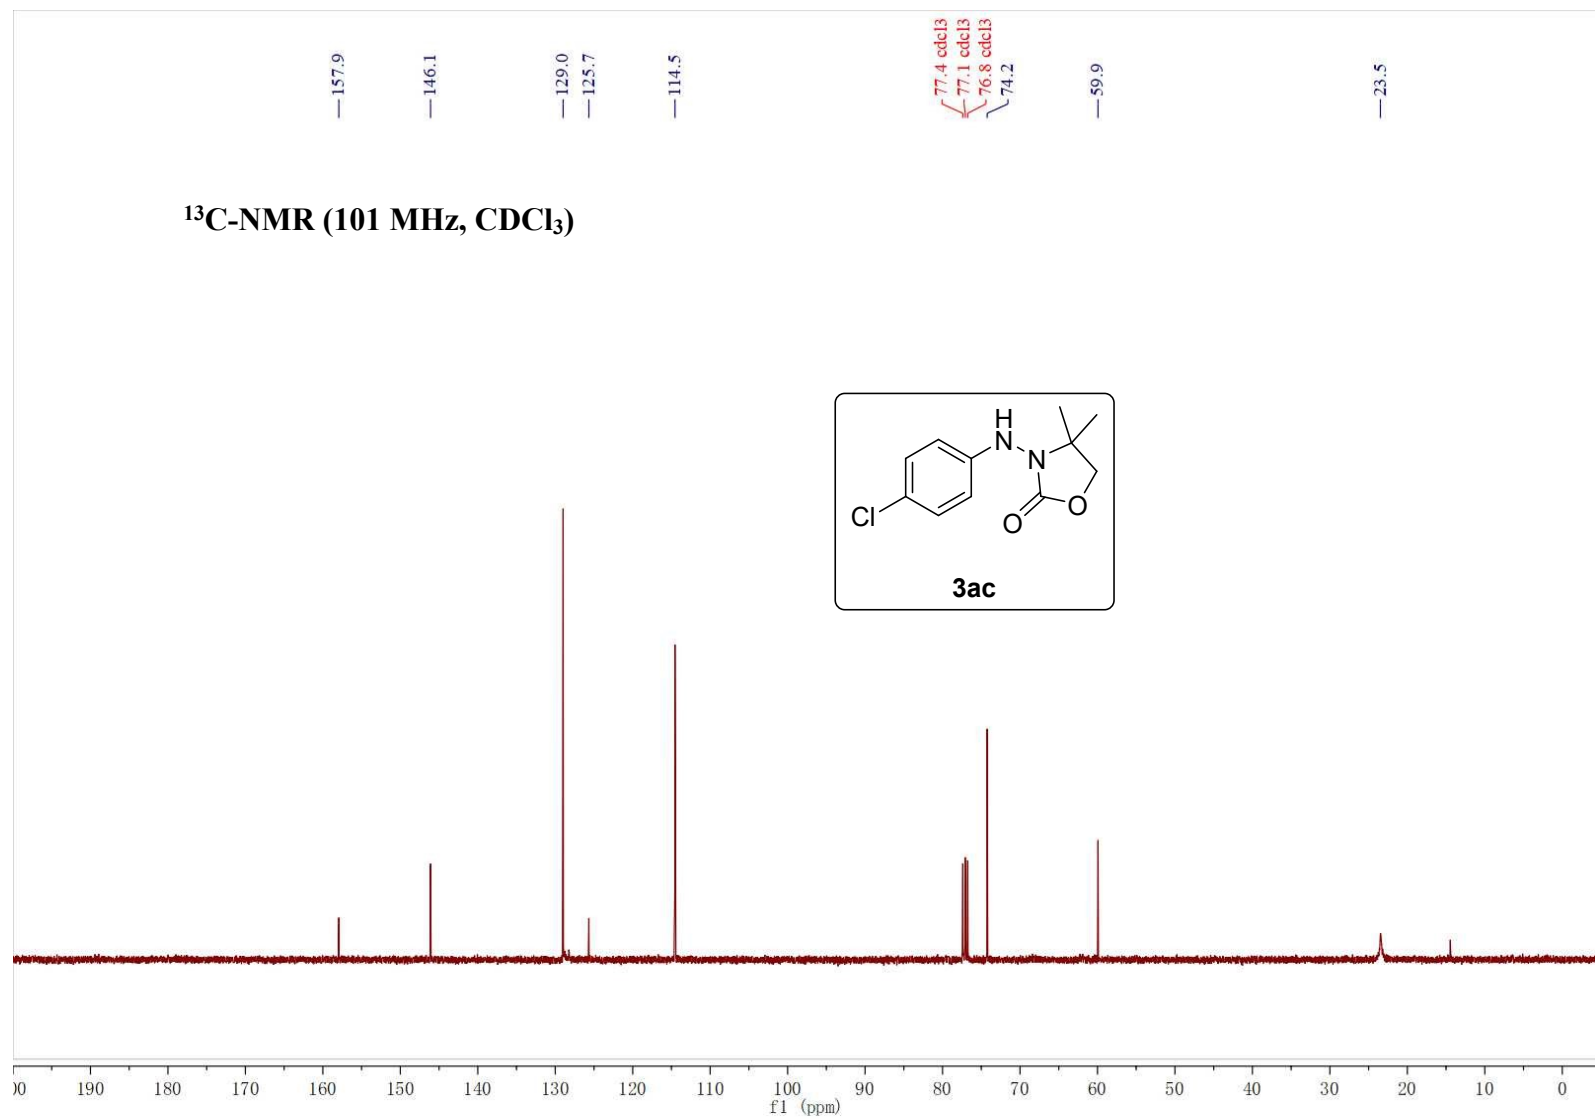

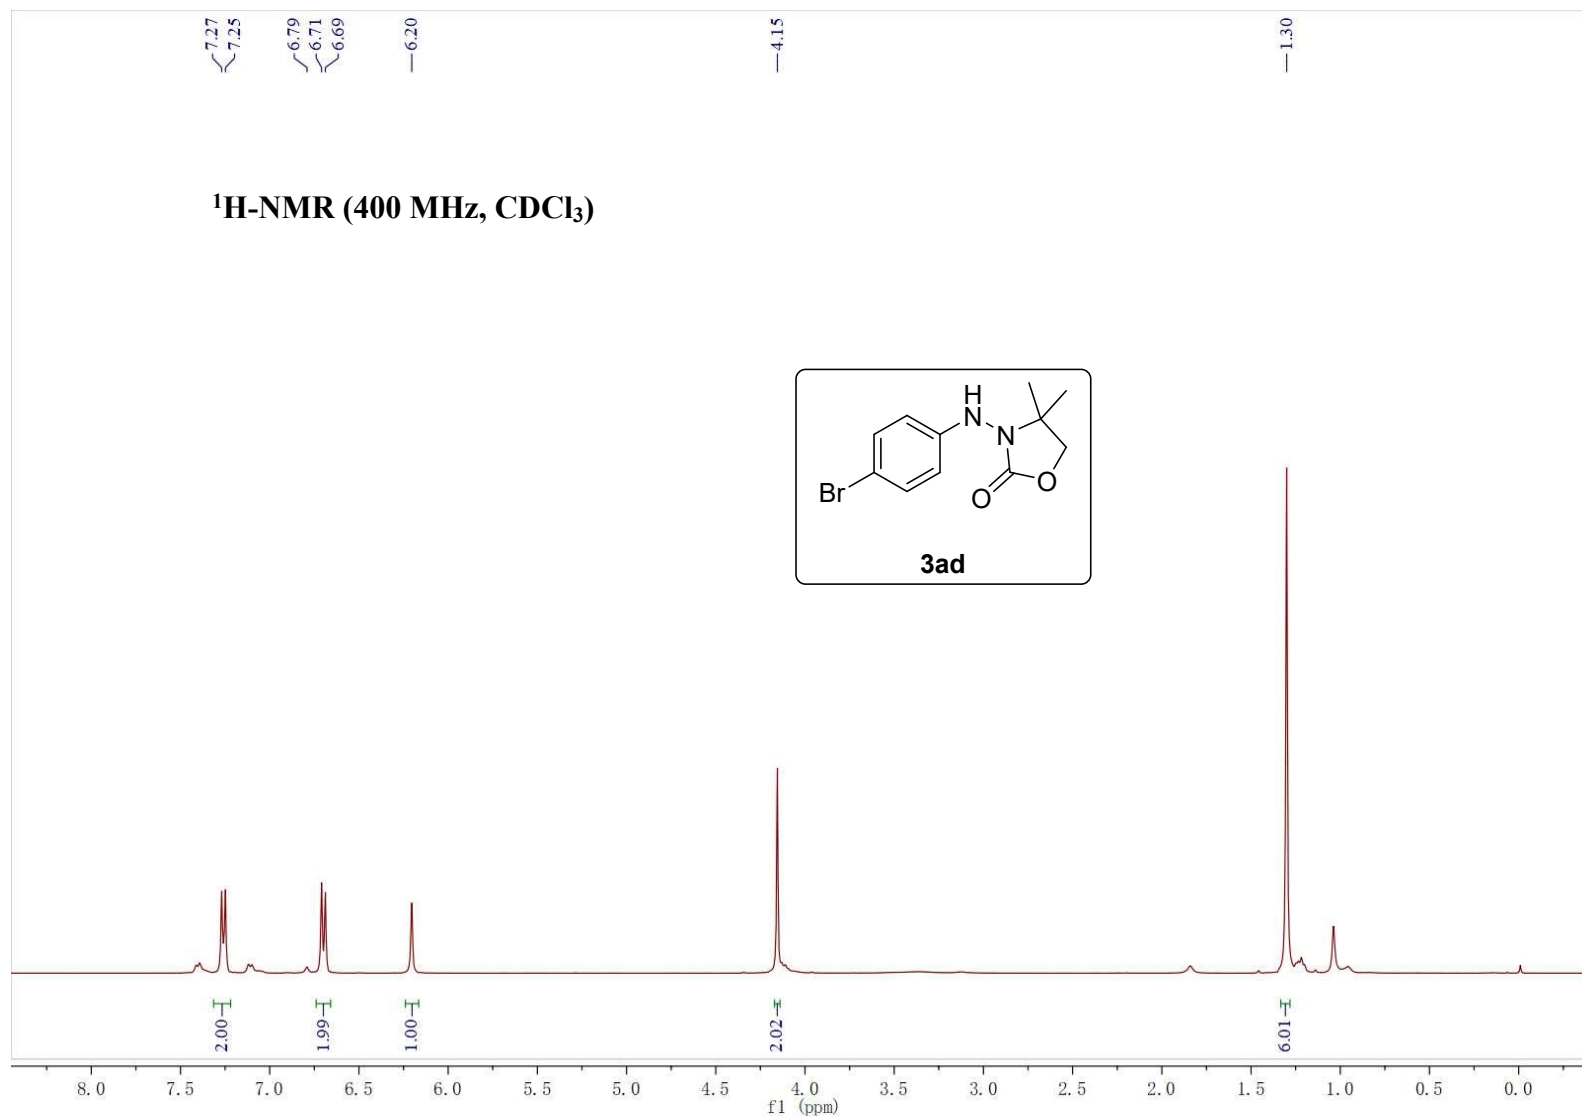

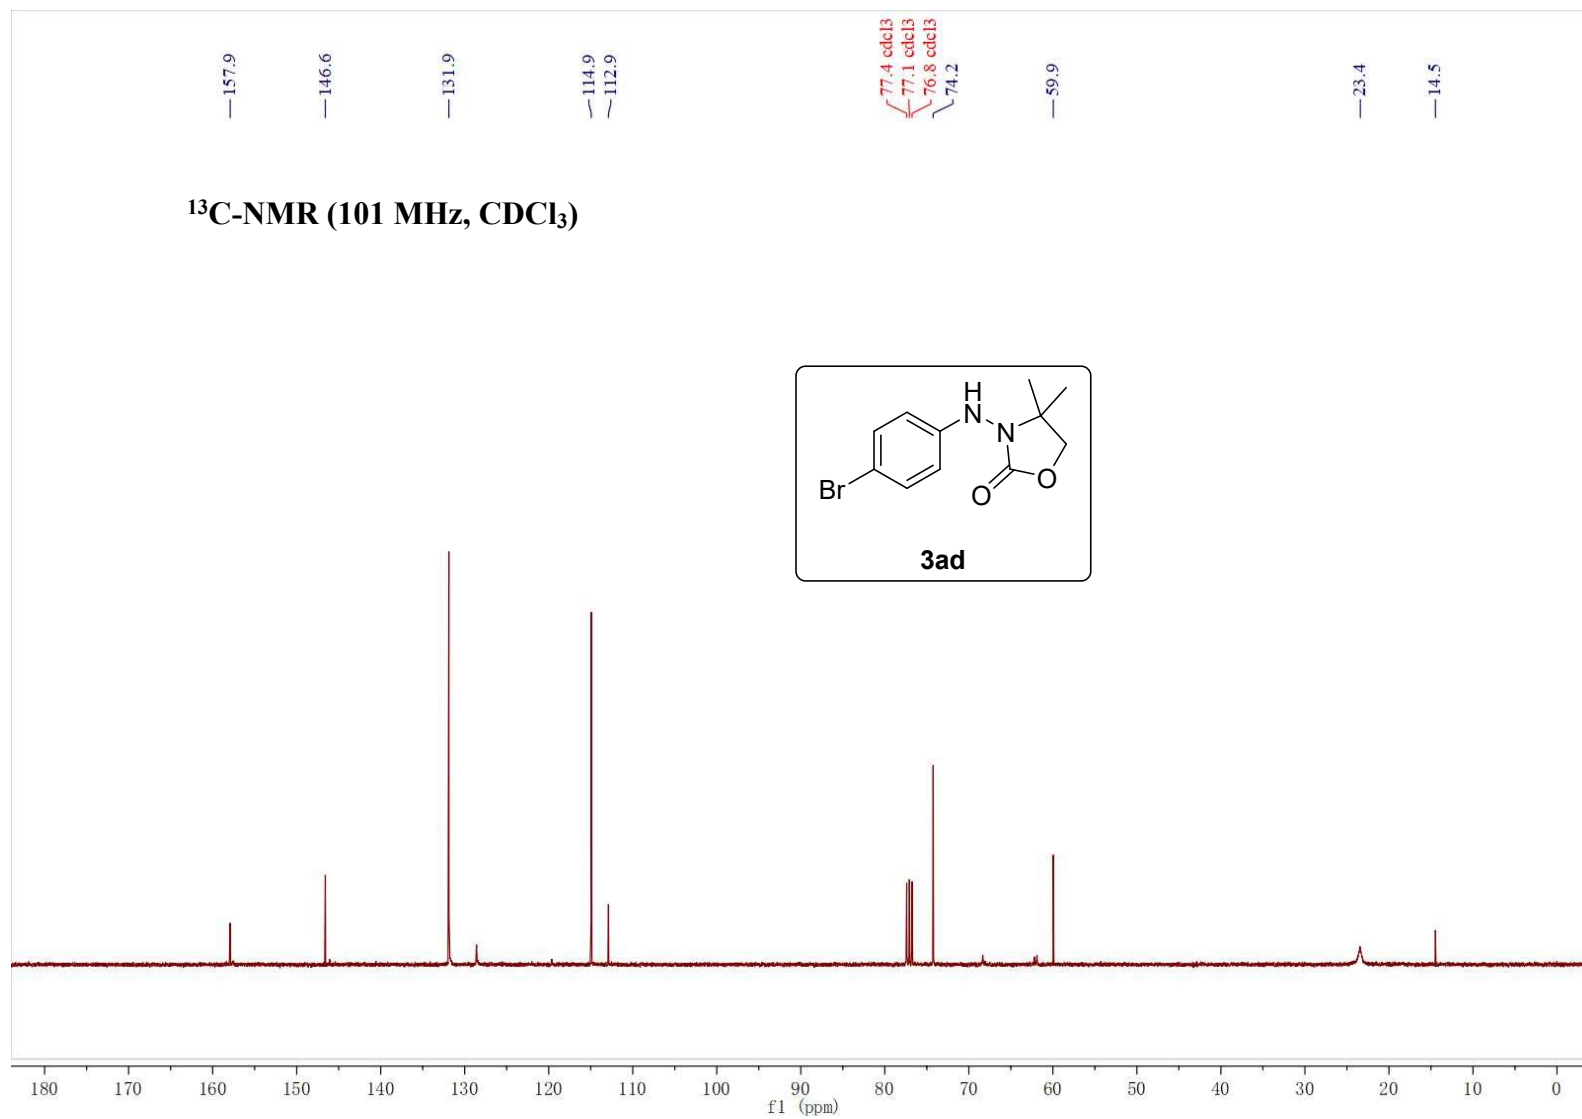

**<sup>1</sup>H-NMR (400 MHz, CDCl<sub>3</sub>)**

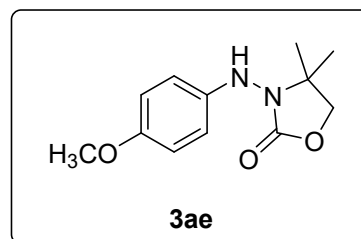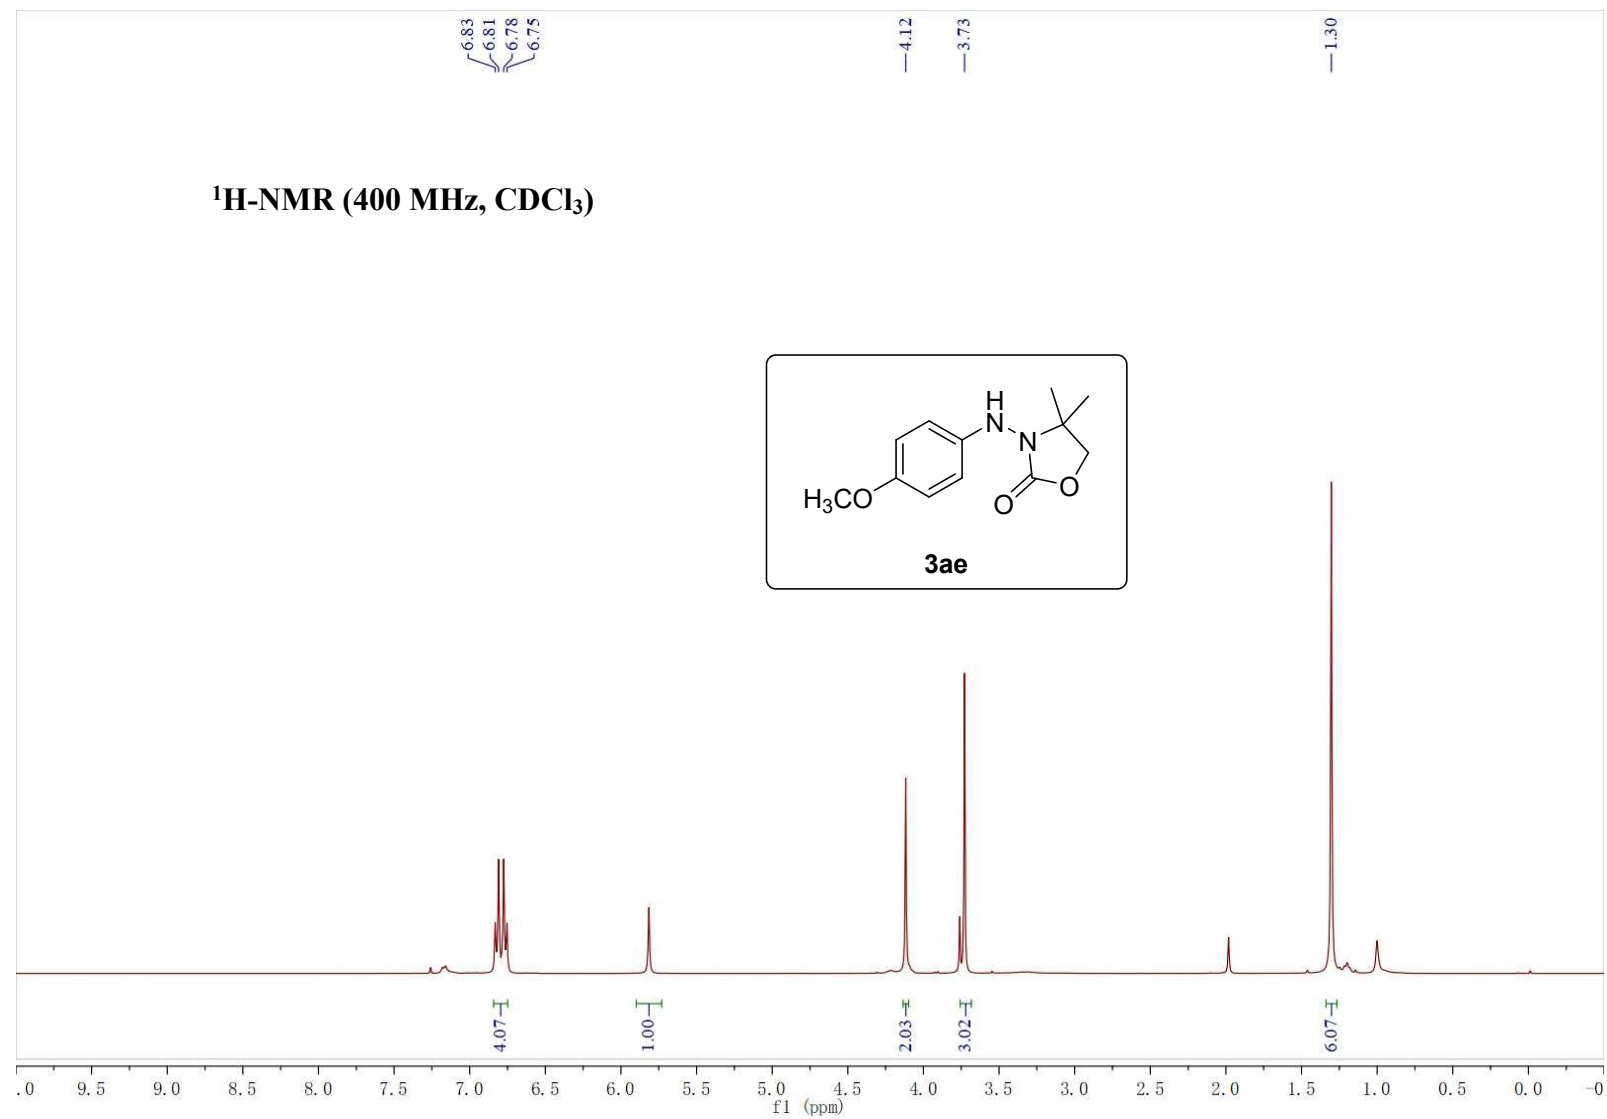

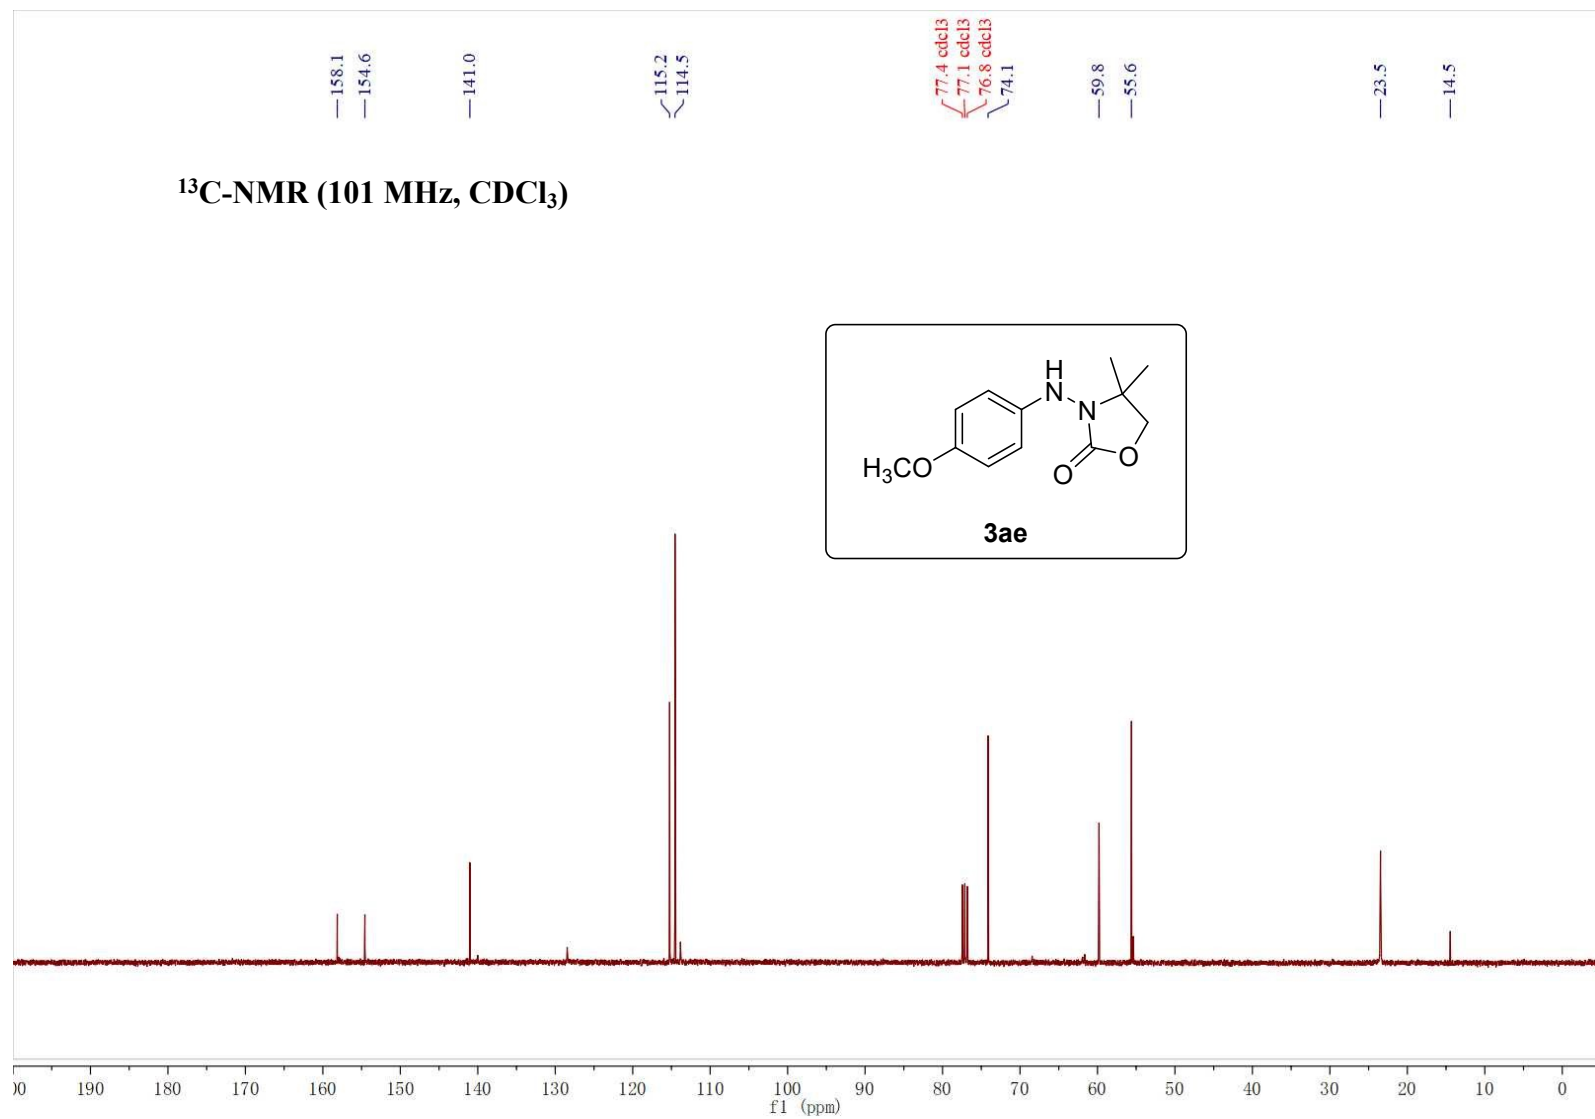

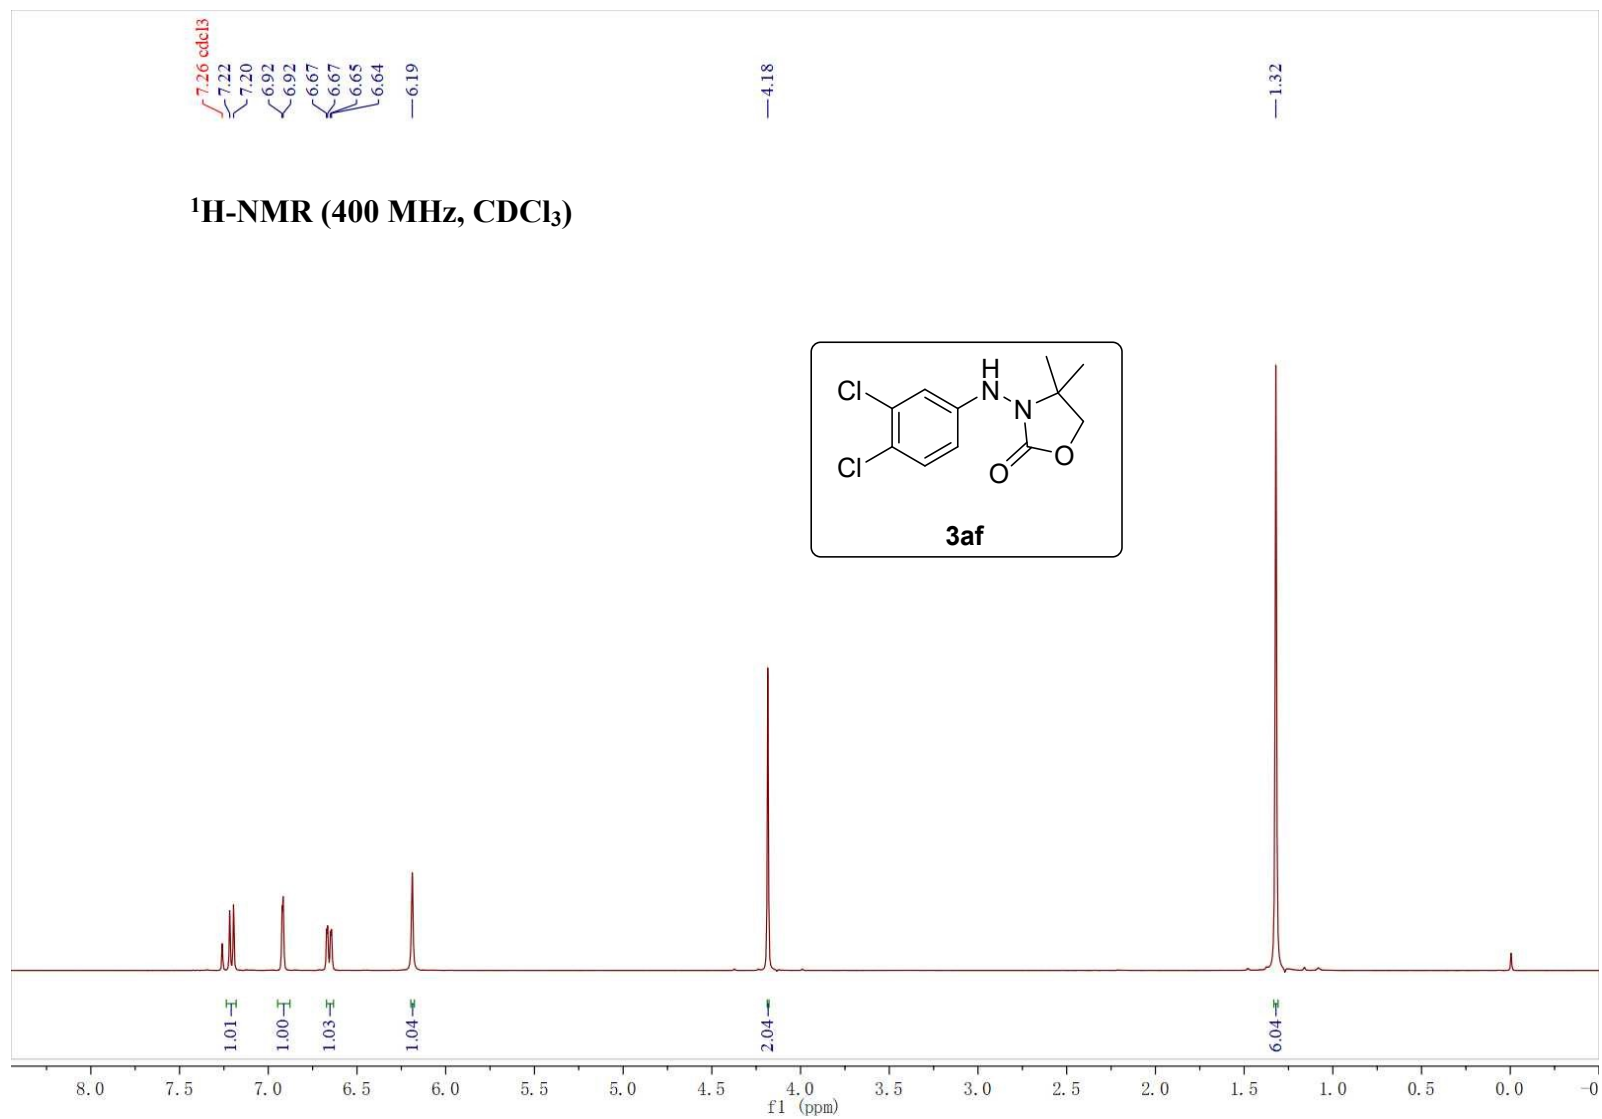

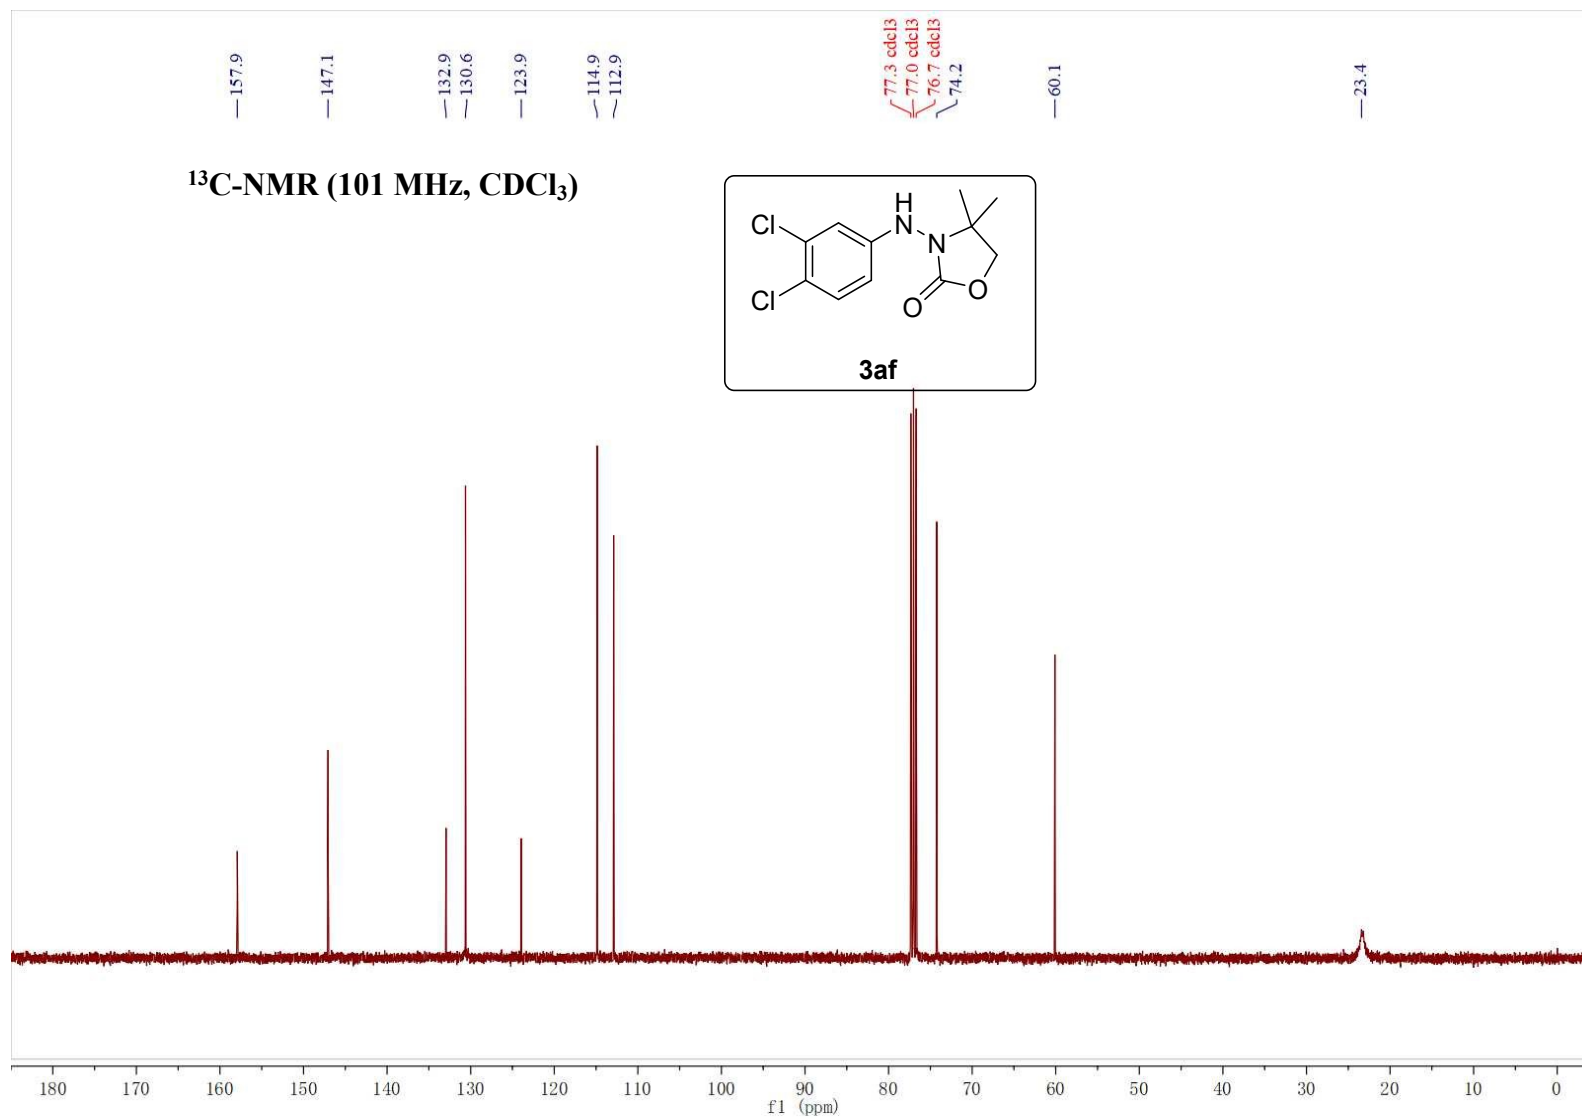



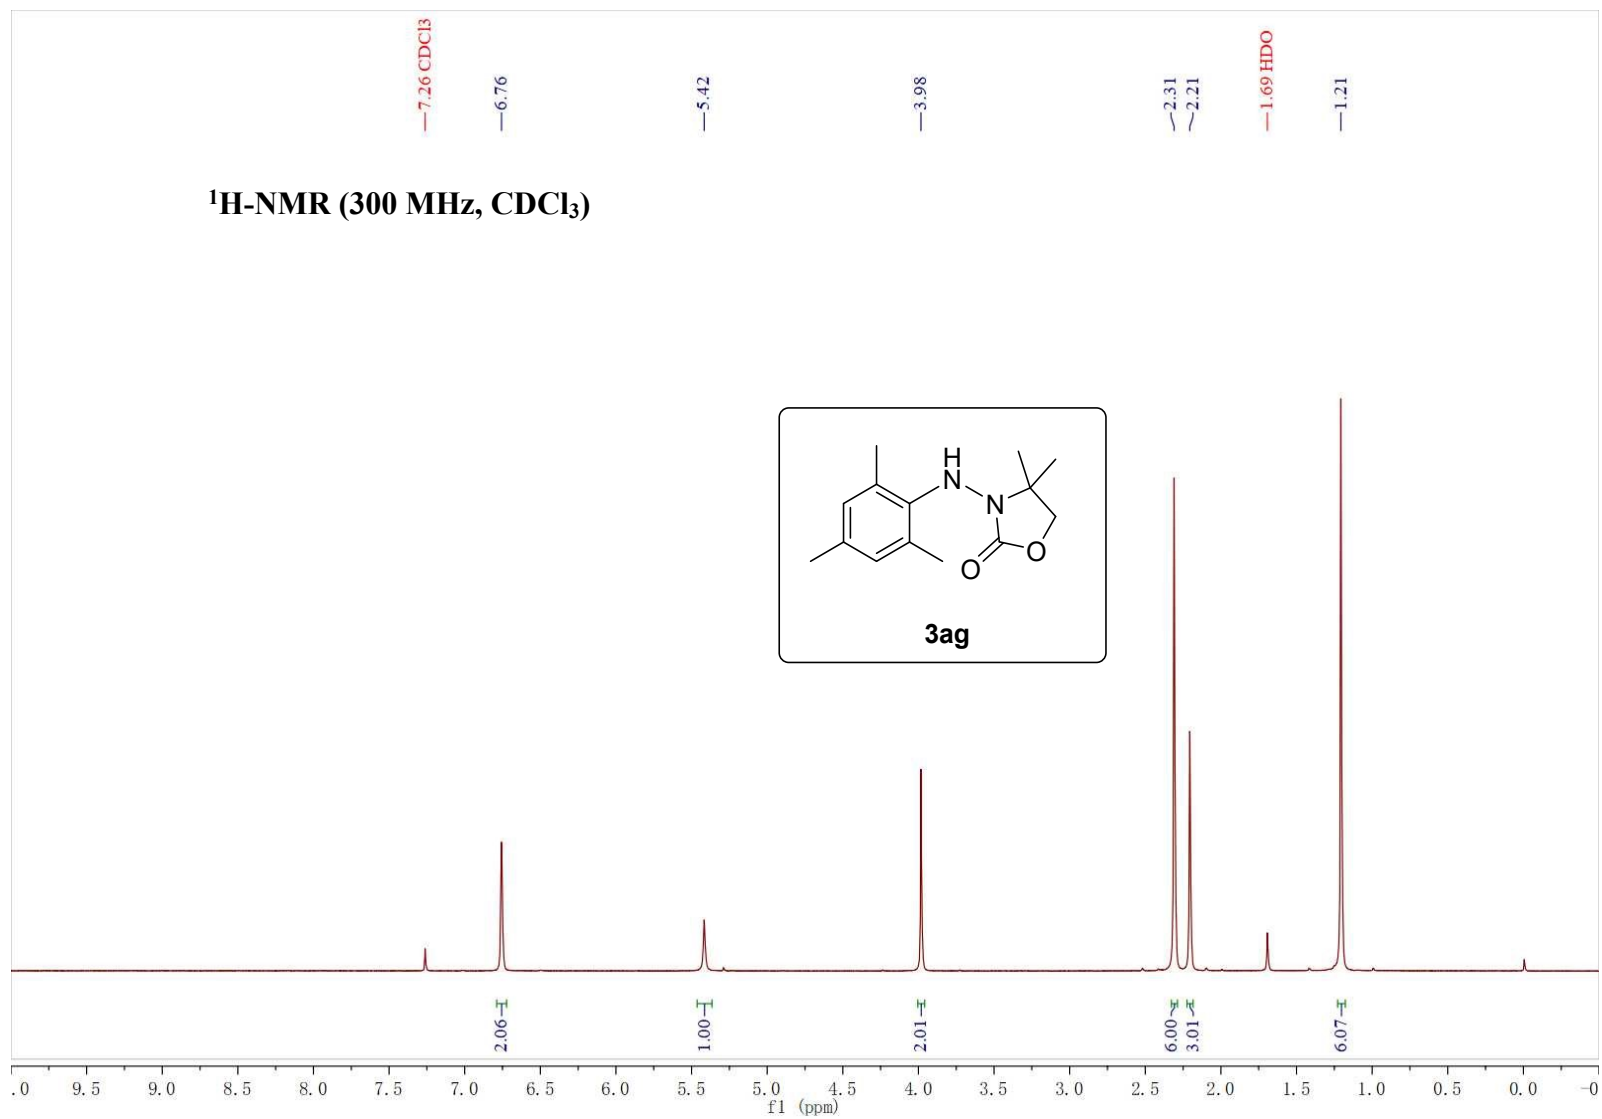

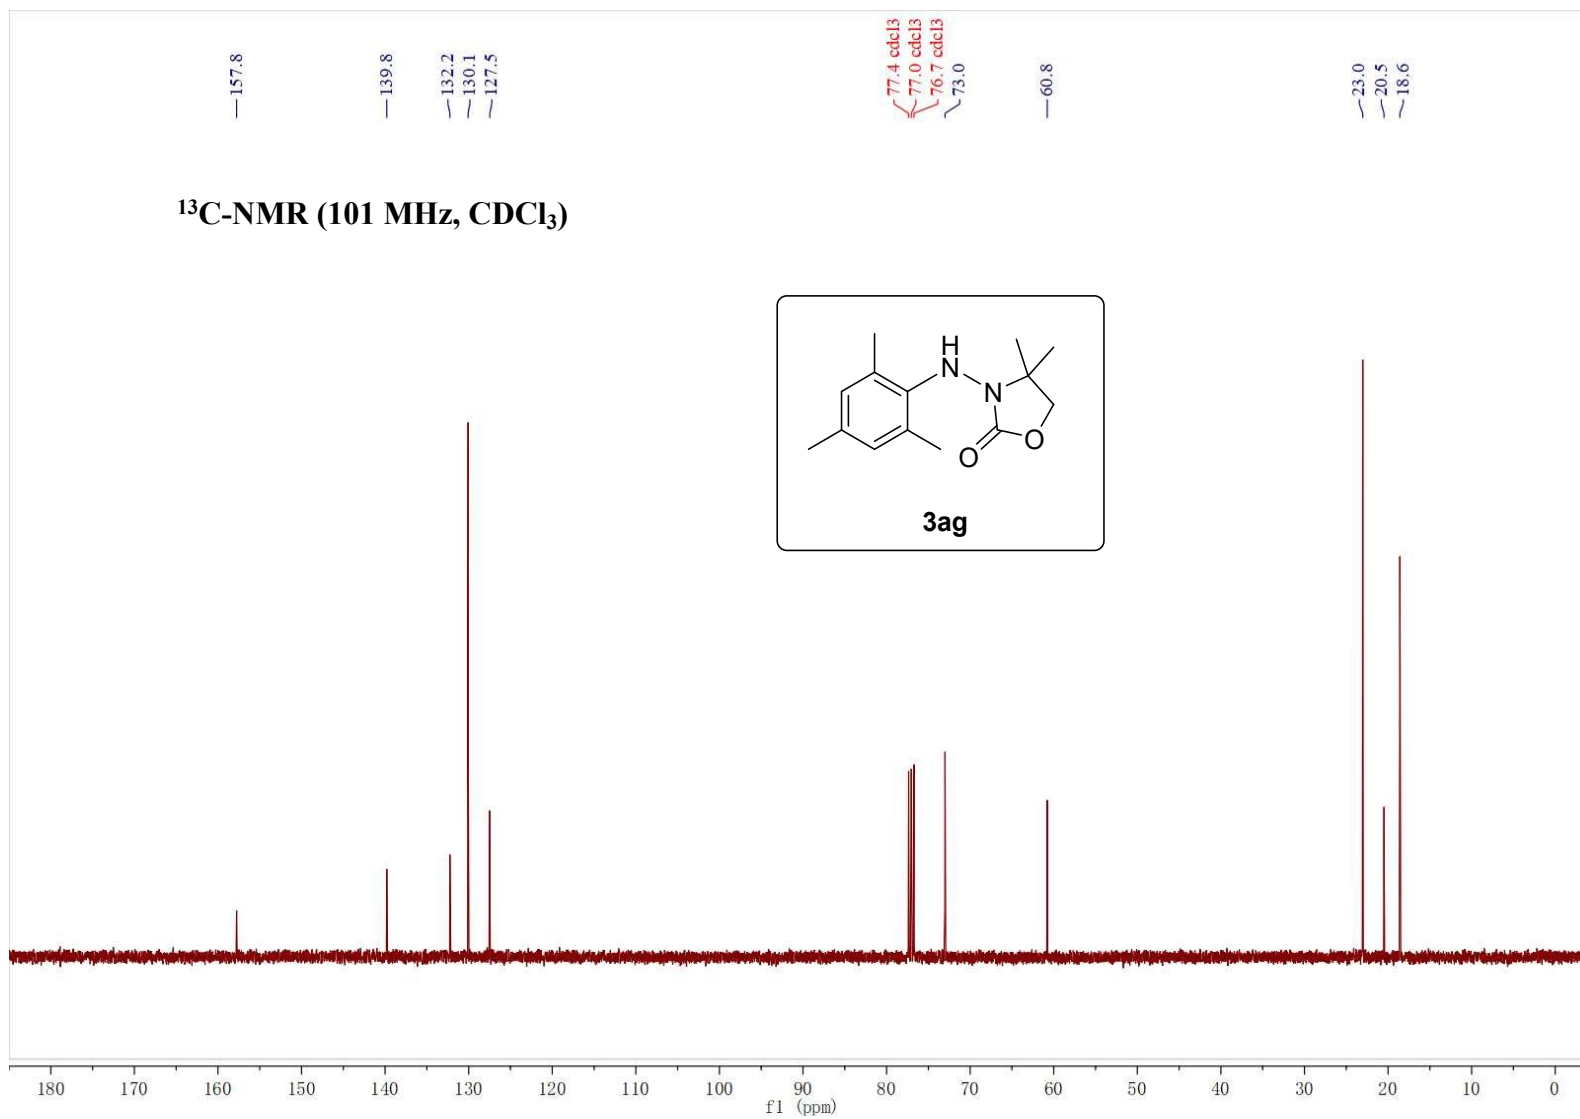

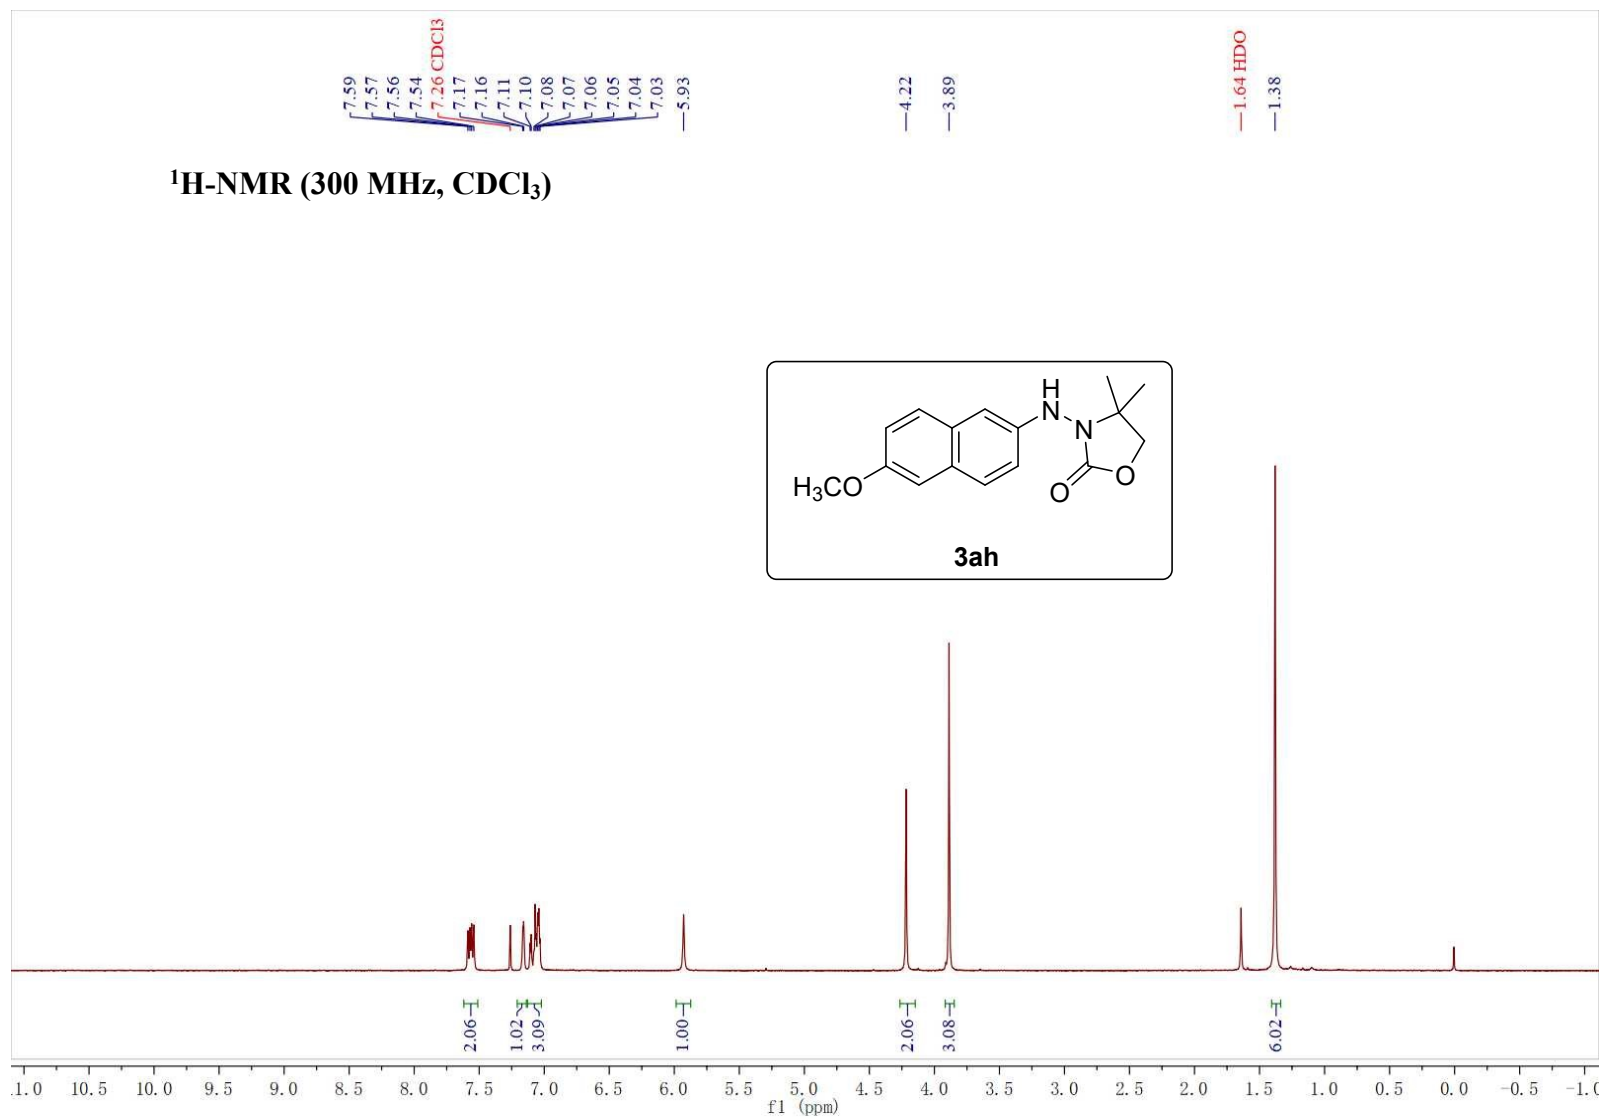

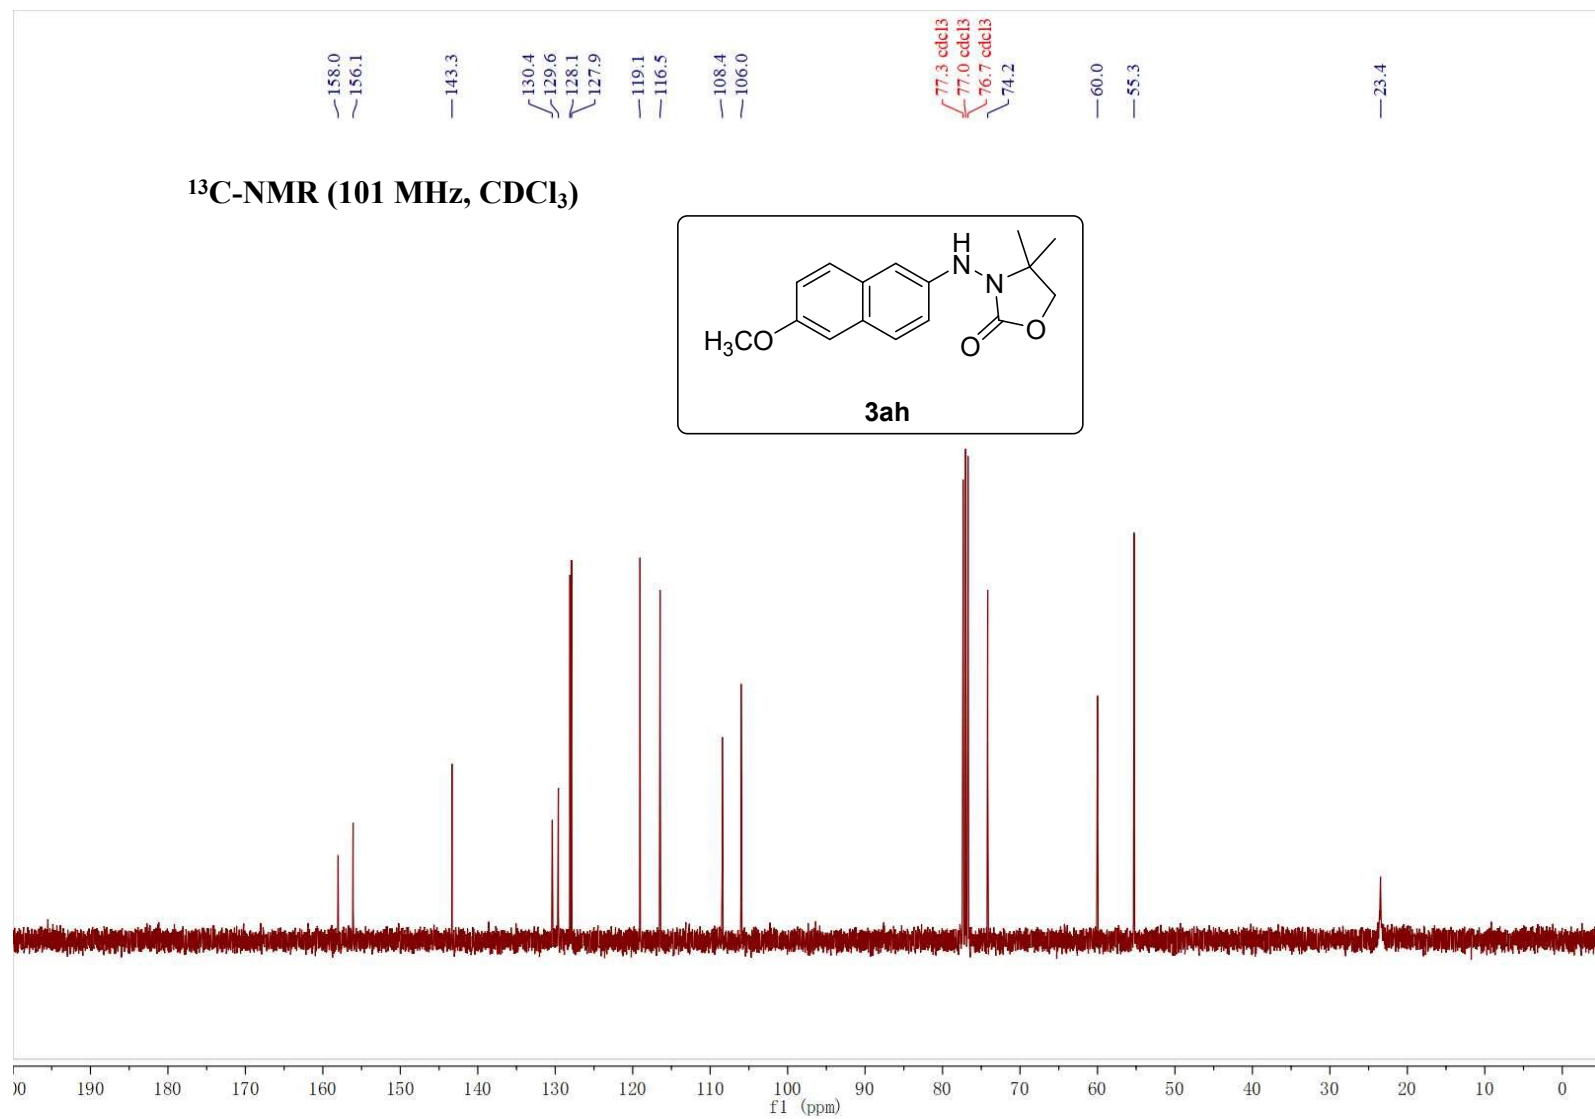

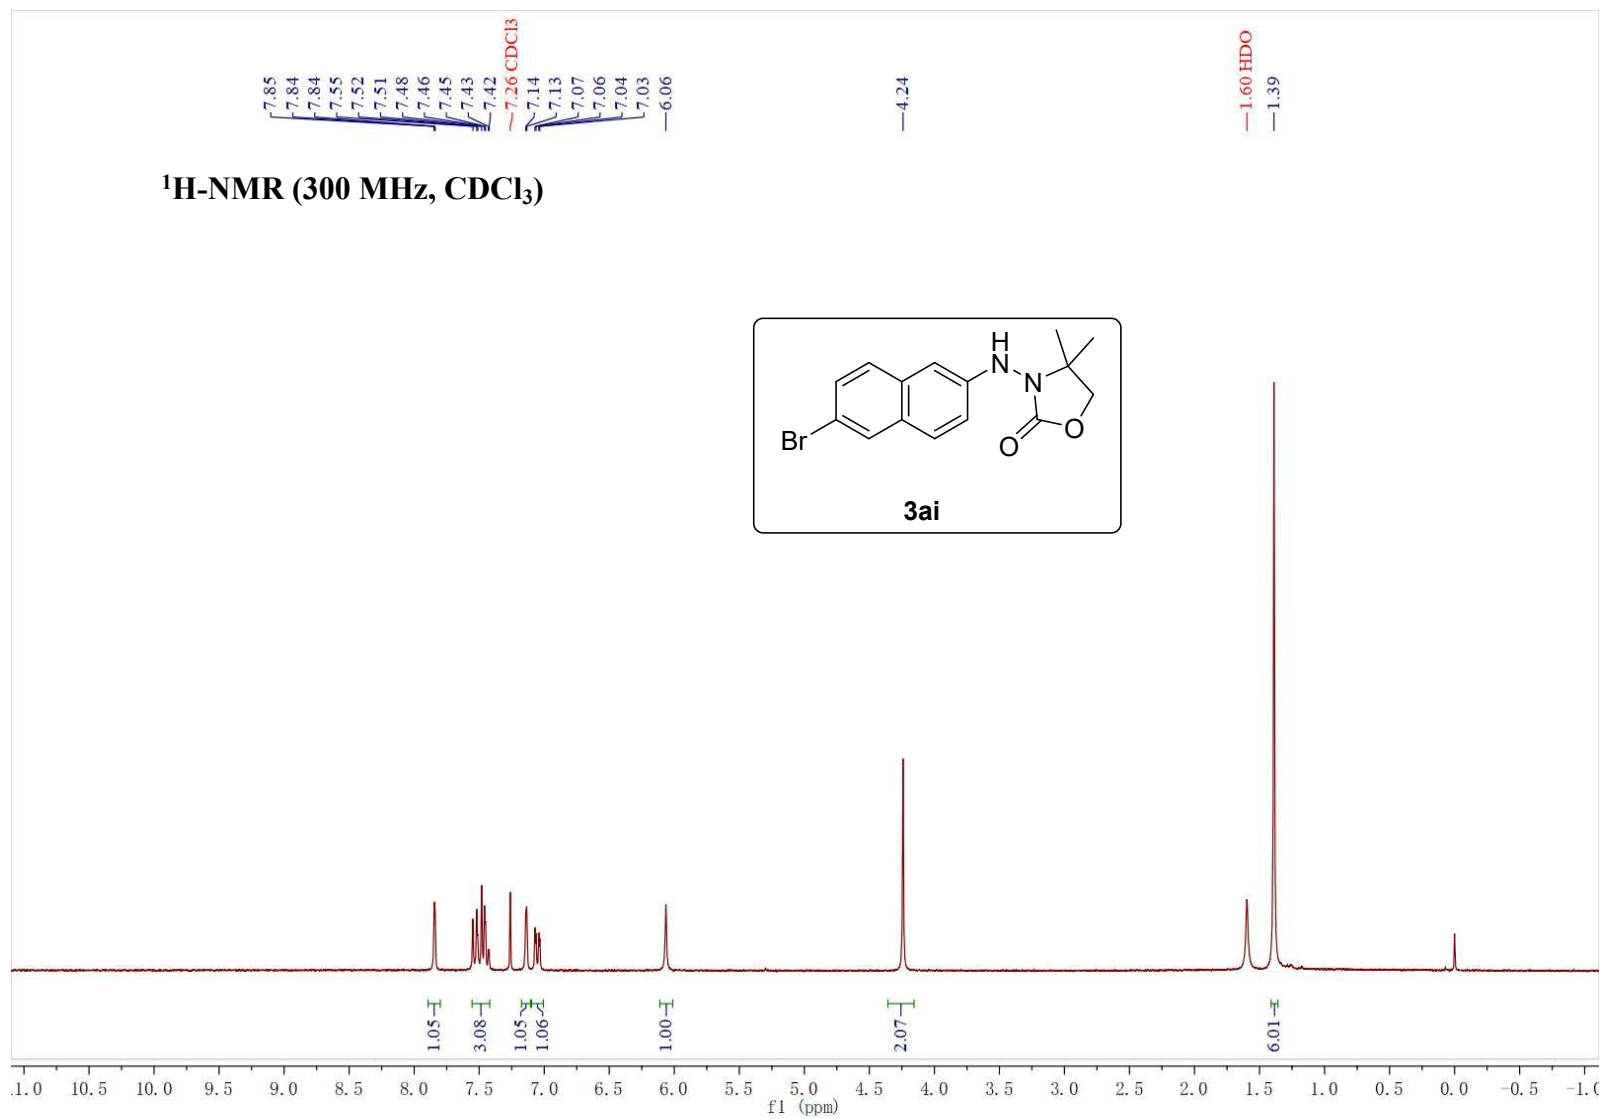

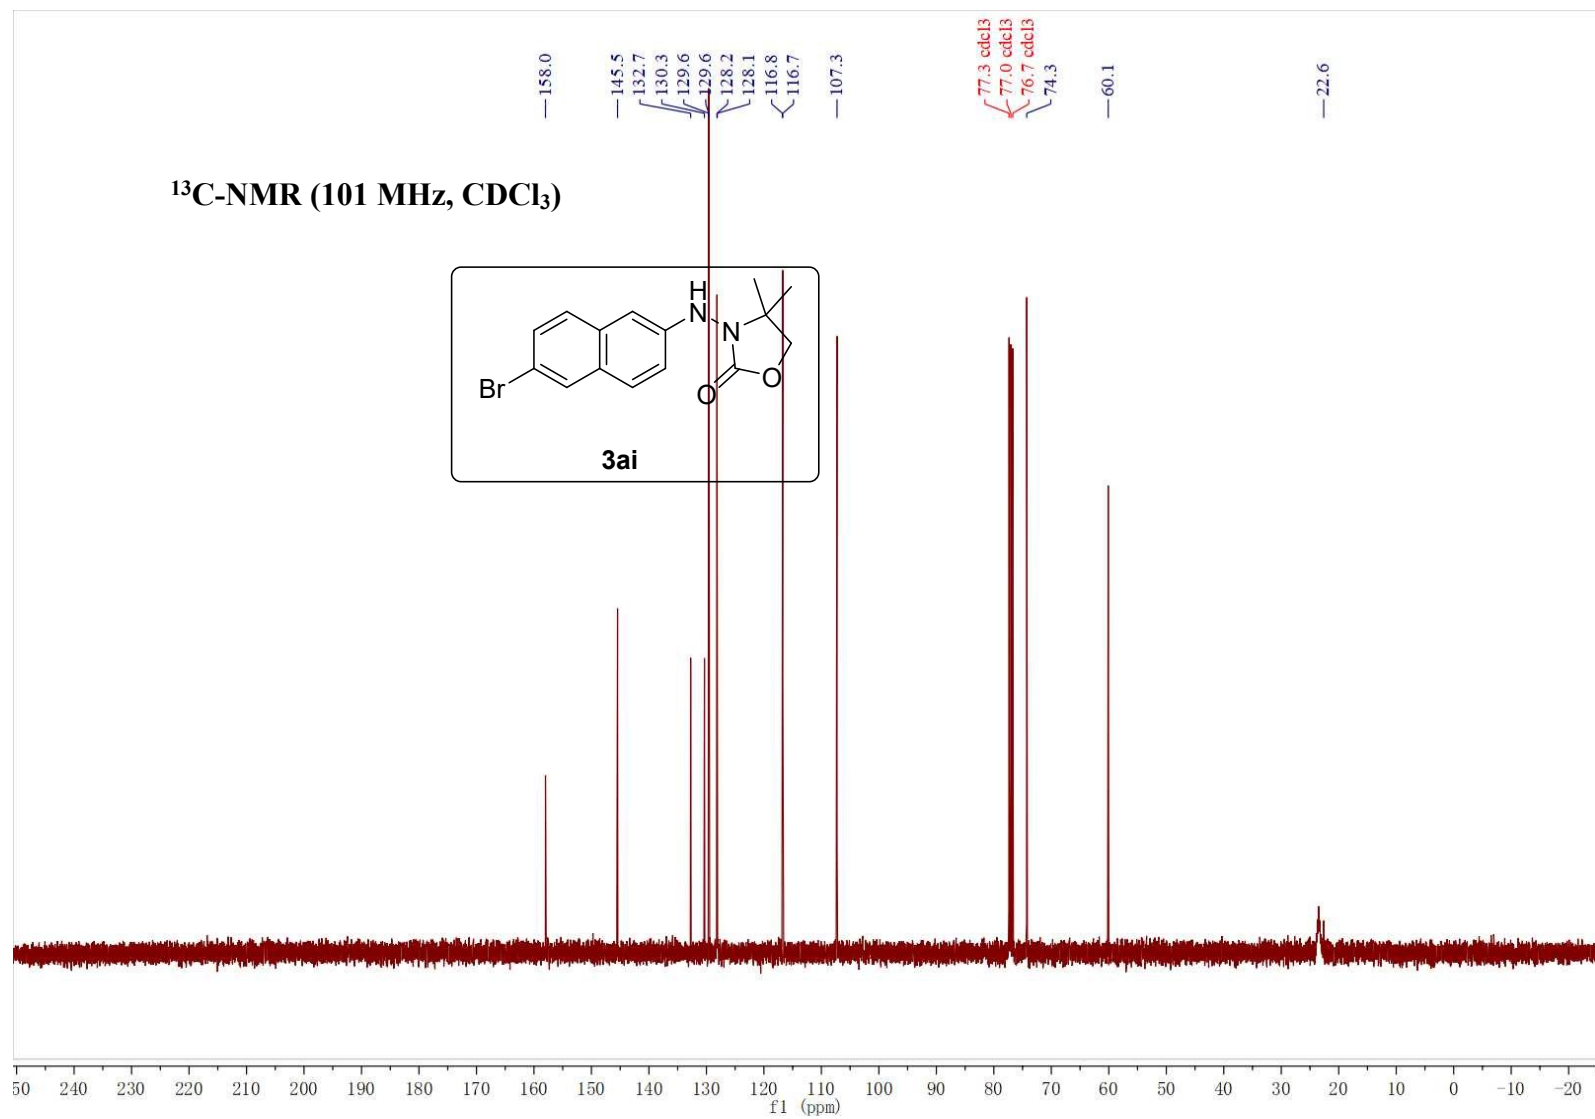

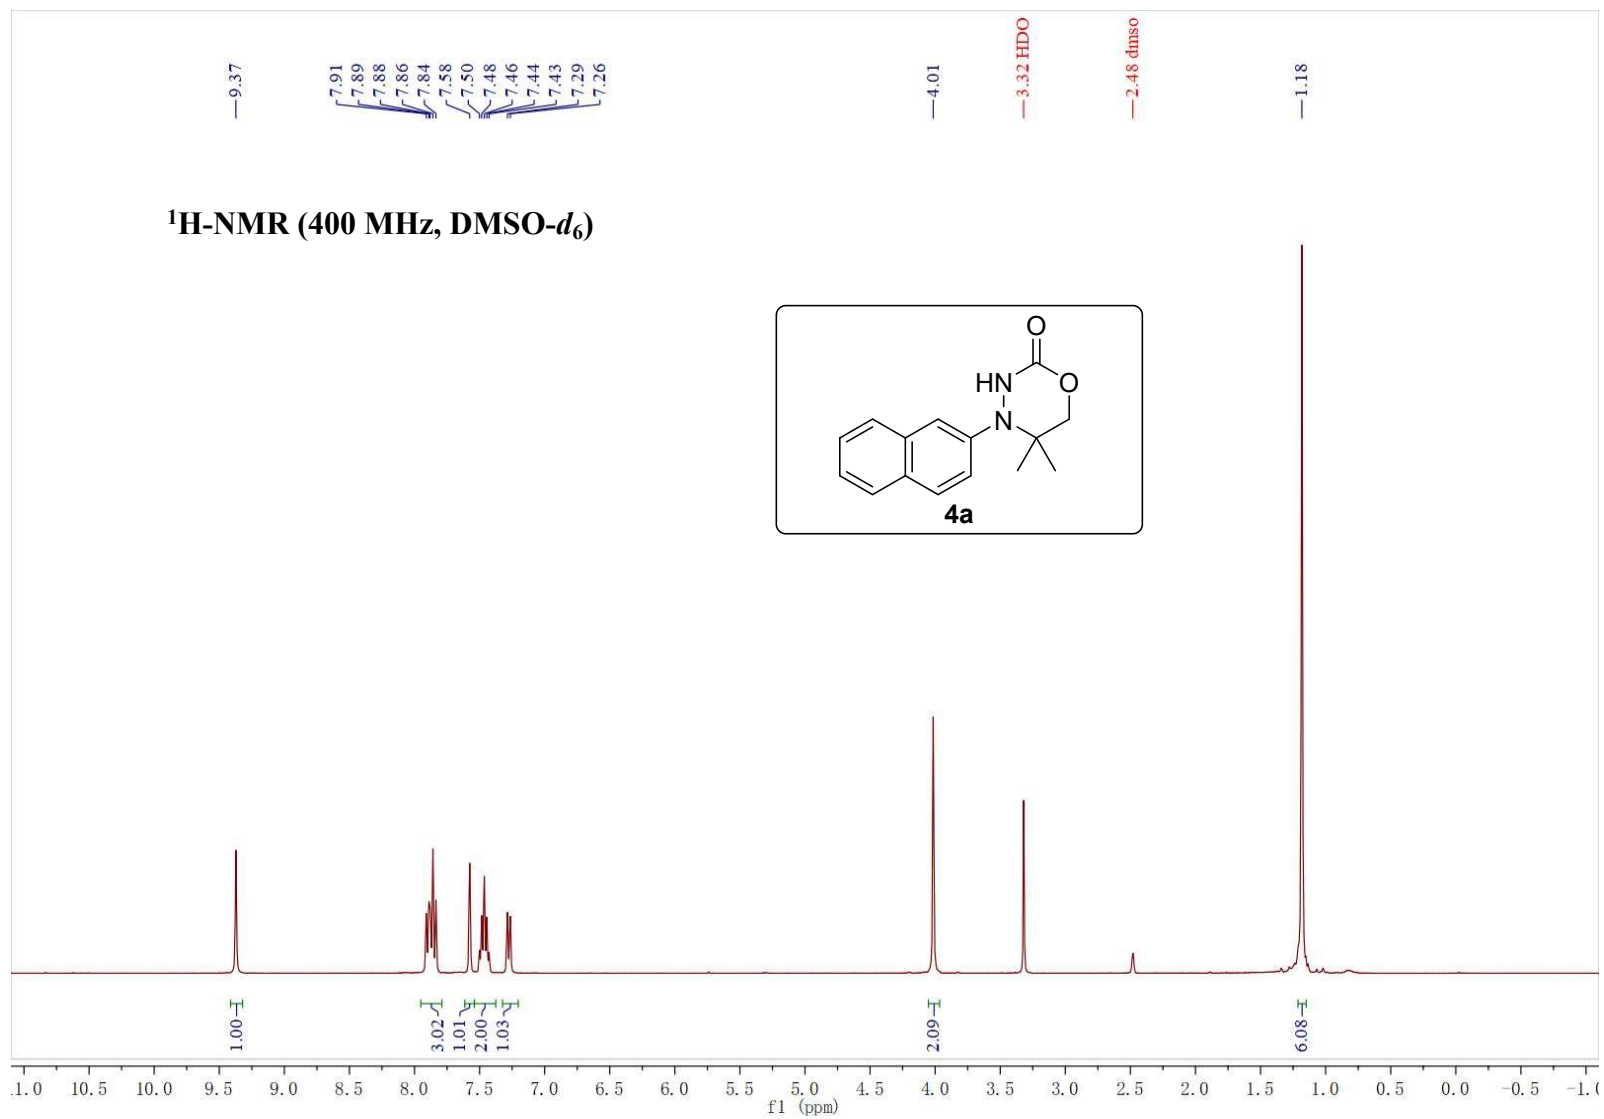

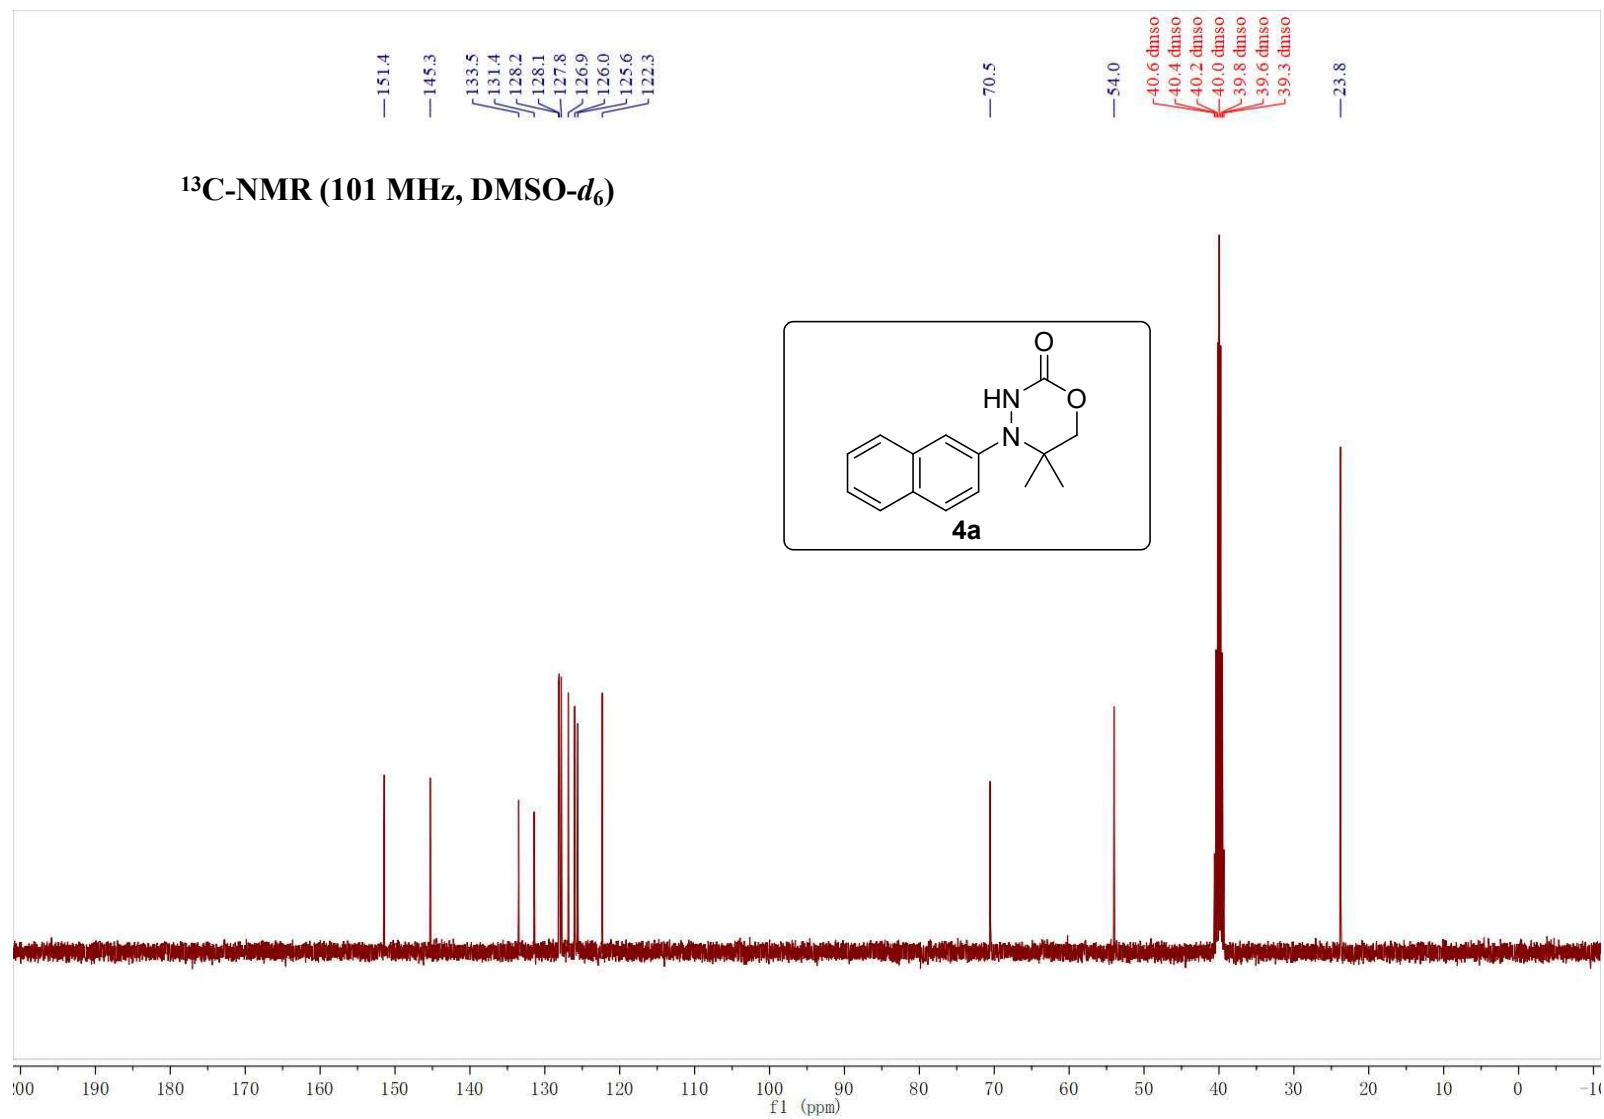



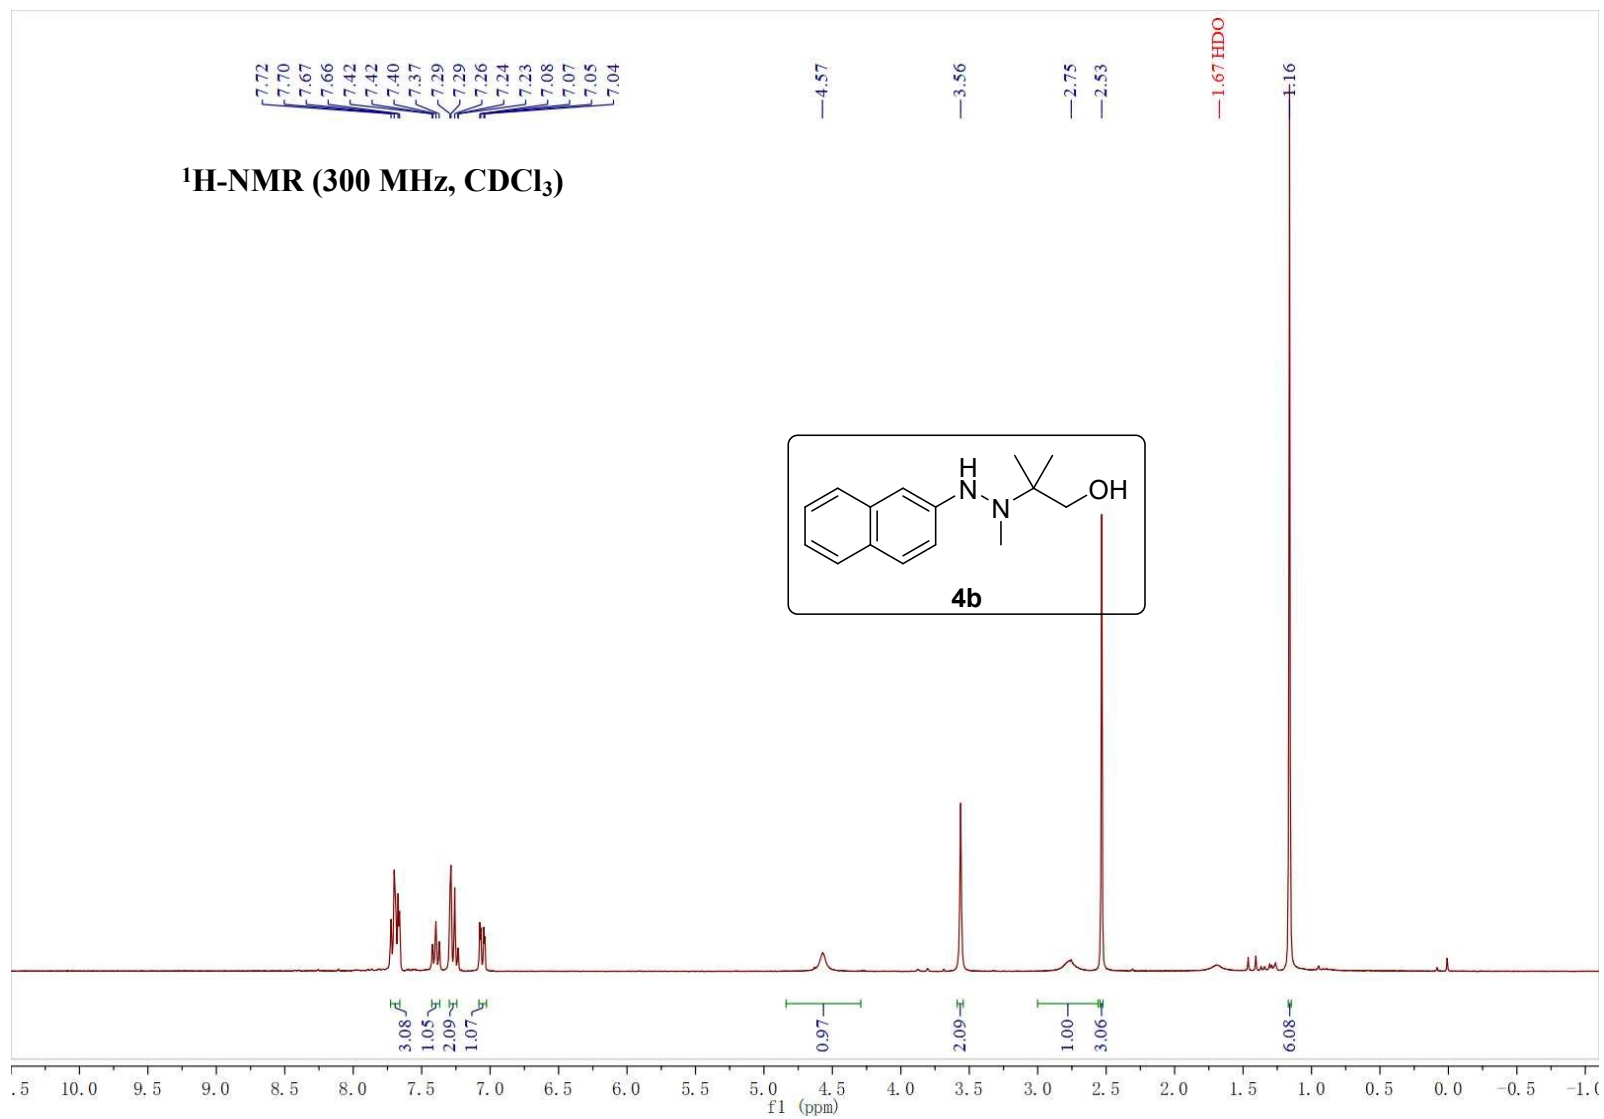

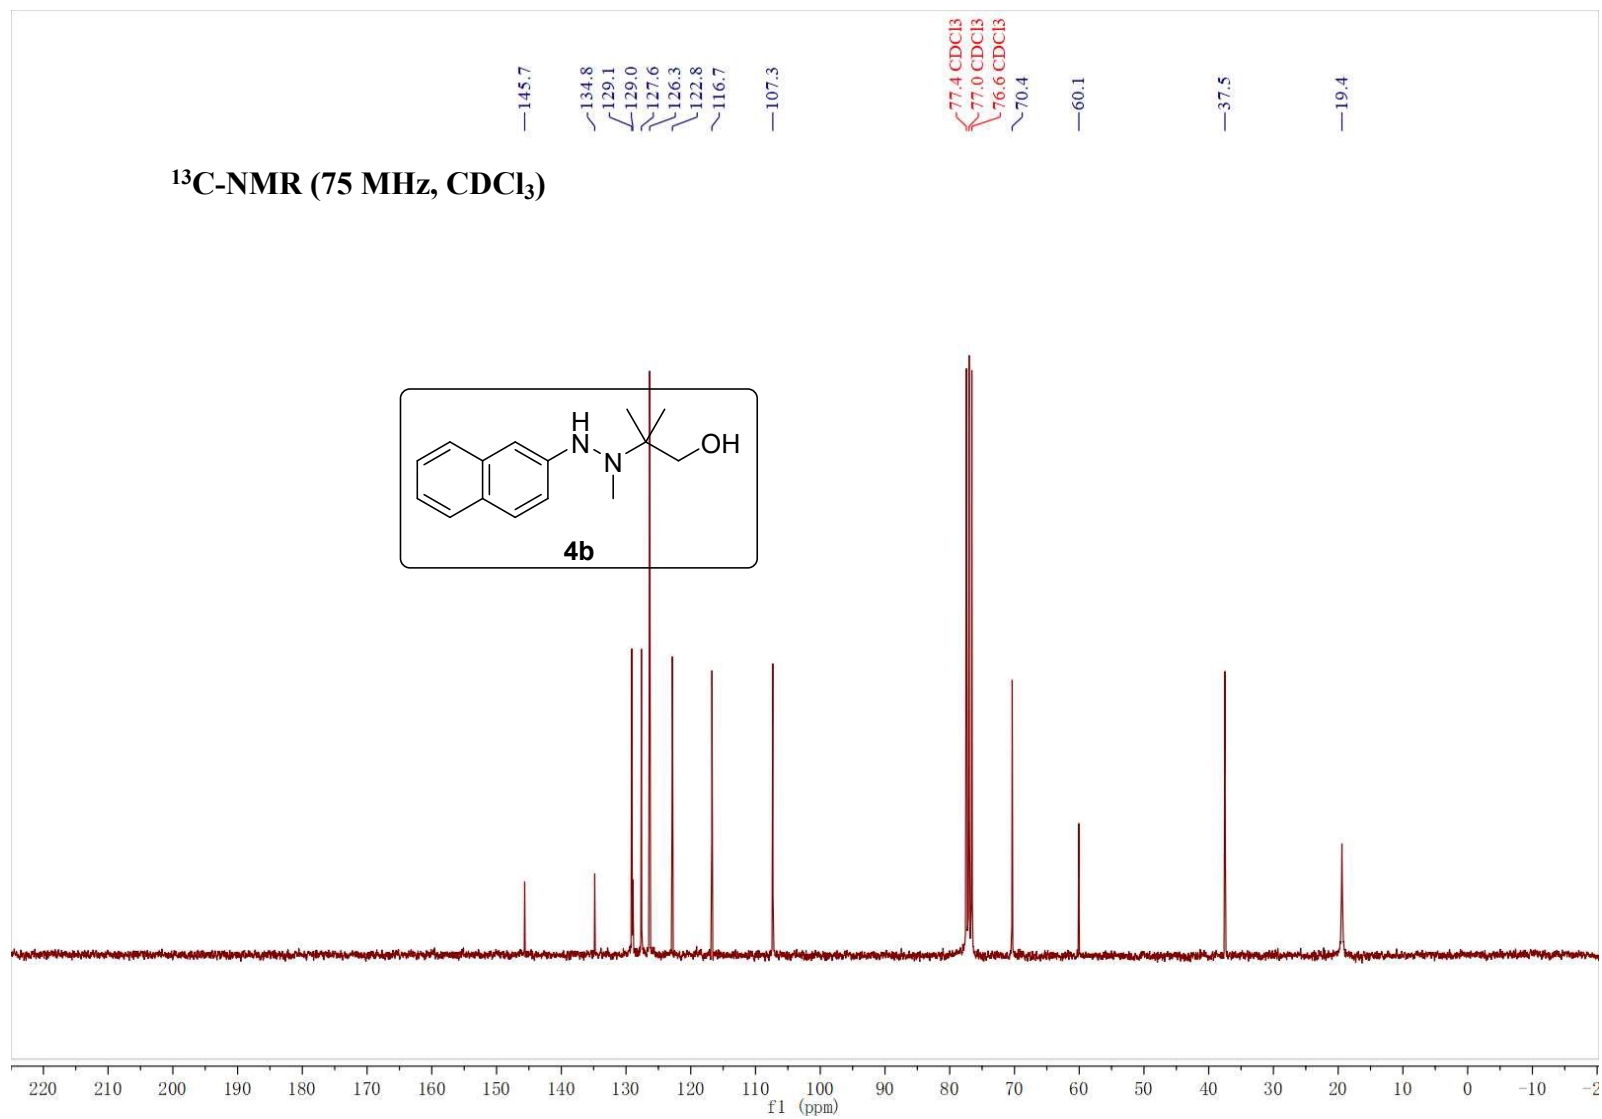

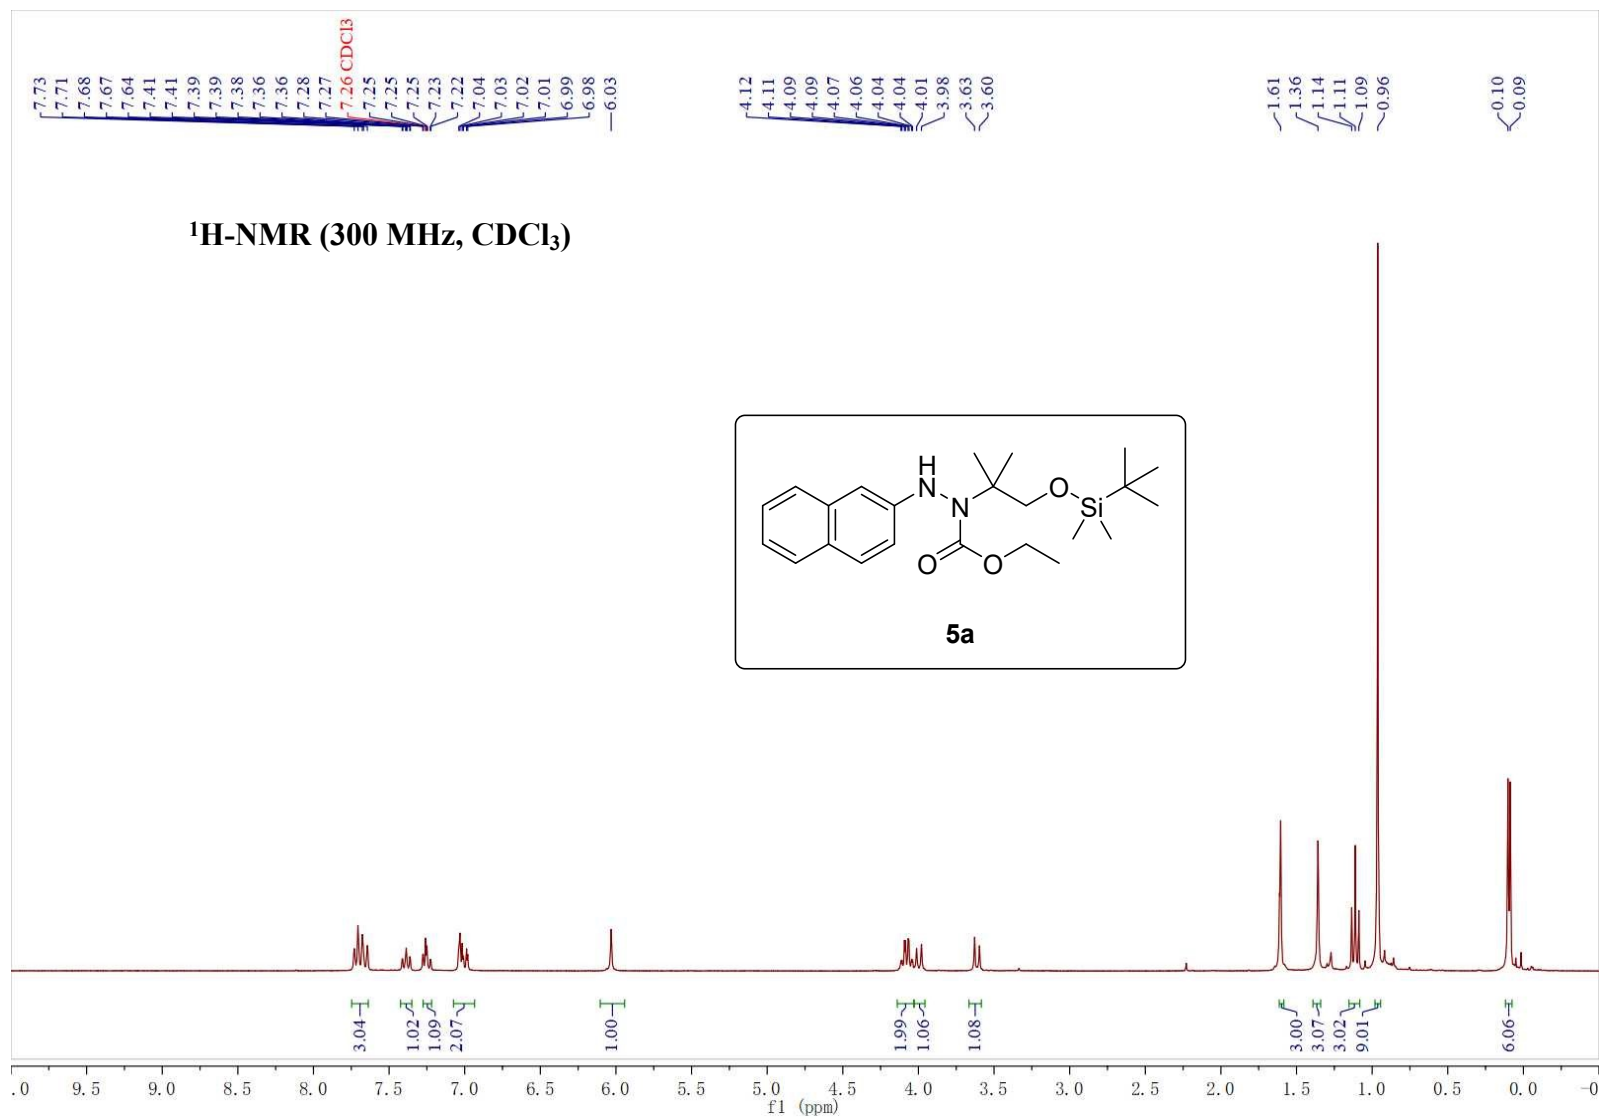

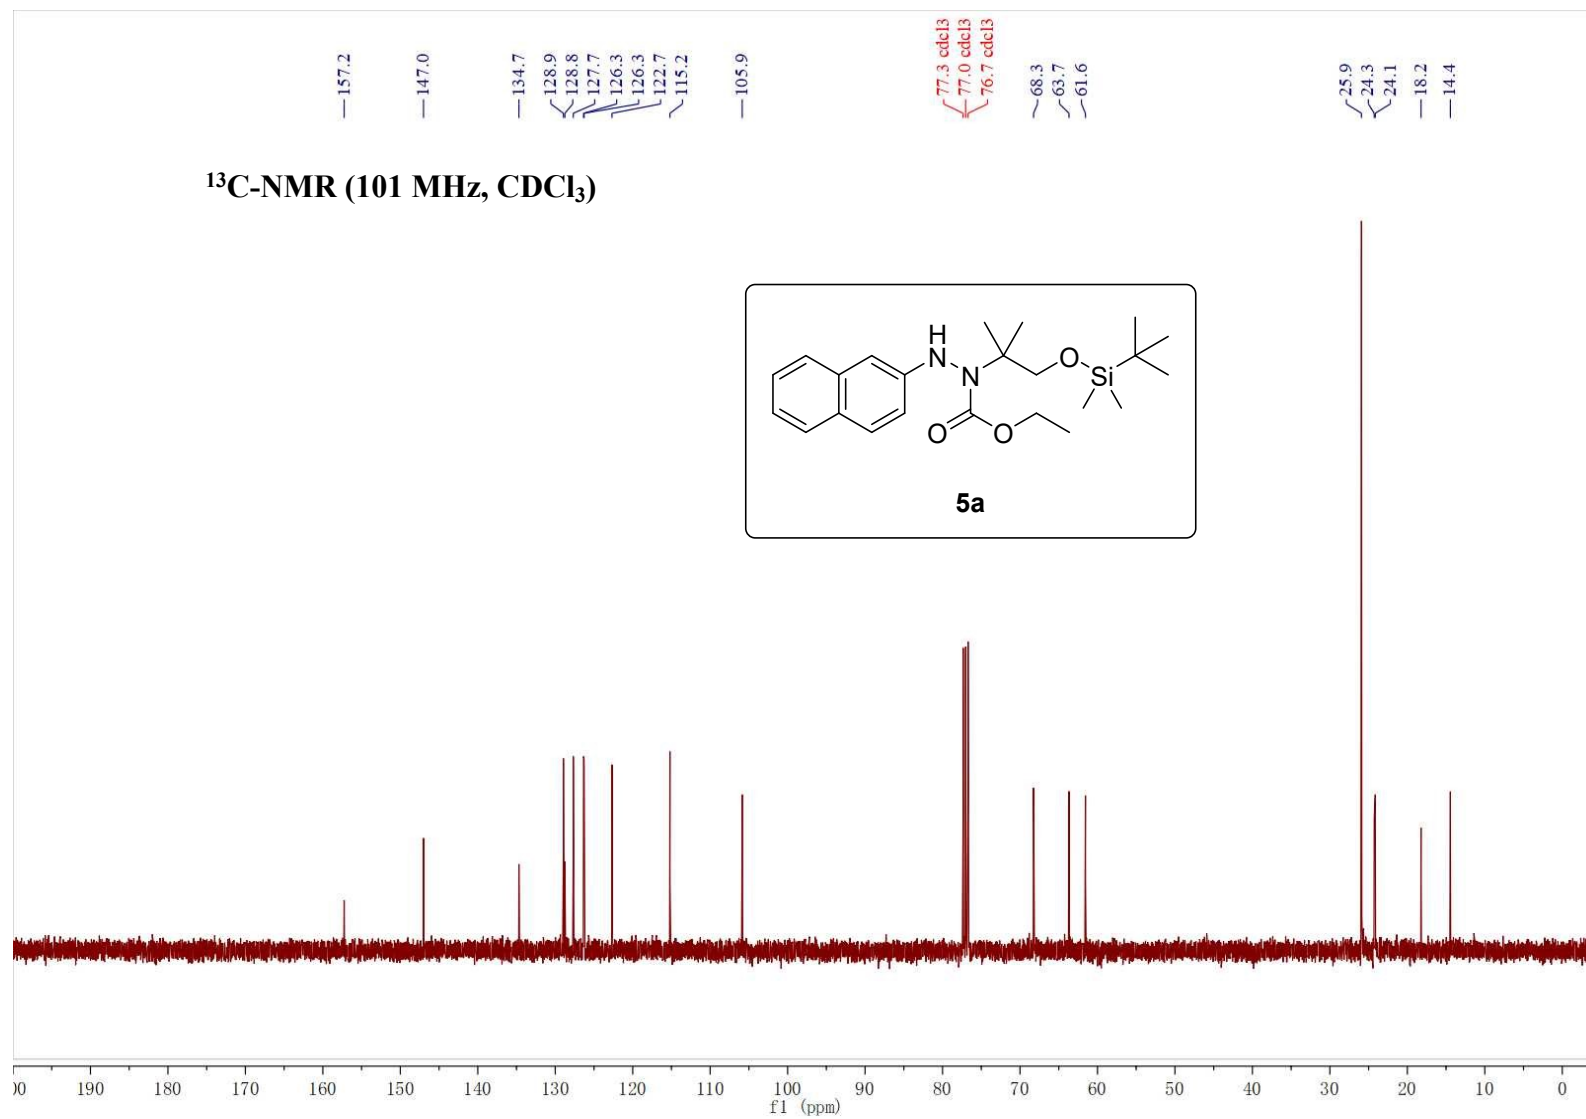

Supplement: d3qo00820g1.pdf [file d3qo00820g1.pdf]
